# Supplementary material for: The C(sp3)–H bond functionalization of thioethers with styrenes with insight into the mechanism
Source: Royal Society of Chemistry journal article supplement (doi:10.1039/d2ob00872f), 2022-01-01
Supplement: d2ob00872f1.pdf [file d2ob00872f1.pdf]

# Supporting Information

## The C(sp<sup>3</sup>)-H Bond Functionalization of Thioethers with Styrenes with Insight into the Mechanism

Zhan Yan,<sup>a,b</sup> Nai-Xing Wang,<sup>\*a</sup> Lei-Yang Zhang,<sup>a</sup> Yue-Hua Wu,<sup>a</sup> Jian-Li Li,<sup>\*b</sup> Meng-Yao She,<sup>b</sup> Xue-Wang Gao,<sup>a</sup> Ke Feng<sup>a</sup> and Yalan Xing<sup>\*c</sup>

<sup>a</sup> Technical Institute of Physics and Chemistry, Chinese Academy of Sciences, Beijing, 100190, China.

<sup>b</sup> College of Chemistry and Materials Science, Northwest University, Xi'an, 710127, China.

<sup>c</sup> Department of Chemistry, William Paterson University of New Jersey, New Jersey, 07470, United States.

### Table of Contents

|                                                                   |     |
|-------------------------------------------------------------------|-----|
| 1. Additional Experiments on Reaction Condition Optimization..... | S1  |
| 2. General Information.....                                       | S1  |
| 3. Experimental Section.....                                      | S1  |
| 4. Mechanism Studies.....                                         | S7  |
| 4.1. Radical Capture Experiments.....                             | S7  |
| 4.2. HMBC Spectrum Evidence for Site Selectivity.....             | S11 |
| 4.3. Relevant Products in Other Research Groups.....              | S13 |
| 4.4. Intermediate Study.....                                      | S17 |
| 4.5. Studies on Reaction Stereo Selectivity.....                  | S17 |
| 5. Characterization Data of All Products.....                     | S20 |
| 6. Copies of NMR Spectra of All Products.....                     | S28 |
| 7. Copies of HRMS Spectra of All Products.....                    | S50 |

## 1. Additional Experiments on Reaction Condition Optimization<sup>a</sup>

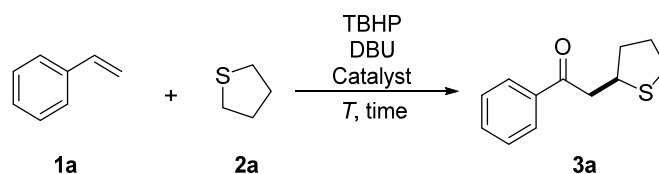

| Entry          | Peroxide (equiv) | Base (equiv) | Catalyst (mol%)                              | Yield (%) <sup>b</sup> |
|----------------|------------------|--------------|----------------------------------------------|------------------------|
| 1              | TBHP (5.0)       | DBU (1.5)    | Cu(OTf) <sub>2</sub> (40)                    | 16                     |
| 2              | TBHP (5.0)       | DBU (1.5)    | Co(OAc) <sub>2</sub> ·4H <sub>2</sub> O (40) | 18                     |
| 3              | TBHP (5.0)       | DBU (1.5)    | MnCl <sub>2</sub> ·4H <sub>2</sub> O (40)    | 21                     |
| 4              | TBHP (5.0)       | DBU (1.5)    | Ni(OAc) <sub>2</sub> ·4H <sub>2</sub> O (40) | 26                     |
| 5              | TBHP (5.0)       | DBU (1.5)    | NiSO <sub>4</sub> ·6H <sub>2</sub> O (40)    | 27                     |
| 6 <sup>c</sup> | TBHP (40)        | DBU (6.0)    | -                                            | 29                     |
| 7 <sup>d</sup> | TBHP (40)        | DBU (6.0)    | -                                            | 36                     |
| 8 <sup>e</sup> | TBHP (40)        | DBU (6.0)    | -                                            | 31                     |

<sup>a</sup> Reaction conditions: Styrene **1a** (21 mg, 0.2 mmol, 1.0 equiv), Tetrahydrothiophene **2a** (3.0 mL), TBHP (70% aqueous solution), in sealed tube at 60 °C for 12 h, unless otherwise noted.

<sup>b</sup> Isolated yields.

<sup>c</sup> Styrene **1a** (31 mg, 0.3 mmol, 1.0 equiv), Tetrahydrothiophene **2a** (6.0 mL), at 80 °C for 24 h.

<sup>d</sup> Styrene **1a** (42 mg, 0.4 mmol, 1.0 equiv), Tetrahydrothiophene **2a** (6.0 mL), at 80 °C for 24 h.

<sup>e</sup> Styrene **1a** (52 mg, 0.5 mmol, 1.0 equiv), Tetrahydrothiophene **2a** (6.0 mL), at 80 °C for 24 h.

## 2. General Information

All of the reagents were purchased from commercial sources without additional purification. The TBHP was 70% aqueous solution. The <sup>1</sup>H NMR and <sup>13</sup>C NMR spectra of the products were measured at the spectrometer of 400 MHz (300 MHz for **3o**) and 100 MHz. And high resolution mass spectroscopy (HRMS) spectra were acquired by EI and ESI.

## 3. Experimental Section

### General Procedure for the C(sp<sup>3</sup>)-H Bond Functionalization of Thioethers with Styrenes

In a 15 mL tube with a stir bar, firstly it was charged with 6 mL thioether, then DBU (182 mg, 1.2 mmol, 6.0 equiv) and TBHP (1032 mg, 8.0 mmol, 40.0 equiv) were added. At last, styrene (0.2 mmol, 1.0 equiv) was added into the reaction system. The tube was sealed with a teflon coated cap and then the reaction mixture was stirred at 80 °C for 24

h. When the reaction got complete, the solvent was evaporated off and the residue was flash chromatographed (petroleum ether/ ethyl acetate 10/1, v/v) to deliver the final pure products.

### Inductive Effect Index Calculation of the C(sp<sup>3</sup>)-H Bond in Thioethers

**Table S1** The Results of Inductive Index Calculation of C(sp<sup>3</sup>)-H Bond in Thioethers

| C(sp <sup>3</sup> )-H                                                               | Inductive Effect Index | Products and Yields                                                                         |
|-------------------------------------------------------------------------------------|------------------------|---------------------------------------------------------------------------------------------|
| 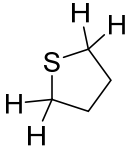   | 0.0110                 | <br>39%   |
|    | 0.00859                | <br>21%   |
|  | 0.00757                | <br>12% |

**Table S2.** Parameters of Bond Length and Atom Electronegativity of Tetrahydrothiophene

| Tetrahydrothiophene |                               |                 |                               |
|---------------------|-------------------------------|-----------------|-------------------------------|
| Bond Length /Å      | C <sub>0</sub> H <sub>0</sub> | SC <sub>0</sub> | C <sub>1</sub> H <sub>1</sub> |
|                     | 1.09232                       | 1.85365         | 1.09447                       |
| Atom                | C                             | H               | S                             |
| Electronegativity   | 2.55                          | 2.20            | 2.58                          |

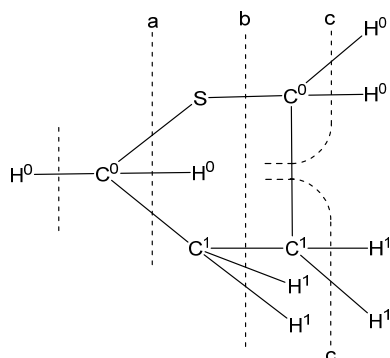

$$I=i_0+i$$

$$=\frac{\delta COH0}{rCOH0}+i$$

$$=\frac{\delta COH0}{rCOH0}+\frac{1}{\alpha}\sum\left(\frac{\delta}{r}\right)a+\frac{1}{\alpha^2}\sum\left(\frac{\delta}{r}\right)b+\frac{1}{\alpha^3}\sum\left(\frac{\delta}{r}\right)c$$

$$=\frac{\delta COH0}{rCOH0}+\frac{1}{\alpha}\left(\frac{\delta SC0}{rSC0}+\frac{\delta H0C0}{rH0C0}+\frac{\delta C1C0}{rC1C0}\right)+\frac{1}{\alpha^2}\left(\frac{\delta COS}{rCOS}+\frac{\delta C1C1}{rC1C1}+2\frac{\delta H1C1}{rH1C1}\right)+\frac{1}{\alpha^3}\left(2\frac{\delta COH0}{rCOH0}+\frac{\delta C1C0}{rC1C0}+2\frac{\delta H1C1}{rH1C1}+\frac{\delta C0C1}{rC0C1}\right)$$

$$=\frac{2.55-2.20}{2.55+2.20}+\frac{1}{1.09232}\times\left(\frac{2.58-2.55}{1.85365}+\frac{2.20-2.55}{1.09232}+0\right)+\frac{1}{2.7^2}\times\left(\frac{2.55-2.58}{1.85365}+0+2\times\frac{2.20-2.55}{1.09447}\right)+\frac{1}{2.7^3}\times\left(2\times\frac{2.20-2.55}{1.09232}+0+2\times\frac{2.20-2.55}{1.09447}+0\right)$$

$$=\frac{2.20-2.55}{1.09447}+0$$

$$=0.0110$$

**Table S3.** Parameters of Bond Length and Atom Electronegativity of Diethyl Sulfide

| Diethyl Sulfide   |                               |                 |                               |
|-------------------|-------------------------------|-----------------|-------------------------------|
| Bond Length /Å    | C <sub>0</sub> H <sub>0</sub> | SC <sub>0</sub> | C <sub>1</sub> H <sub>1</sub> |
|                   | 1.09343                       | 1.83688         | 1.09313                       |
| Atom              | C                             | H               | S                             |
| Electronegativity | 2.55                          | 2.20            | 2.58                          |

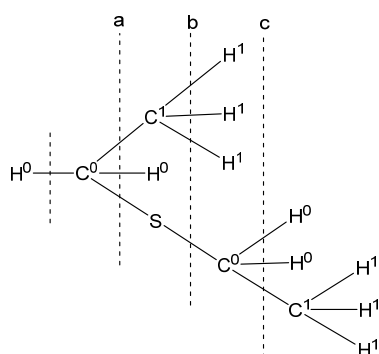

$$I=i_0+i$$

$$=\frac{\delta COH0}{rCOH0}+i$$

$$=\frac{\delta COH0}{rCOH0}+\frac{1}{\alpha}\sum\left(\frac{\delta}{r}\right)a+\frac{1}{\alpha^2}\sum\left(\frac{\delta}{r}\right)b+\frac{1}{\alpha^3}\sum\left(\frac{\delta}{r}\right)c$$

$$=\frac{\delta COH0}{rCOH0}+\frac{1}{\alpha}\left(\frac{\delta C1C0}{rC1C0}+\frac{\delta H0C0}{rH0C0}+\frac{\delta SC0}{rSC0}\right)+\frac{1}{\alpha^2}\left(3\frac{\delta H1C1}{rH1C1}+\frac{\delta COS}{rCOS}\right)+\frac{1}{\alpha^3}\left(2\frac{\delta H0C0}{rH0C0}+\frac{\delta C1C0}{rC1C0}\right)$$

$$=\frac{2.55-2.20}{2.55+2.20}+\frac{1}{1.09343}\times\left(0+\frac{2.20-2.55}{1.09343}+\frac{2.58-2.55}{1.83688}\right)+\frac{1}{2.7^2}\times\left(3\times\frac{2.20-2.55}{1.09313}+\frac{2.55-2.58}{1.83688}\right)+\frac{1}{2.7^3}\times\left(2\times\frac{2.20-2.55}{1.09343}+0\right)$$

$$=0.00859$$

**Table S4.** Parameters of Bond Length and Atom Electronegativity of Dipropyl Sulfide

| Dipropyl Sulfide  |                               |                 |                               |                               |
|-------------------|-------------------------------|-----------------|-------------------------------|-------------------------------|
| Bond Length /Å    | C <sub>0</sub> H <sub>0</sub> | SC <sub>0</sub> | C <sub>1</sub> H <sub>1</sub> | C <sub>2</sub> H <sub>2</sub> |
|                   | 1.09430                       | 1.83665         | 1.09500                       | 1.09401                       |
| Atom              | C                             |                 | H                             |                               |
| Electronegativity | 2.55                          |                 | 2.20                          |                               |

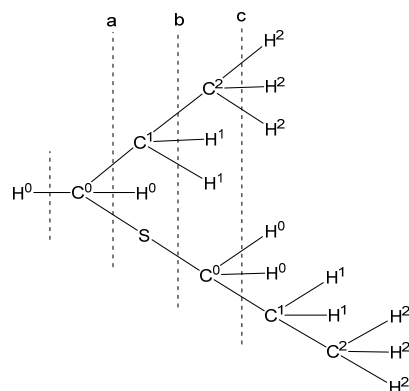

$$I=i_0+i$$

$$=\frac{\delta C_0 H_0}{r_{C_0 H_0}}+i$$

$$=\frac{\delta C_0 H_0}{r_{C_0 H_0}}+\frac{1}{\alpha} \sum\left(\frac{\delta}{r}\right) a+\frac{1}{\alpha^2} \sum\left(\frac{\delta}{r}\right) b+\frac{1}{\alpha^3} \sum\left(\frac{\delta}{r}\right) c$$

$$=\frac{\delta C_0 H_0}{r_{C_0 H_0}}+\frac{1}{\alpha}\left(\frac{\delta C_1 C_0}{r_{C_1 C_0}}+\frac{\delta H_0 C_0}{r_{H_0 C_0}}+\frac{\delta S C_0}{r_{S C_0}}\right)+\frac{1}{\alpha^2}\left(\frac{\delta C_2 C_1}{r_{C_2 C_1}}+2\frac{\delta H_1 C_1}{r_{H_1 C_1}}+\frac{\delta C_0 S}{r_{C_0 S}}\right)+\frac{1}{\alpha^3}\left(3\frac{\delta H_2 C_2}{r_{H_2 C_2}}+2\frac{\delta H_0 C_0}{r_{H_0 C_0}}+\frac{\delta C_1 C_0}{r_{C_1 C_0}}\right)$$

$$=\frac{2.55-2.20}{1.09430}+\frac{1}{2.7} \times\left(0+\frac{2.20-2.55}{1.09430}+\frac{2.58-2.55}{1.83665}\right)+\frac{1}{2.7^2} \times\left(0+2 \times \frac{2.20-2.55}{1.09500}+\frac{2.55-2.58}{1.83665}\right)+\frac{1}{2.7^2} \times\left(3 \times \frac{2.20-2.55}{1.09401}+2 \times \frac{2.20-2.55}{1.09430}+0\right)$$

$$=0.00757$$

### Computational Method

DFT calculations were performed for all the molecular structures at B3LYP/6-311+G\*\* level<sup>S1</sup> using Gaussian 09 program<sup>S2</sup>. All the structures were optimized with no imaginary frequency under the environmental effect provided by CPCM model<sup>S3</sup> with diethyl ether as the solvent.

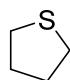

|   |             |             |             |
|---|-------------|-------------|-------------|
| C | 0.04885000  | 1.34800400  | -0.13606800 |
| C | -1.28493200 | 0.71635100  | 0.27273000  |
| C | -1.28493400 | -0.71634800 | -0.27273000 |

|   |             |             |             |
|---|-------------|-------------|-------------|
| C | 0.04884600  | -1.34800500 | 0.13606800  |
| S | 1.31777900  | -0.00000100 | 0.00000000  |
| H | 0.34231300  | 2.17335800  | 0.51218600  |
| H | 0.02335700  | 1.70196100  | -1.16789800 |
| H | -1.36592400 | 0.69603400  | 1.36417600  |
| H | -2.12546000 | 1.30033600  | -0.11278200 |
| H | -2.12546300 | -1.30033100 | 0.11278100  |
| H | -1.36592500 | -0.69603100 | -1.36417600 |
| H | 0.02335400  | -1.70196100 | 1.16789900  |
| H | 0.34230800  | -2.17335900 | -0.51218500 |

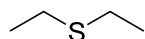

|   |             |             |             |
|---|-------------|-------------|-------------|
| C | 0.00000000  | 2.73880700  | 0.13274800  |
| C | 0.00000000  | 1.41108400  | -0.62015400 |
| S | 0.00000000  | 0.00000000  | 0.56005400  |
| C | 0.00000000  | -1.41108400 | -0.62015400 |
| C | 0.00000000  | -2.73880700 | 0.13274800  |
| H | 0.00000000  | 3.56922300  | -0.57854500 |
| H | 0.88535500  | 2.83827500  | 0.76580200  |
| H | -0.88535500 | 2.83827500  | 0.76580200  |
| H | 0.88569000  | 1.32809800  | -1.25452800 |
| H | -0.88569000 | 1.32809800  | -1.25452800 |
| H | 0.88569000  | -1.32809800 | -1.25452800 |
| H | -0.88569000 | -1.32809800 | -1.25452800 |
| H | 0.00000000  | -3.56922300 | -0.57854500 |
| H | 0.88535500  | -2.83827500 | 0.76580200  |
| H | -0.88535500 | -2.83827500 | 0.76580200  |

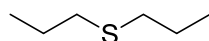

|   |             |             |             |
|---|-------------|-------------|-------------|
| C | 0.00000000  | 2.74487000  | 0.35835200  |
| C | 0.00000000  | 1.41019500  | -0.38810000 |
| S | 0.00000000  | 0.00000000  | 0.79280400  |
| C | 0.00000000  | -1.41019500 | -0.38810000 |
| C | 0.00000000  | -2.74487000 | 0.35835200  |
| C | 0.00000000  | 3.94071000  | -0.60028400 |
| C | 0.00000000  | -3.94071000 | -0.60028400 |
| H | 0.87821700  | 2.79645000  | 1.01043300  |
| H | -0.87821700 | 2.79645000  | 1.01043300  |
| H | 0.88634900  | 1.32836700  | -1.02325500 |
| H | -0.88634900 | 1.32836700  | -1.02325500 |
| H | 0.88634900  | -1.32836700 | -1.02325500 |
| H | -0.88634900 | -1.32836700 | -1.02325500 |
| H | 0.87821700  | -2.79645000 | 1.01043300  |
| H | -0.87821700 | -2.79645000 | 1.01043300  |
| H | -0.88416600 | 3.93209200  | -1.24487600 |
| H | 0.88416600  | 3.93209200  | -1.24487600 |

|   |             |             |             |
|---|-------------|-------------|-------------|
| H | 0.00000000  | 4.88344700  | -0.04684100 |
| H | 0.88416600  | -3.93209200 | -1.24487600 |
| H | 0.00000000  | -4.88344700 | -0.04684100 |
| H | -0.88416600 | -3.93209200 | -1.24487600 |

## References

- S1. A. D. Becke, A new mixing of Hartree–Fock and local density-functional theories, *J. Chem. Phys.* 1993, **98**, 1372-1377.
- S2. M. J. Frisch, G. W. Trucks, H. B. Schlegel, G. E. Scuseria, M. A. Robb, J. R. Cheeseman, G. Scalmani, V. Barone, B. Mennucci, G. A. Petersson, H. Nakatsuji, M. Caricato, X. Li, H. P. Hratchian, A. F. Izmaylov, J. Bloino, G. Zheng, J. L. Sonnenberg, M. Hada, M.; Toyota, K.; Fukuda, R.; Hasegawa, J.; Ishida, M.; Nakajima, T.; Honda, Y.; Kitao, O. Ehara, H. Nakai, T. Vreven, J. A. Montgomery, J. E. Peralta, F. Ogliaro, M. Bearpark, J. J. Heyd, E. Brothers, K. N. Kudin, V.N. Staroverov, T. Keith, R. Kobayashi, J. Normand, K. Raghavachari, A. Rendell, J. C. Burant, S. S. Iyengar, J. Tomasi, M. Cossi, N. Rega, J. M. Millam, M. Klene, J. E. Knox, J. B. Cross, V. Bakken, C. Adamo, J. Jaramillo, R. Gomperts, R. E. Stratmann, O. Yazyev, A. J. Austin, R. Cammi, C. Pomelli, J.W. Ochterski, R. L. Martin, K. Morokuma, V. G. Zakrzewski, G. A. Voth, P. Salvador, J. J. Dannenberg, S. Dapprich, A. D. Daniels, O. Farkas, J. B. Foresman, J. V. Ortiz, J. Cioslowski, D. J. Fox, *Gaussian 09*, Gaussian: Wallingford, CT, USA, Revision D.01, 2013.
- S3. V. Barone, M. Cossi, Quantum Calculation of Molecular Energies and Energy Gradients in Solution by a Conductor Solvent Model, *J. Phys. Chem. A* 1998, **102**, 1995-2001.

## 4. Mechanism Studies

### 4.1. Radical Capture Experiments

#### Reaction Procedure at the Beginning

In a 10 mL tube with a stir bar, firstly it was charged with 3.0 mL tetrahydrothiophene, then TEMPO (312 mg, 2.0 mmol, 2.0 equiv), DBU (152 mg, 1.0 mmol, 1.0 equiv) and TBHP (643 mg, 5.0 mmol, 5.0 equiv) were added. At last, styrene (104 mg, 1.0 mmol, 1.0 equiv) was added into the reaction system. The tube was sealed with a teflon coated cap and then the reaction mixture was stirred at 60 °C for 24 h. When the reaction got complete, get the reaction mixture sample and measure HRMS.

#### Copy of the HRMS spectrum

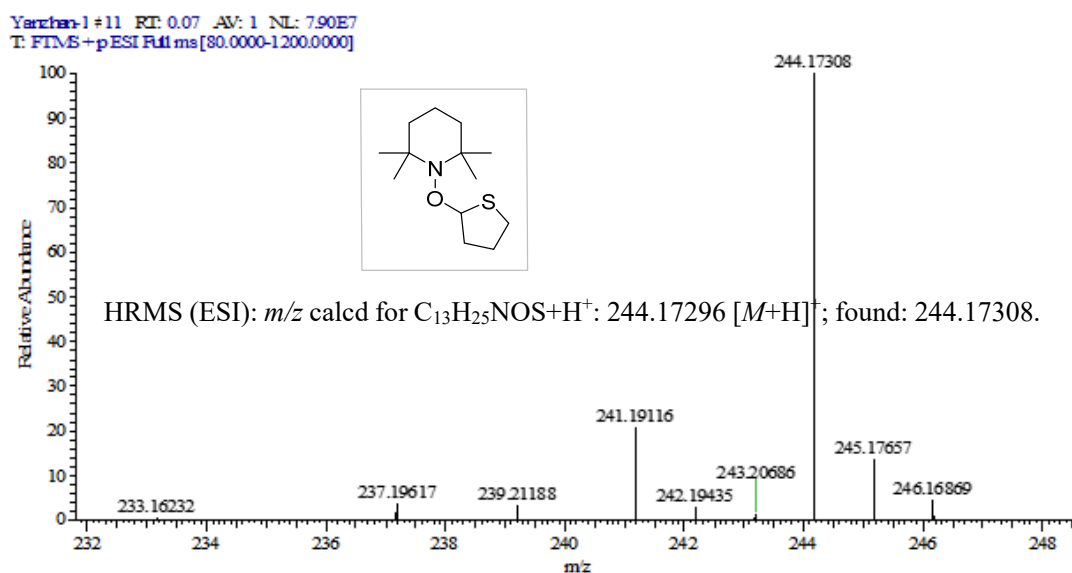

HRMS spectrum of Adduct **D**

#### Reaction Procedure Modified

In a 15 mL tube with a stir bar, firstly it was charged with 6.0 mL tetrahydrothiophene, then TEMPO (78 mg, 0.5 mmol, 0.5 equiv), DBU (152 mg, 1.0 mmol, 1.0 equiv) and TBHP (1287 mg, 10.0 mmol, 10.0 equiv) were added. At last, styrene (104 mg, 1.0 mmol, 1.0 equiv) was added into the reaction system. The tube was sealed with a teflon coated cap and then the reaction mixture was stirred at 60 °C for 0.5 h, 1.0 h, 3.0 h and 6.0 h, respectively. When the reaction got complete, get the reaction mixture sample and measure HRMS.



## Copies of the HRMS spectra

Yanzhan-1 #9 RT: 0.06 AV: 1 NL: 4.30E6  
T: FTMS + p ESI Full lock ms [80.0000-1200.0000]

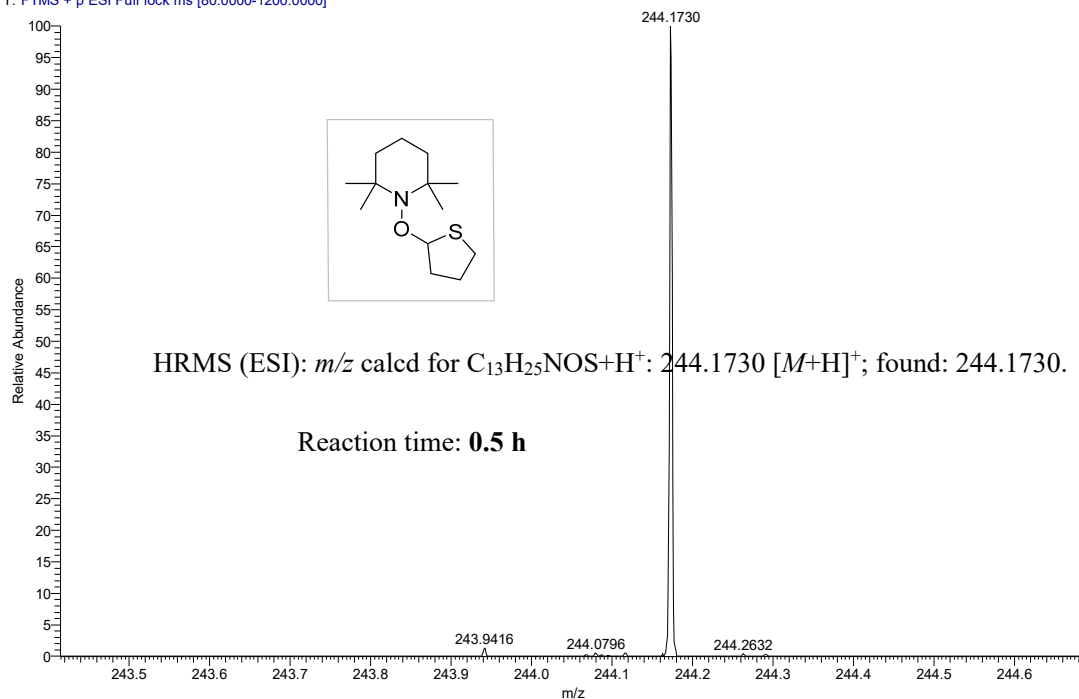

HRMS spectrum of Adduct **D** (after **0.5 h** reaction)

Yanzhan-4 #10 RT: 0.06 AV: 1 NL: 1.35E7  
T: FTMS + p ESI Full lock ms [80.0000-1200.0000]

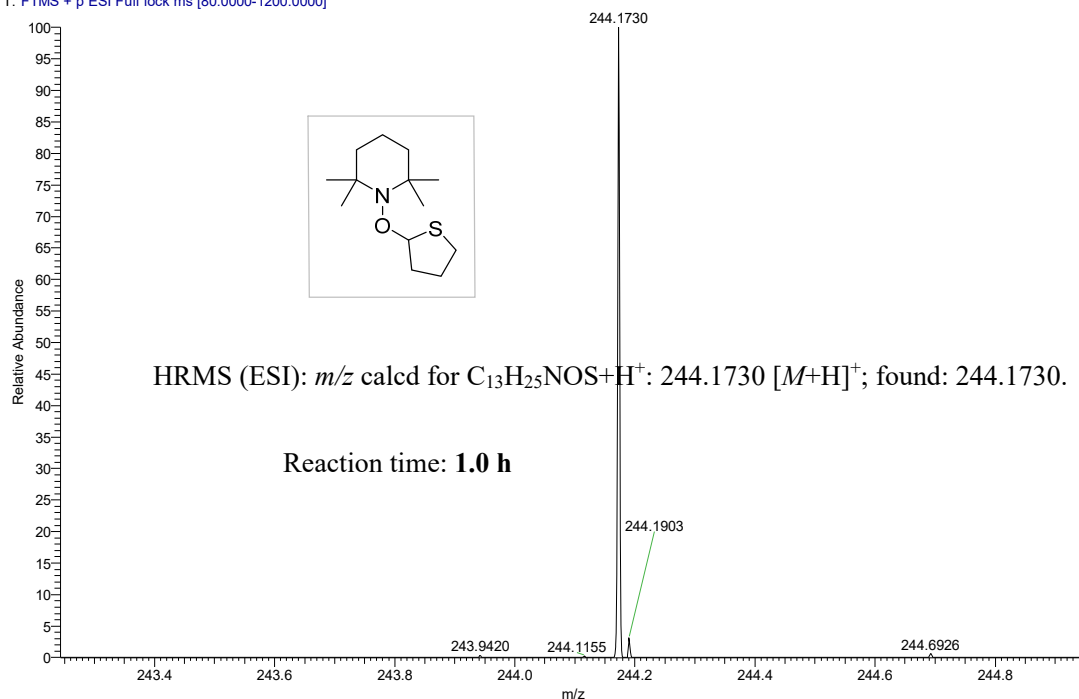

HRMS spectrum of Adduct **D** (after **1.0 h** reaction)

Yanzhan-4 #10 RT: 0.06 AV: 1 NL: 5.31E4  
T: FTMS + p ESI Full lock ms [80.0000-1200.0000]

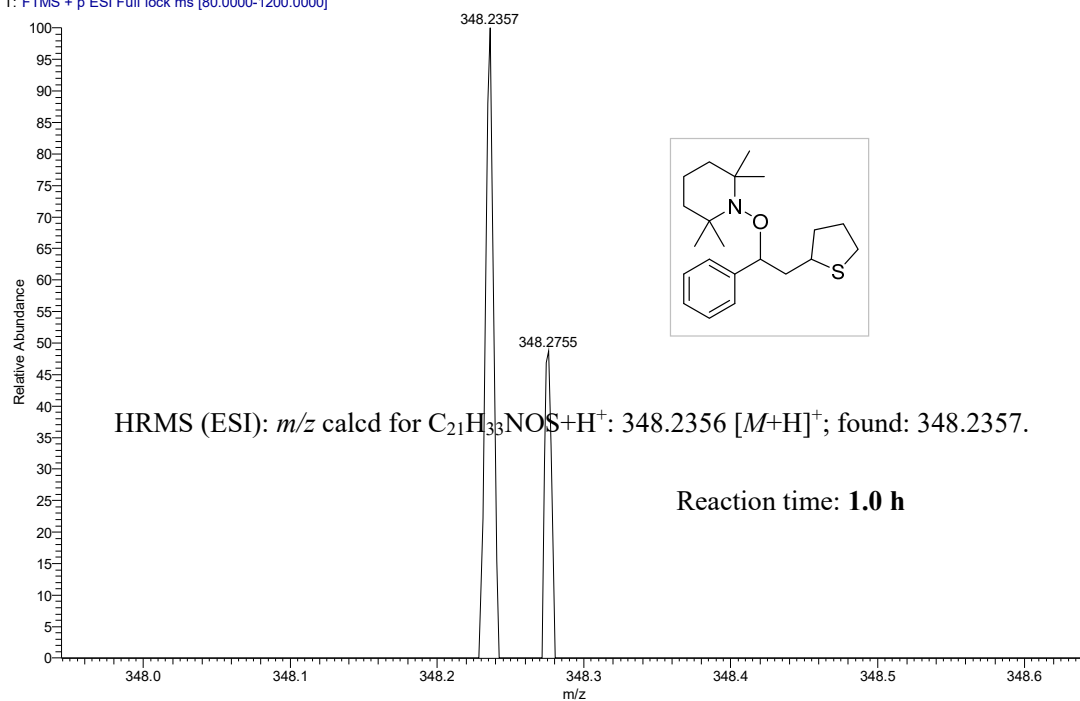

HRMS spectrum of Adduct **E** (after **1.0 h** reaction)

Yanzhan-4 #11 RT: 0.07 AV: 1 NL: 1.36E6  
T: FTMS + p ESI Full lock ms [80.0000-1200.0000]

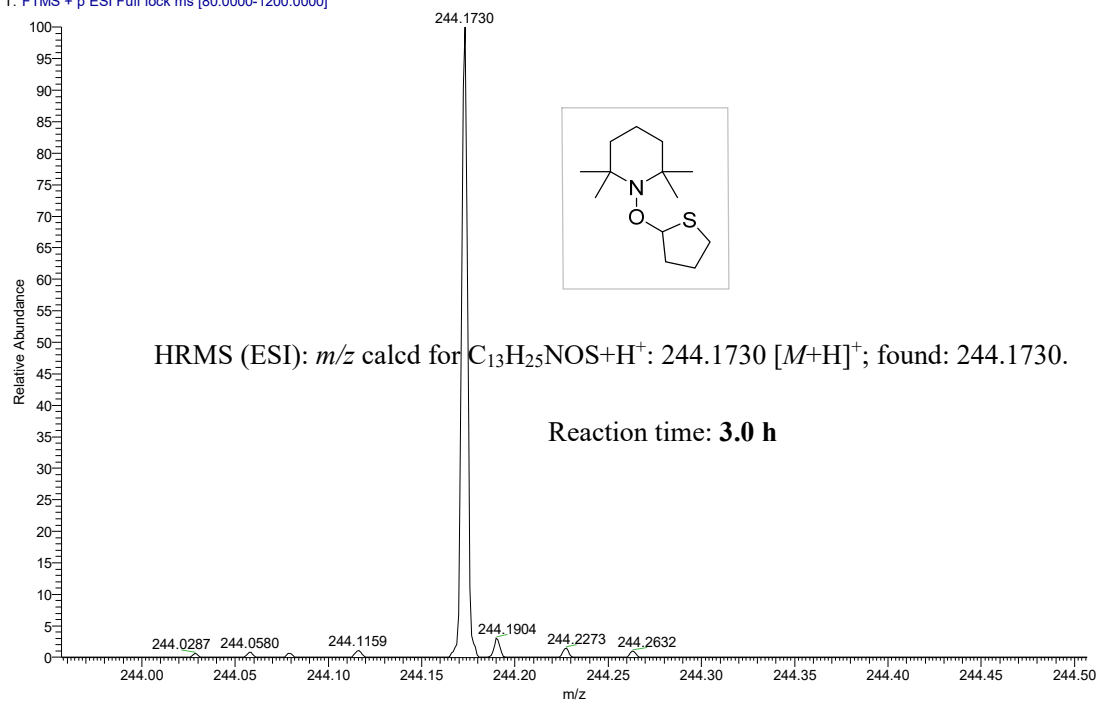

HRMS spectrum of Adduct **D** (after **3.0 h** reaction)

Yanzhan-4 #12 RT: 0.08 AV: 1 NL: 1.38E5  
T: FTMS + p ESI Full lock ms [80.0000-1200.0000]

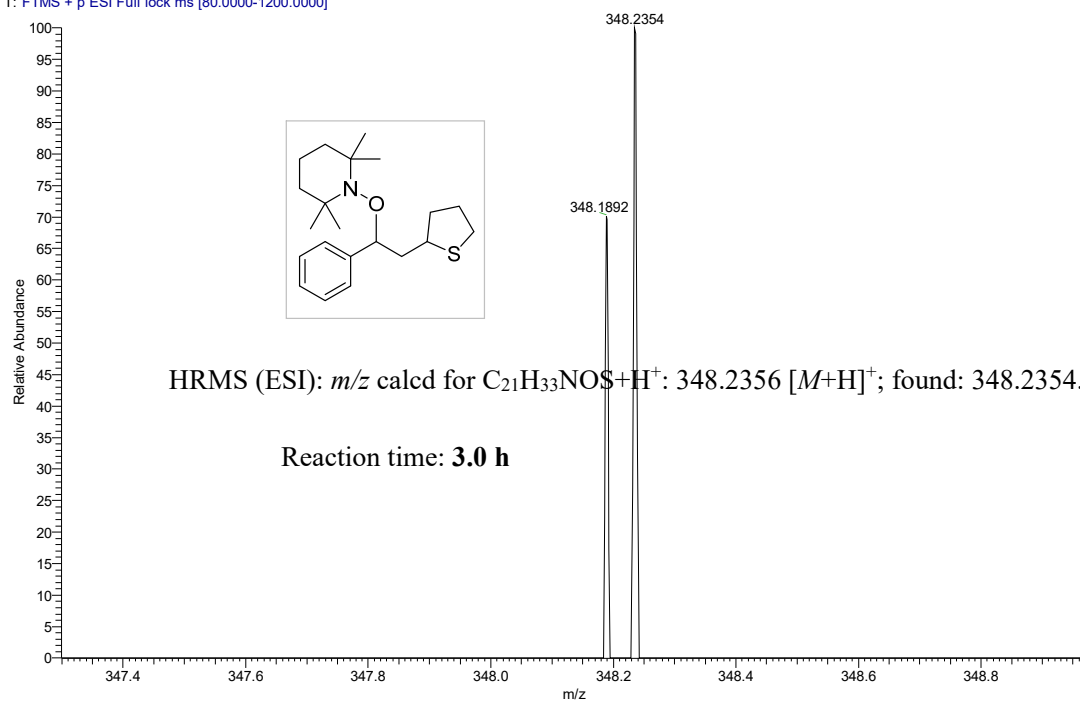

HRMS spectrum of Adduct **E** (after **3.0 h** reaction)

Yanzhan-4 #11 RT: 0.07 AV: 1 NL: 8.54E6  
T: FTMS + p ESI Full lock ms [80.0000-1200.0000]

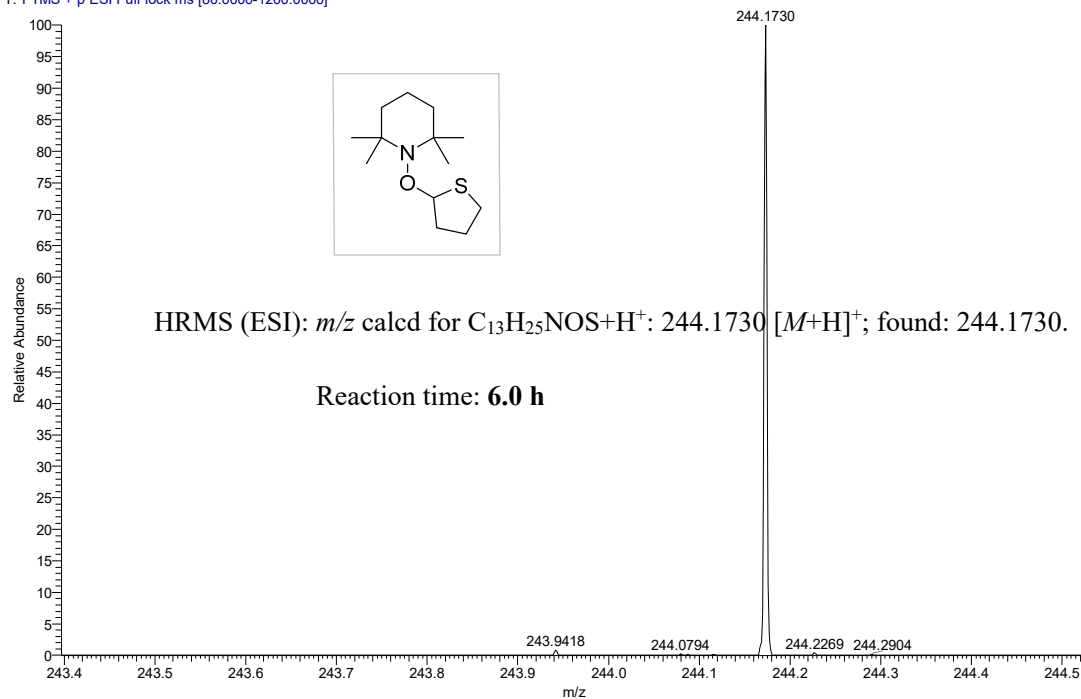

HRMS spectrum of Adduct **D** (after **6.0 h** reaction)

Yanzhan-4 #11 RT: 0.07 AV: 1 NL: 2.01E5  
T: FTMS + p ESI Full lock ms [80.0000-1200.0000]

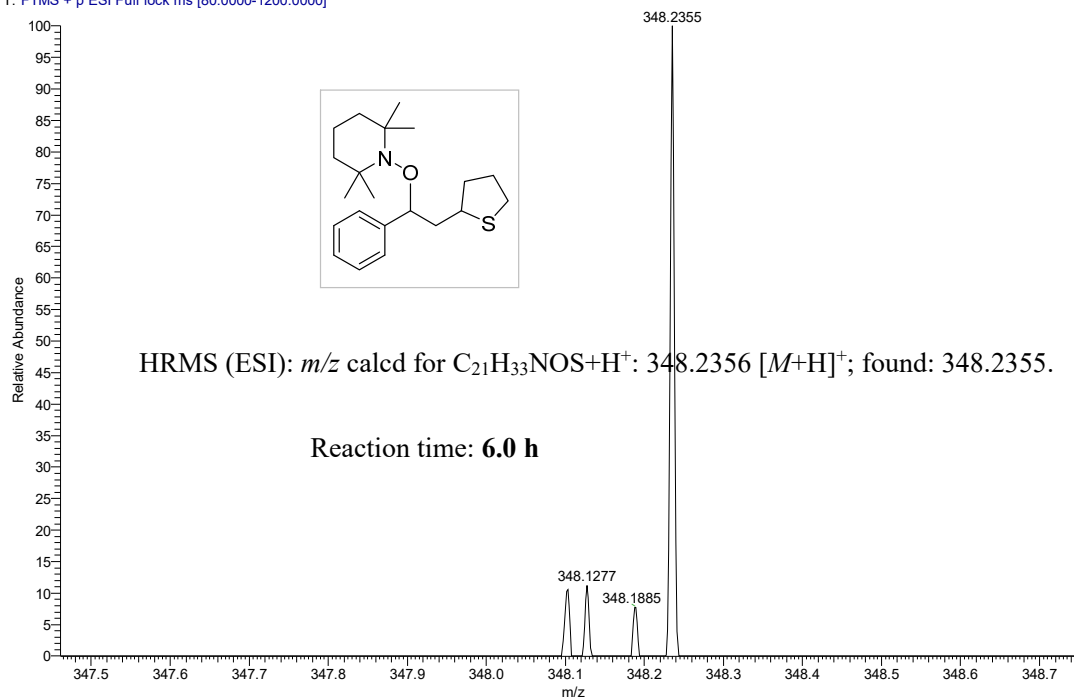

HRMS spectrum of Adduct **E** (after **6.0 h** reaction)

## 4.2.HMBC Spectrum Evidence for Site Selectivity

### Synthetic procedure

A mixture of  $Cu(OAc)_2 \cdot H_2O$  (20 mg, 0.1 mmol, 10 mol%), TBHP (320 mg, 2.5 mmol, 2.5 equiv, 70% aqueous solution), DBU (200 mg, 1.3 mmol, 1.3 equiv) and indene (116 mg, 1.0 mmol, 1.0 equiv) were added in sequence to an oven-dried 15 mL sealed tube with a stir bar filled with 5 mL diethyl ether. The tube was sealed with a teflon coated cap and then the reaction mixture was stirred at 60 °C for 24 h. When the reaction got completed, evaporated the reaction solution to get the reaction residue. Made column separation using elute (petroleum ether/ethyl acetate = 20/1, v/v) and silicon gel (200-300 mesh), collected the desired component and evaporated to get the final product.

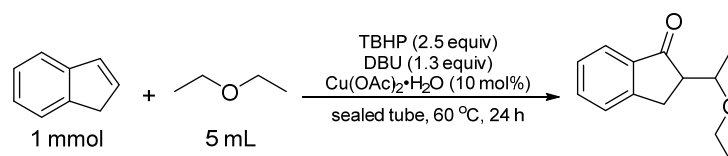

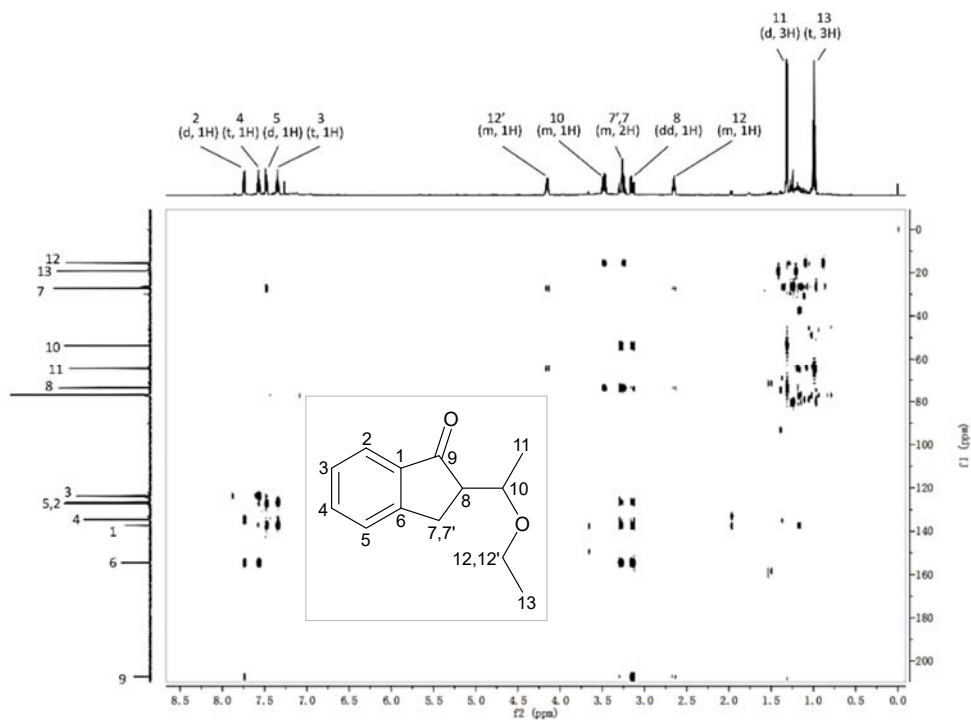

**Figure S1** HMBC Spectrum of Compound **F**

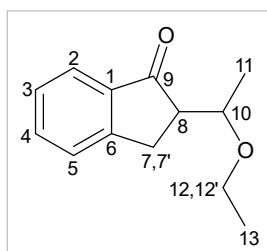

**Table S5** Heteronuclear Correlation of Compound **F**

| C<br>H | C1   | C2     | C3           | C4           | C5      | C6     | C7           | C8           | C9    | C10          | C11          | C12     | C13     |       |
|--------|------|--------|--------------|--------------|---------|--------|--------------|--------------|-------|--------------|--------------|---------|---------|-------|
| H2     | 7.75 | 137.22 | 126.59       | 123.69       | 134.56  | 127.08 | 154.58       | 27.25        | 73.75 | 207.23       | 53.77        | 64.65   | 15.38   | 19.18 |
| H3     | 7.35 | β      | Bonding<br>α | Bonding<br>α | β       | β      |              |              |       | β            |              |         |         |       |
| H4     | 7.57 |        | α            | Bonding<br>α |         | β      |              |              |       |              |              |         |         |       |
| H5     | 7.49 | β      | β            |              | Bonding |        | β            |              |       |              |              |         |         |       |
| H7     | 3.24 | β      |              |              |         | α      | Bonding<br>α | α            |       | β            |              |         |         |       |
| H7'    | 3.26 | β      |              |              |         | α      | Bonding<br>α | α            |       | β            |              |         |         |       |
| H8     | 3.15 | β      |              |              |         | β      |              | Bonding<br>α | α     | α            |              |         |         |       |
| H10    | 3.48 |        |              |              |         |        |              | α            |       | Bonding<br>α |              | β       |         |       |
| H11    | 1.32 |        |              |              |         |        |              | β            |       |              | Bonding<br>α |         |         |       |
| H12    | 2.65 |        |              |              |         |        |              |              |       |              |              | Bonding |         |       |
| H12'   | 4.16 |        |              |              |         |        |              |              |       |              |              | Bonding |         |       |
| H13    | 0.99 |        |              |              |         |        |              |              |       |              |              |         | Bonding |       |

### 4.3.Relevant Products in Other Research Groups

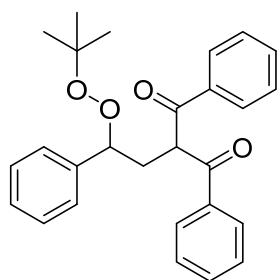

2-(2-(*tert*-butylperoxy)-2-phenylethyl)-1,3-diphenylpropane-1,3-dione:  $^1\text{H}$  NMR (400 MHz,  $\text{CDCl}_3$ )  $\delta$  8.02 (d,  $J = 8.0$  Hz, 2H), 7.89 (d,  $J = 8.0$  Hz, 2H), 7.58 – 7.54 (m, 1H), 7.52 – 7.30 (m, 10H), 5.64 (t,  $J = 8.0$  Hz, 1H), 5.03 (t,  $J = 7.6$  Hz, 1H), 2.62 – 2.58 (m, 2H), 1.17 (s, 9H).  $^{13}\text{C}$  NMR (100 MHz,  $\text{CDCl}_3$ )  $\delta$  196.02, 195.74, 140.82, 136.56, 136.01, 133.63, 133.45, 129.03, 128.95, 128.92, 128.67, 128.47, 128.09, 127.09, 83.88, 80.54, 53.65, 34.93, 26.65. HRMS (ESI):  $m/z$  calcd for  $\text{C}_{27}\text{H}_{28}\text{O}_4 + \text{Na}^+$ : 439.1880  $[\text{M} + \text{Na}]^+$ ; found: 439.1878.

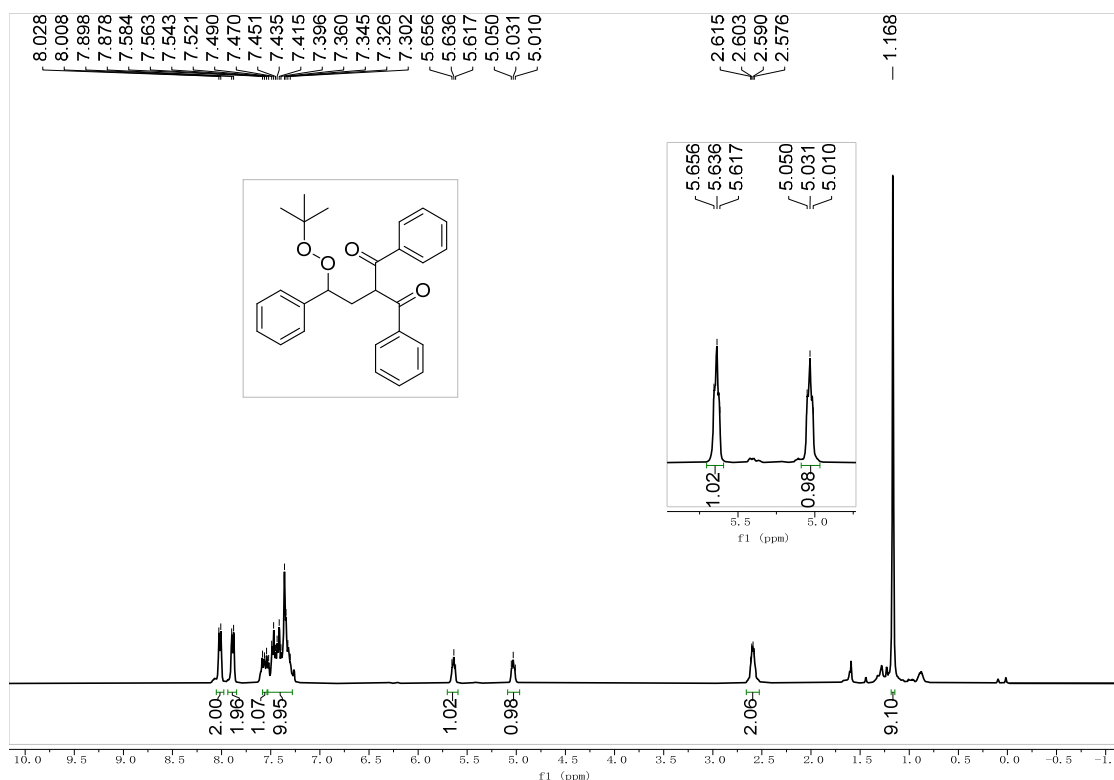

$^1\text{H}$  NMR of  $\alpha$ -*tert*-butylperoxyl functionalized product

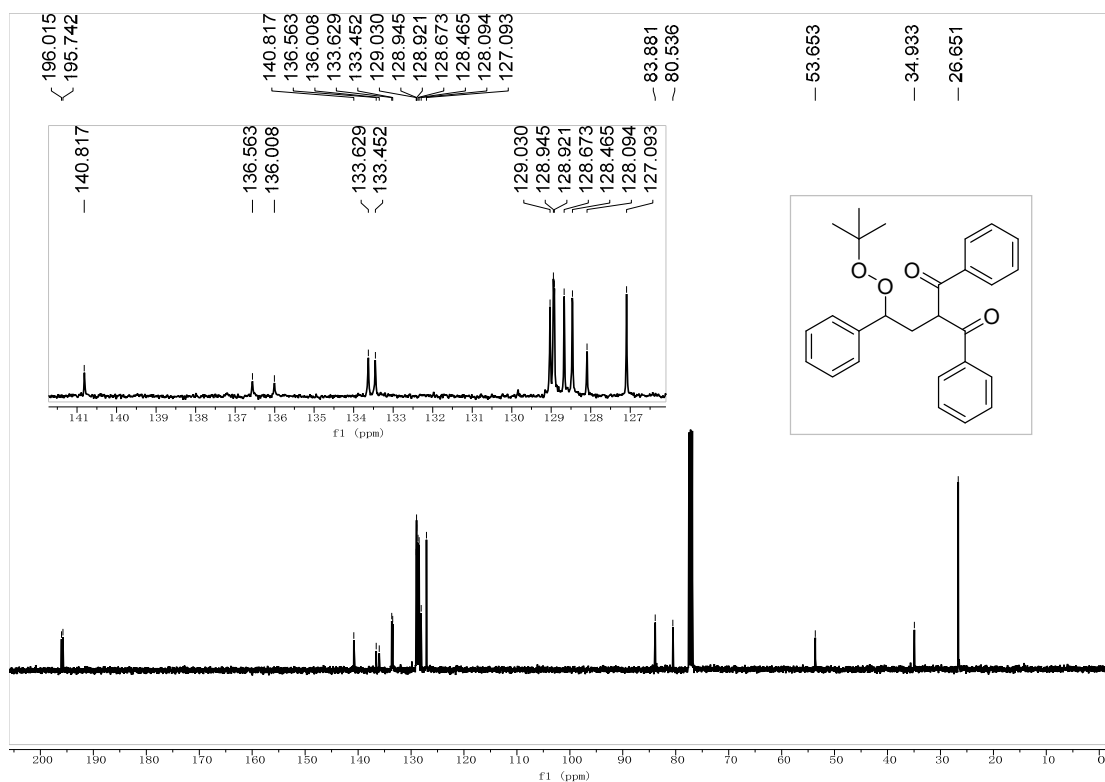

$^{13}\text{C}$  NMR of  $\alpha$ -tert-butylperoxyl functionalized product

Yanzhan-4 #17 RT: 0.10 AV: 1 NL: 1.05E8  
T: FTMS+p ESI Full ms [80.0000-1200.0000]

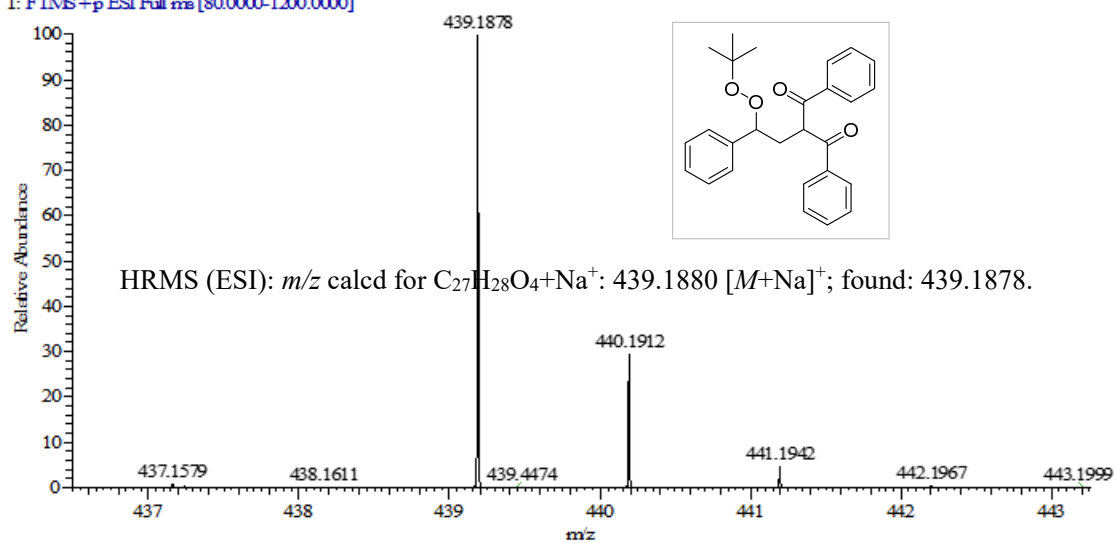

HRMS of  $\alpha$ -tert-butylperoxyl functionalized product

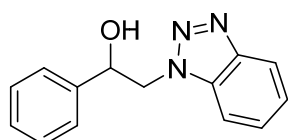

2-(1*H*-benzo[*d*][1,2,3]triazol-1-yl)-1-phenylethan-1-ol: <sup>1</sup>H NMR (400 MHz, CDCl<sub>3</sub>) δ 7.86 (d, *J* = 8.0 Hz, 1H), 7.51 – 7.29 (m, 8H), 5.37 (d, *J* = 8.4 Hz, 1H), 4.84 – 4.70 (m, 2H), 3.64 (s, 1H). <sup>13</sup>C NMR (100 MHz, CDCl<sub>3</sub>) δ 145.73, 140.68, 134.01, 128.98, 128.63, 127.56, 126.10, 124.13, 119.82, 110.10, 73.59, 55.73. HRMS (ESI): *m/z* calcd for C<sub>14</sub>H<sub>13</sub>N<sub>3</sub>O+H<sup>+</sup>: 240.1131 [*M*+H]<sup>+</sup>; found: 240.1133.

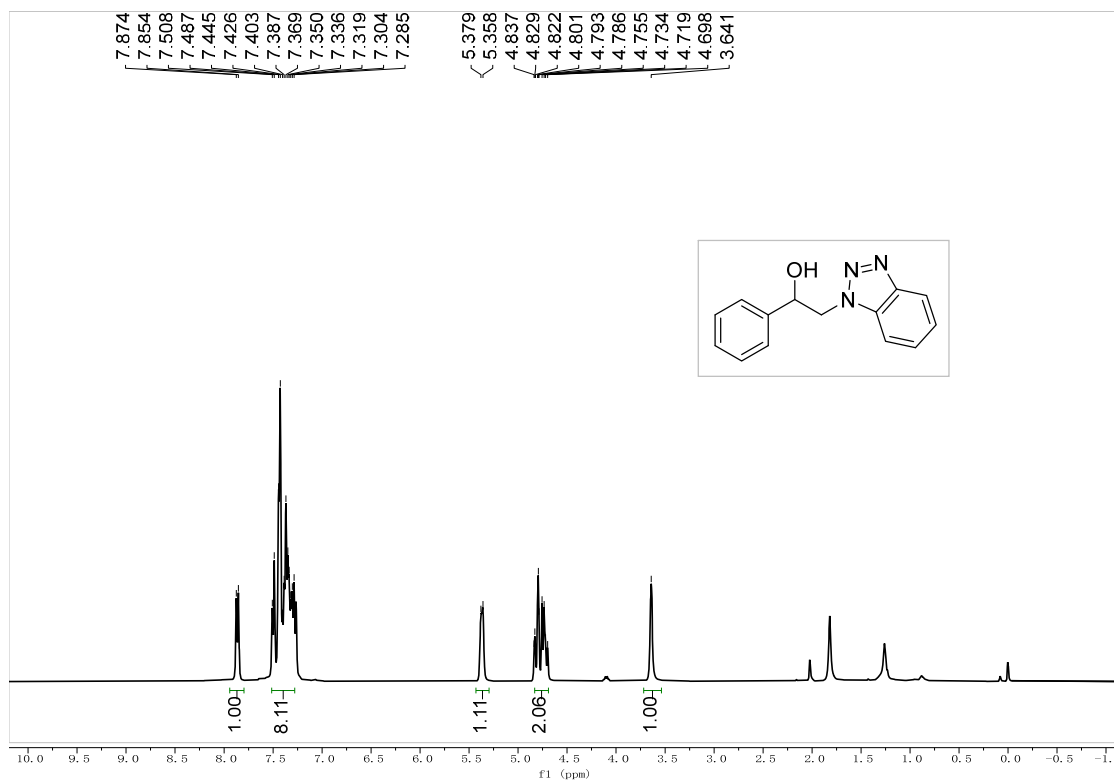

<sup>1</sup>H NMR of α-hydroxyl functionalized product



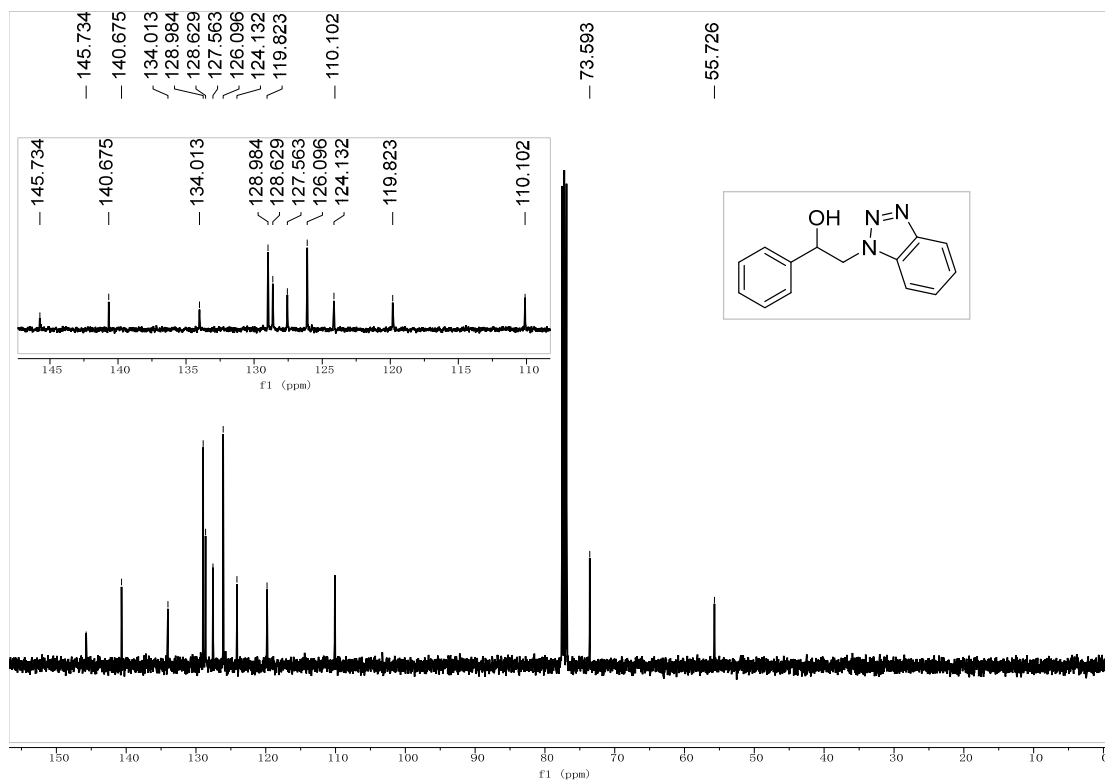

$^{13}\text{C}$  NMR of  $\alpha$ -hydroxyl functionalized product

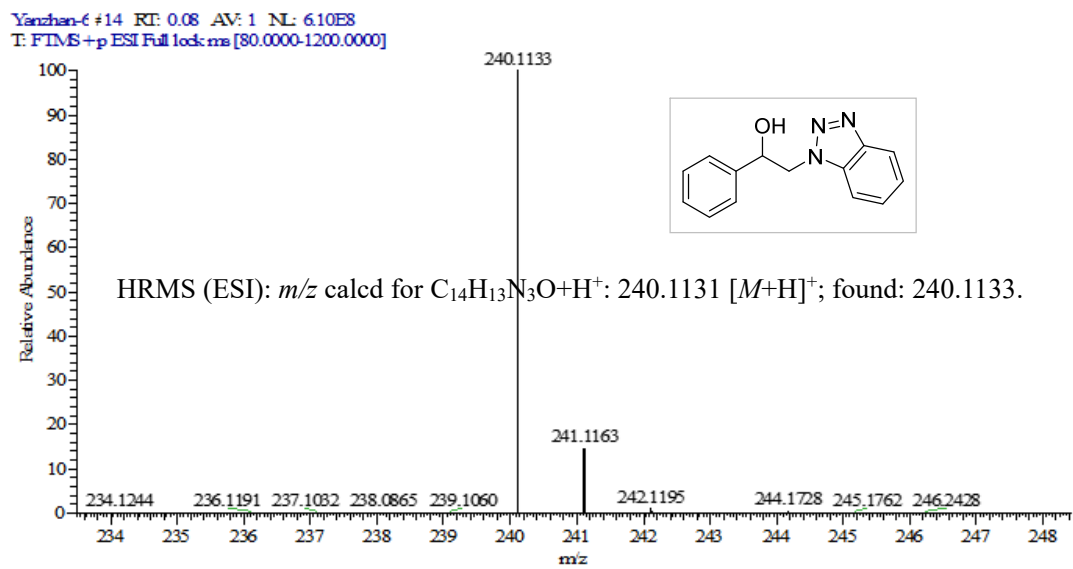

HRMS of  $\alpha$ -hydroxyl functionalized product

#### 4.4. Intermediate Study

Yanzhan-7 #20 RT: 0.11 AV: 1 NL: 1.97E6  
T: FTMS + pESI Full ms [80.0000-1200.0000]

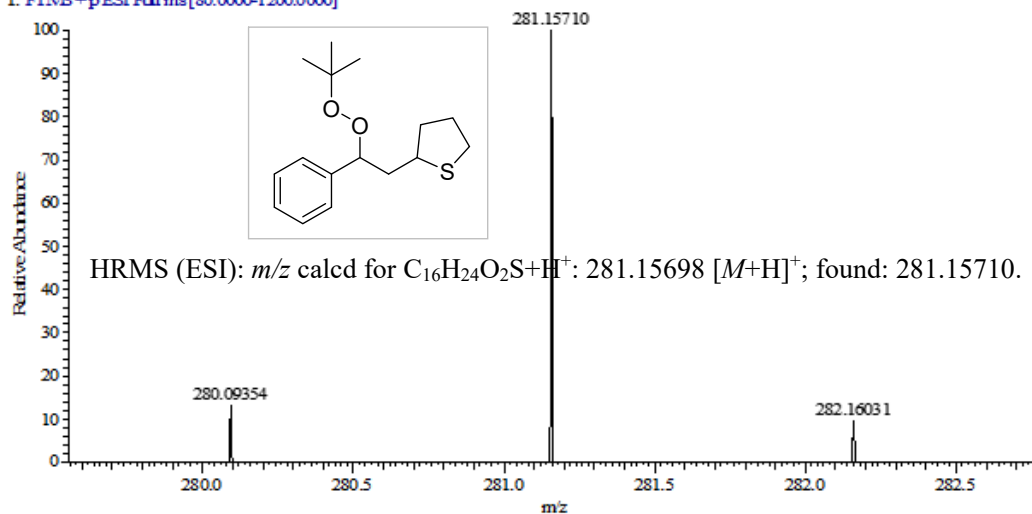

HRMS spectrum of product Compound J

Yanzhan-7 #11 RT: 0.06 AV: 1 NL: 9.64E5  
T: FTMS + pESI Full lock ms [80.0000-1200.0000]

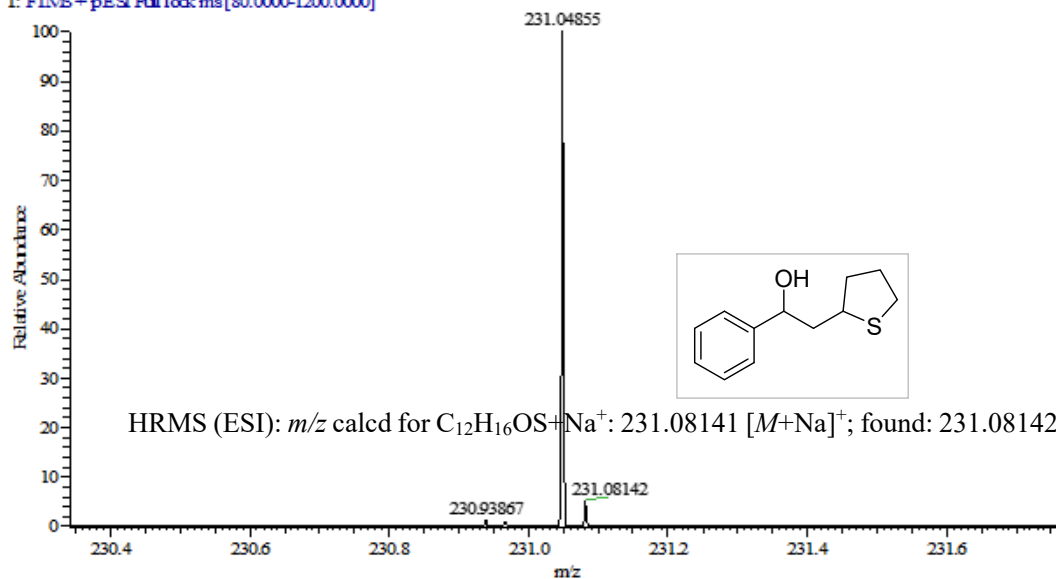

HRMS spectrum of product Compound K

#### 4.5. Studies on Reaction Stereo Selectivity

##### Asymmetric Synthesis

In a 15 mL tube with a stir bar, firstly  $Cu(OAc)_2 \cdot H_2O$  (20 mg, 0.1 mmol, 20 mol%) and chiral ligand (10 mol%) were added, and it was charged with 3.0 mL diethyl ether. Then DBU (152 mg, 1.0 mmol, 2.0 equiv) and TBHP (643 mg, 5.0 mmol, 10.0 equiv) were added. At last, styrene (52 mg, 0.5 mmol, 1.0 equiv) was added into the reaction system.

The tube was sealed with a teflon coated cap and then the reaction mixture was stirred at 30 °C for 24 h. When the reaction got complete, take the reaction mixture to be analyzed by HPLC, using elute (*n*-hexane/isopropanol=200/1, v/v), and the flow rate was 0.4 mL/min.

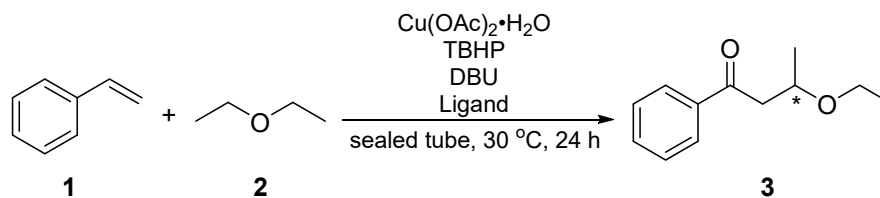

### Copies of the HPLC Spectra

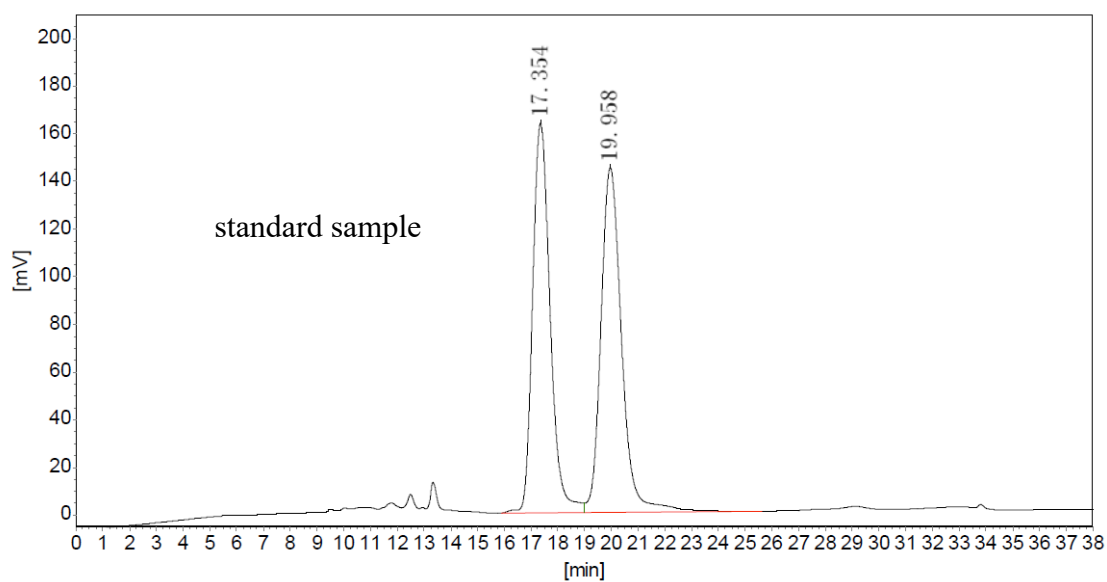

| RT/min | Contents/% |
|--------|------------|
| 17.354 | 48.8850    |
| 19.958 | 51.1150    |

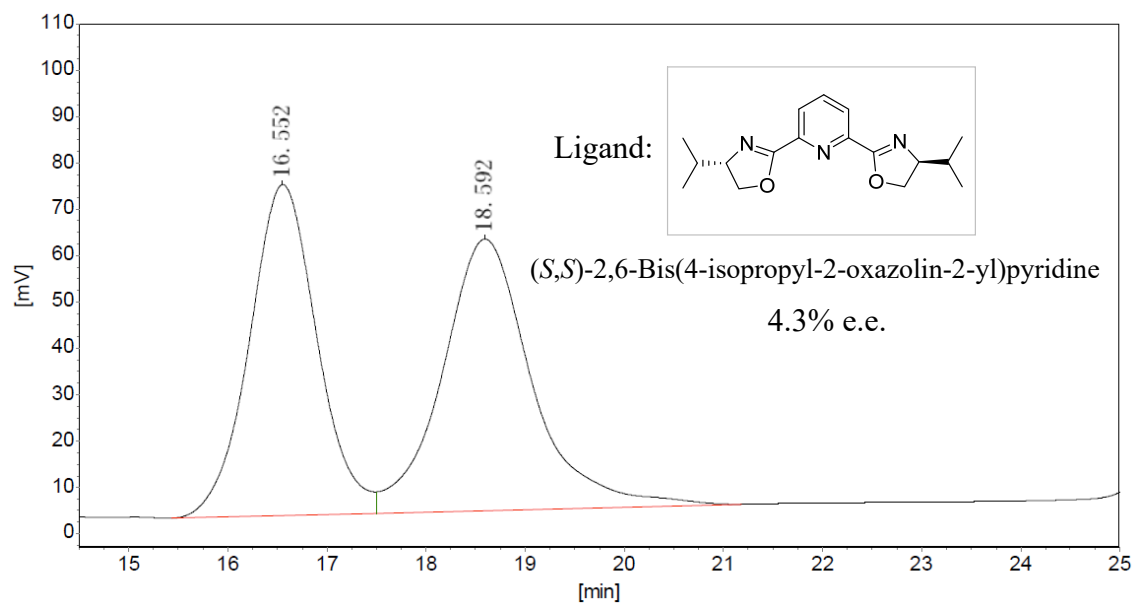

## 5. Characterization Data of All Products

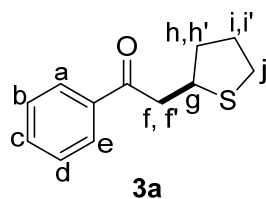

**phenyl-2-(tetrahydrothiophen-2-yl)ethan-1-one (3a):** yellow oil, 39% yield (16.1 mg),  $R_f = 0.46$  (petroleum ether/ethyl acetate = 10/1, v/v).  $^1\text{H NMR}$  (400 MHz,  $\text{CDCl}_3$ )  $\delta$  7.96 – 7.94 (m, 2H,  $\text{H}_a, \text{H}_e$ ), 7.58 – 7.53 (m, 1H,  $\text{H}_c$ ), 7.48 – 7.43 (m, 2H,  $\text{H}_b, \text{H}_d$ ), 3.90 (m, 1H,  $\text{H}_g$ ), 3.31 (d,  $J = 6.8$  Hz, 2H,  $\text{H}_f, \text{H}_f'$ ), 2.94 – 2.84 (m, 2H,  $\text{H}_j$ ), 2.28 – 2.21 (m, 1H,  $\text{H}_h$ ), 2.14 – 2.05 (m, 1H,  $\text{H}_h'$ ), 2.01 – 1.91 (m, 1H,  $\text{H}_i$ ), 1.68 – 1.59 (m, 1H,  $\text{H}_i'$ ).  $^{13}\text{C NMR}$  (100 MHz,  $\text{CDCl}_3$ )  $\delta$  198.42, 136.71, 133.20, 128.63, 128.08, 46.66, 43.23, 37.02, 32.46, 30.27. HRMS (ESI):  $m/z$  calcd for  $\text{C}_{12}\text{H}_{14}\text{OS}+\text{Na}^+$ : 229.0658  $[\text{M}+\text{Na}]^+$ ; found: 229.0660.

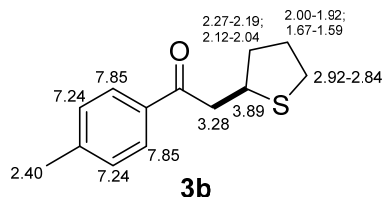

**2-(tetrahydrothiophen-2-yl)-1-(*p*-tolyl)ethan-1-one (3b):** colorless oil, 48% yield (21.1 mg),  $R_f = 0.39$  (petroleum ether/ethyl acetate = 10/1, v/v).  $^1\text{H NMR}$  (400 MHz,  $\text{CDCl}_3$ )  $\delta$  7.85 (d,  $J = 8.0$  Hz, 2H), 7.24 (d,  $J = 8.0$  Hz, 2H), 3.89 (m, 1H), 3.28 (d,  $J = 6.8$  Hz, 2H), 2.92 – 2.84 (m, 2H), 2.40 (s, 3H), 2.27 – 2.19 (m, 1H), 2.12 – 2.04 (m, 1H), 2.00 – 1.92 (m, 1H), 1.67 – 1.59 (m, 1H).  $^{13}\text{C NMR}$  (100 MHz,  $\text{CDCl}_3$ )  $\delta$  198.01, 143.94, 134.29, 129.27, 128.19, 46.49, 43.35, 37.02, 32.43, 30.25, 21.64. HRMS (ESI):  $m/z$  calcd for  $\text{C}_{13}\text{H}_{16}\text{OS}+\text{Na}^+$ : 243.0814  $[\text{M}+\text{Na}]^+$ ; found: 243.0815.

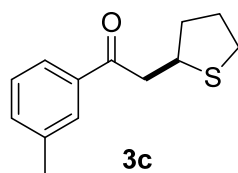

**2-(tetrahydrothiophen-2-yl)-1-(*m*-tolyl)ethan-1-one (3c):** light yellow oil, 52% yield (23.0 mg),  $R_f = 0.43$  (petroleum ether/ethyl acetate = 10/1, v/v).  $^1\text{H NMR}$  (400 MHz,  $\text{CDCl}_3$ )  $\delta$  7.76 – 7.73 (m, 2H), 7.38 – 7.32 (m, 2H), 3.90 (m, 1H), 3.29 (d,  $J = 6.8$  Hz,

2H), 2.92 – 2.83 (m, 2H), 2.40 (s, 3H), 2.28 – 2.20 (m, 1H), 2.14 – 2.05 (m, 1H), 2.01 – 1.91 (m, 1H), 1.67 – 1.59 (m, 1H). <sup>13</sup>C NMR (100 MHz, CDCl<sub>3</sub>) δ 198.58, 138.39, 136.78, 133.92, 128.59, 128.48, 125.29, 46.68, 43.29, 37.01, 32.43, 30.25, 21.35. HRMS (EI): *m/z* calcd for C<sub>13</sub>H<sub>16</sub>OS<sup>+</sup>: 220.09164 [*M*]<sup>+</sup>; found: 220.09145.

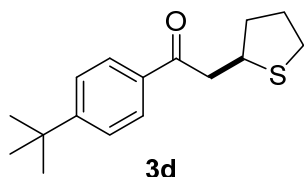

**1-(4-(*tert*-butyl)phenyl)-2-(tetrahydrothiophen-2-yl)ethan-1-one (3d):** yellow oil, 65% yield (34.1 mg), *R<sub>f</sub>* = 0.45 (petroleum ether/ethyl acetate = 10/1, v/v). <sup>1</sup>H NMR (400 MHz, CDCl<sub>3</sub>) δ 7.90 (d, *J* = 8.4 Hz, 2H), 7.47 (d, *J* = 8.4 Hz, 2H), 3.91 (m, 1H), 3.29 (dd, *J* = 7.0, 1.6 Hz, 2H), 2.92 – 2.84 (m, 2H), 2.27 – 2.20 (m, 1H), 2.12 – 2.06 (m, 1H), 2.00 – 1.91 (m, 1H), 1.68 – 1.59 (m, 1H), 1.34 (s, 9H). <sup>13</sup>C NMR (100 MHz, CDCl<sub>3</sub>) δ 198.01, 156.88, 134.21, 128.05, 125.54, 46.49, 43.36, 37.03, 35.10, 32.42, 31.09, 30.25. HRMS (ESI): *m/z* calcd for C<sub>16</sub>H<sub>22</sub>OS+Na<sup>+</sup>: 285.1284 [*M*+Na]<sup>+</sup>; found: 285.1284.

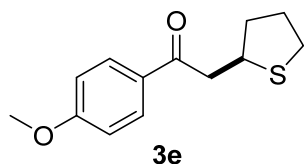

**1-(4-methoxyphenyl)-2-(tetrahydrothiophen-2-yl)ethan-1-one (3e):** orange oil, 33% yield (15.6 mg), *R<sub>f</sub>* = 0.36 (petroleum ether/ethyl acetate = 10/1, v/v). <sup>1</sup>H NMR (400 MHz, CDCl<sub>3</sub>) δ 7.93 (d, *J* = 8.8 Hz, 2H), 6.92 (d, *J* = 8.4 Hz, 2H), 3.93 – 3.87 (m, 1H), 3.86 (s, 3H), 3.25 (d, *J* = 6.8 Hz, 2H), 2.89 – 2.85 (m, 2H), 2.27 – 2.19 (m, 1H), 2.12 – 2.06 (m, 1H), 1.99 – 1.92 (m, 1H), 1.68 – 1.59 (m, 1H). <sup>13</sup>C NMR (100 MHz, CDCl<sub>3</sub>) δ 196.92, 163.54, 130.34, 129.87, 113.73, 55.47, 46.23, 43.47, 37.03, 32.42, 30.24. HRMS (ESI): *m/z* calcd for C<sub>13</sub>H<sub>16</sub>O<sub>2</sub>S+Na<sup>+</sup>: 259.0763 [*M*+Na]<sup>+</sup>; found: 259.0764.

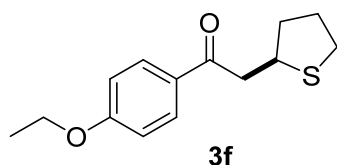

**1-(4-ethoxyphenyl)-2-(tetrahydrothiophen-2-yl)ethan-1-one (3f):** brown oil, 34% yield (17.0 mg),  $R_f = 0.27$  (petroleum ether/ethyl acetate = 10/1, v/v).  $^1\text{H NMR}$  (400 MHz,  $\text{CDCl}_3$ )  $\delta$  7.92 (d,  $J = 8.8$  Hz, 2H), 6.91 (d,  $J = 8.8$  Hz, 2H), 4.09 (q,  $J = 6.8$  Hz, 2H), 3.89 (m, 1H), 3.25 (d,  $J = 6.8$  Hz, 2H), 2.94 – 2.83 (m, 2H), 2.27 – 2.20 (m, 1H), 2.14 – 2.05 (m, 1H), 2.01 – 1.90 (m, 1H), 1.68 – 1.59 (m, 1H), 1.44 (t,  $J = 6.8$  Hz, 3H).  $^{13}\text{C NMR}$  (100 MHz,  $\text{CDCl}_3$ )  $\delta$  197.06, 163.18, 130.53, 129.98, 114.39, 63.95, 46.39, 43.72, 37.24, 32.58, 30.42, 14.82. HRMS (EI):  $m/z$  calcd for  $\text{C}_{14}\text{H}_{18}\text{O}_2\text{S}^+$ : 250.10220  $[M]^+$ ; found: 250.10217.

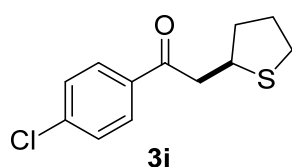

**1-(4-chlorophenyl)-2-(tetrahydrothiophen-2-yl)ethan-1-one (3i):** yellow oil, 42% yield (20.2 mg),  $R_f = 0.38$  (petroleum ether/ethyl acetate = 10/1, v/v).  $^1\text{H NMR}$  (400 MHz,  $\text{CDCl}_3$ )  $\delta$  7.89 (d,  $J = 8.4$  Hz, 2H), 7.43 (d,  $J = 8.8$  Hz, 2H), 3.88 (m, 1H), 3.28 (d,  $J = 7.2$  Hz, 2H), 2.94 – 2.84 (m, 2H), 2.27 – 2.21 (m, 1H), 2.13 – 2.05 (m, 1H), 2.00 – 1.91 (m, 1H), 1.67 – 1.59 (m, 1H).  $^{13}\text{C NMR}$  (100 MHz,  $\text{CDCl}_3$ )  $\delta$  197.15, 139.61, 135.03, 129.49, 128.92, 46.62, 43.11, 36.99, 32.45, 30.24. HRMS (EI):  $m/z$  calcd for  $\text{C}_{12}\text{H}_{13}\text{ClOS}^+$ : 240.03701  $[M]^+$ ; found: 240.03690.

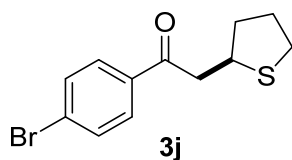

**1-(4-bromophenyl)-2-(tetrahydrothiophen-2-yl)ethan-1-one (3j):** yellow oil, 58% yield (32.9 mg),  $R_f = 0.41$  (petroleum ether/ethyl acetate = 10/1, v/v).  $^1\text{H NMR}$  (400 MHz,  $\text{CDCl}_3$ )  $\delta$  7.82 – 7.79 (m, 2H), 7.60 – 7.57 (m, 2H), 3.91 – 3.84 (m, 1H), 3.27 (dd,  $J = 6.8, 2.4$  Hz, 2H), 2.91 – 2.85 (m, 2H), 2.26 – 2.21 (m, 1H), 2.11 – 2.06 (m, 1H), 2.00 – 1.94 (m, 1H), 1.66 – 1.59 (m, 1H).  $^{13}\text{C NMR}$  (100 MHz,  $\text{CDCl}_3$ )  $\delta$  197.33, 135.43, 131.91, 129.60, 128.35, 46.61, 43.10, 36.99, 32.46, 30.25. HRMS (EI):  $m/z$  calcd for  $\text{C}_{12}\text{H}_{13}\text{BrOS}^+$ : 283.98650  $[M]^+$ ; found: 283.98630.

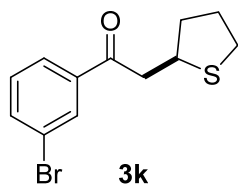

**1-(3-bromophenyl)-2-(tetrahydrothiophen-2-yl)ethan-1-one (3k):** yellow oil, 57% yield (32.4 mg),  $R_f = 0.38$  (petroleum ether/ethyl acetate = 10/1, v/v).  $^1\text{H NMR}$  (400 MHz,  $\text{CDCl}_3$ )  $\delta$  8.07 (d,  $J = 2.0$  Hz, 1H), 7.87 (d,  $J = 9.2$  Hz, 1H), 7.68 (d,  $J = 7.6$  Hz, 1H), 7.34 (td,  $J = 7.4, 3.2$  Hz, 1H), 3.92 – 3.85 (m, 1H), 3.28 (dd,  $J = 7.0, 2.4$  Hz, 2H), 2.90 – 2.88 (m, 2H), 2.28 – 2.21 (m, 1H), 2.13 – 2.05 (m, 1H), 2.01 – 1.93 (m, 1H), 1.68 – 1.59 (m, 1H).  $^{13}\text{C NMR}$  (100 MHz,  $\text{CDCl}_3$ )  $\delta$  197.00, 138.44, 136.01, 131.15, 130.23, 126.59, 122.99, 46.76, 43.01, 36.97, 32.47, 30.25. HRMS (EI):  $m/z$  calcd for  $\text{C}_{12}\text{H}_{13}\text{BrOS}^+$ : 283.98650 [ $M$ ] $^+$ ; found: 283.98621.

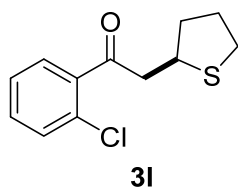

**1-(2-chlorophenyl)-2-(tetrahydrothiophen-2-yl)ethan-1-one (3l):** yellow oil, 50% yield (24.0 mg),  $R_f = 0.48$  (petroleum ether/ethyl acetate = 10/1, v/v).  $^1\text{H NMR}$  (400 MHz,  $\text{CDCl}_3$ )  $\delta$  7.51 – 7.45 (m, 1H), 7.43 – 7.35 (m, 2H), 7.34 – 7.30 (m, 1H), 3.87 (m, 1H), 3.28 (m, 2H), 2.93 – 2.82 (m, 2H), 2.26 – 2.19 (m, 1H), 2.12 – 2.03 (m, 1H), 2.00 – 1.91 (m, 1H), 1.69 – 1.61 (m, 1H).  $^{13}\text{C NMR}$  (100 MHz,  $\text{CDCl}_3$ )  $\delta$  201.49, 139.14, 131.79, 130.90, 130.53, 129.07, 126.96, 50.88, 43.25, 36.94, 32.49, 30.19. HRMS (EI):  $m/z$  calcd for  $\text{C}_{12}\text{H}_{13}\text{ClOS}^+$ : 240.03701 [ $M$ ] $^+$ ; found: 240.03688.

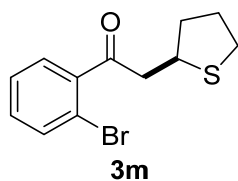

**1-(2-bromophenyl)-2-(tetrahydrothiophen-2-yl)ethan-1-one (3m):** yellow oil, 31% yield (17.6 mg),  $R_f = 0.45$  (petroleum ether/ethyl acetate = 10/1, v/v).  $^1\text{H NMR}$  (400 MHz,  $\text{CDCl}_3$ )  $\delta$  7.60 (d,  $J = 8.0$  Hz, 1H), 7.43 – 7.33 (m, 2H), 7.31 – 7.27 (m, 1H), 3.87 (m, 1H), 3.26 (m, 2H), 2.94 – 2.83 (m, 2H), 2.28 – 2.20 (m, 1H), 2.13 – 2.03 (m, 1H),



2.01 – 1.92 (m, 1H), 1.71 – 1.61 (m, 1H).  $^{13}\text{C}$  NMR (100 MHz,  $\text{CDCl}_3$ )  $\delta$  202.32, 141.43, 133.70, 131.64, 128.60, 127.45, 118.67, 50.57, 43.18, 36.95, 32.51, 30.20. HRMS (EI):  $m/z$  calcd for  $\text{C}_{12}\text{H}_{13}\text{BrOS}^+$ : 283.98650 [ $M$ ] $^+$ ; found: 283.98627.

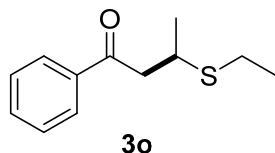

**3-(ethylthio)-1-phenylbutan-1-one (3o)**: light yellow oil, 21% yield (8.7 mg),  $R_f$  = 0.57 (petroleum ether/ethyl acetate = 10/1, v/v).  $^1\text{H}$  NMR (300 MHz,  $\text{CDCl}_3$ )  $\delta$  7.98 – 7.95 (m, 2H), 7.61 – 7.55 (m, 1H), 7.50 – 7.44 (m, 2H), 3.54 – 3.43 (m, 1H), 3.30 (dd,  $J$  = 16.8, 5.1 Hz, 1H), 3.10 (dd,  $J$  = 16.8, 8.4 Hz, 1H), 2.61 (q,  $J$  = 7.2 Hz, 2H), 1.36 (d,  $J$  = 6.6 Hz, 3H), 1.27 (t,  $J$  = 7.5 Hz, 3H).  $^{13}\text{C}$  NMR (100 MHz,  $\text{CDCl}_3$ )  $\delta$  198.24, 137.03, 133.20, 128.66, 128.10, 46.16, 35.12, 24.87, 21.71, 14.80. HRMS (ESI):  $m/z$  calcd for  $\text{C}_{12}\text{H}_{16}\text{OS}+\text{Na}^+$ : 231.0814 [ $M+\text{Na}$ ] $^+$ ; found: 231.0816.

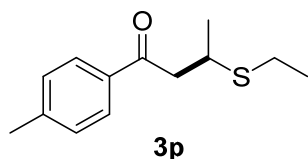

**3-(ethylthio)-1-(p-tolyl)butan-1-one (3p)**: yellow oil, 33% yield (14.7 mg),  $R_f$  = 0.54 (petroleum ether/ethyl acetate = 10/1, v/v).  $^1\text{H}$  NMR (400 MHz,  $\text{CDCl}_3$ )  $\delta$  7.88 (d,  $J$  = 7.6 Hz, 2H), 7.28 (d,  $J$  = 8.4 Hz, 2H), 3.53 – 3.45 (m, 1H), 3.28 (dd,  $J$  = 16.8, 5.2 Hz, 1H), 3.08 (dd,  $J$  = 16.6, 8.8 Hz, 1H), 2.62 (q,  $J$  = 7.4 Hz, 2H), 2.43 (s, 3H), 1.36 (d,  $J$  = 6.8 Hz, 3H), 1.28 (t,  $J$  = 7.6 Hz, 3H).  $^{13}\text{C}$  NMR (100 MHz,  $\text{CDCl}_3$ )  $\delta$  198.01, 144.14, 134.90, 129.49, 128.42, 46.30, 35.51, 25.05, 21.89, 21.74, 14.98. HRMS (EI):  $m/z$  calcd for  $\text{C}_{13}\text{H}_{18}\text{OS}^+$ : 222.10729 [ $M$ ] $^+$ ; found: 222.10706.

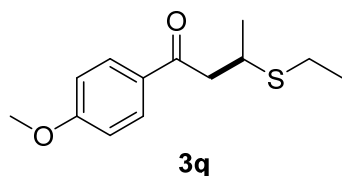

**3-(ethylthio)-1-(4-methoxyphenyl)butan-1-one (3q)**: yellow oil, 28% (13.3 mg),  $R_f$  = 0.33 (petroleum ether/ethyl acetate = 10/1, v/v).  $^1\text{H}$  NMR (400 MHz,  $\text{CDCl}_3$ )  $\delta$  7.94 (d,  $J$  = 8.8 Hz, 2H), 6.94 (d,  $J$  = 8.4 Hz, 2H), 3.87 (s, 3H), 3.51 – 3.43 (m, 1H), 3.24 (dd,  $J$  = 16.4, 5.2 Hz, 1H), 3.03 (dd,  $J$  = 16.4, 8.4 Hz, 1H), 2.60 (q,  $J$  = 7.2 Hz, 2H),

1.34 (d,  $J = 6.8$  Hz, 3H), 1.26 (t,  $J = 7.6$  Hz, 3H).  $^{13}\text{C}$  NMR (100 MHz,  $\text{CDCl}_3$ )  $\delta$  196.88, 163.83, 130.57, 130.50, 114.00, 55.63, 46.07, 35.64, 25.06, 21.91, 14.98. HRMS (EI):  $m/z$  calcd for  $\text{C}_{13}\text{H}_{18}\text{O}_2\text{S}^+$ : 238.10220 [ $M$ ] $^+$ ; found: 238.10201.

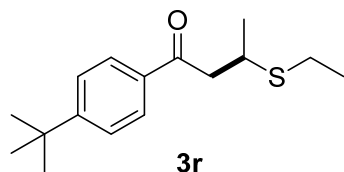

**1-(4-(*tert*-butyl)phenyl)-3-(ethylthio)butan-1-one (3r)**: yellow oil, 48% yield (25.3 mg),  $R_f = 0.56$  (petroleum ether/ethyl acetate = 10/1, v/v).  $^1\text{H}$  NMR (400 MHz,  $\text{CDCl}_3$ )  $\delta$  7.90 (d,  $J = 8.0$  Hz, 2H), 7.48 (d,  $J = 8.4$  Hz, 2H), 3.53 – 3.44 (m, 1H), 3.27 (dd,  $J = 16.8, 5.2$  Hz, 1H), 3.07 (dd,  $J = 16.6, 8.8$  Hz, 1H), 2.61 (q,  $J = 7.6$  Hz, 2H), 1.34 (s, 12H), 1.27 (t,  $J = 8.4$  Hz, 3H).  $^{13}\text{C}$  NMR (100 MHz,  $\text{CDCl}_3$ )  $\delta$  198.00, 157.14, 134.78, 128.27, 125.75, 46.33, 35.49, 35.29, 31.26, 25.05, 21.89, 14.99. HRMS (EI):  $m/z$  calcd for  $\text{C}_{16}\text{H}_{24}\text{OS}^+$ : 264.15424 [ $M$ ] $^+$ ; found: 264.15417.

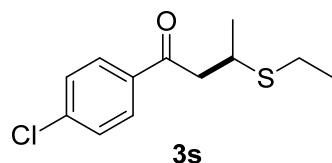

**1-(4-chlorophenyl)-3-(ethylthio)butan-1-one (3s)**: yellow oil, 19% yield (9.2 mg),  $R_f = 0.59$  (petroleum ether/ethyl acetate = 10/1, v/v).  $^1\text{H}$  NMR (400 MHz,  $\text{CDCl}_3$ )  $\delta$  7.89 (d,  $J = 5.6$  Hz, 2H), 7.44 (d,  $J = 6.0$  Hz, 2H), 3.45 (q,  $J = 6.8$  Hz, 1H), 3.26 (dd,  $J = 16.8, 3.2$  Hz, 1H), 3.05 (dd,  $J = 16.8, 8.4$  Hz, 1H), 2.60 (q,  $J = 9.6$  Hz, 2H), 1.35 (d,  $J = 4.0$  Hz, 3H), 1.27 (t,  $J = 7.2$  Hz, 3H).  $^{13}\text{C}$  NMR (100 MHz,  $\text{CDCl}_3$ )  $\delta$  197.13, 139.87, 135.67, 129.69, 129.15, 46.39, 35.42, 25.11, 21.94, 14.96. HRMS (EI):  $m/z$  calcd for  $\text{C}_{12}\text{H}_{15}\text{ClOS}^+$ : 242.05266 [ $M$ ] $^+$ ; found: 242.05259.

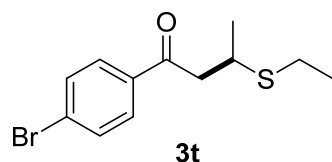

**1-(4-bromophenyl)-3-(ethylthio)butan-1-one (3t)**: yellow oil, 34% yield (19.4 mg),  $R_f = 0.51$  (petroleum ether/ethyl acetate = 10/1, v/v).  $^1\text{H}$  NMR (400 MHz,  $\text{CDCl}_3$ )  $\delta$

7.81 (d,  $J = 8.4$  Hz, 2H), 7.60 (d,  $J = 8.4$  Hz, 2H), 3.45 (h,  $J = 6.8$  Hz, 1H), 3.25 (dd,  $J = 16.8, 5.2$  Hz, 1H), 3.04 (dd,  $J = 16.8, 8.0$  Hz, 1H), 2.59 (q,  $J = 7.2$  Hz, 2H), 1.35 (d,  $J = 6.8$  Hz, 3H), 1.26 (d,  $J = 7.2$  Hz, 3H).  $^{13}\text{C}$  NMR (100 MHz,  $\text{CDCl}_3$ )  $\delta$  197.33, 136.04, 132.16, 129.80, 128.56, 46.36, 35.40, 25.11, 21.94, 14.96. HRMS (EI):  $m/z$  calcd for  $\text{C}_{12}\text{H}_{15}\text{BrOS}^+$ : 286.00215 [ $M$ ] $^+$ ; found: 286.00194.

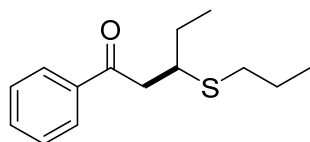

**3u**

**phenyl-3-(propylthio)pentan-1-one (3u)**: yellow oil, 12% yield (5.7 mg),  $R_f = 0.59$  (petroleum ether/ethyl acetate = 10/1, v/v).  $^1\text{H}$  NMR (400 MHz,  $\text{CDCl}_3$ )  $\delta$  7.98 (d,  $J = 8.0$  Hz, 2H), 7.59 (t,  $J = 6.4$  Hz, 1H), 7.49 (t,  $J = 7.6$  Hz, 2H), 3.33 – 3.29 (m, 2H), 3.21 – 3.15 (m, 1H), 2.54 (t,  $J = 6.8$  Hz, 2H), 1.73 – 1.61 (m, 4H), 1.05 (t,  $J = 7.6$  Hz, 3H), 0.98 (t,  $J = 8.0$  Hz, 3H).  $^{13}\text{C}$  NMR (100 MHz,  $\text{CDCl}_3$ )  $\delta$  198.77, 137.48, 133.25, 128.80, 128.31, 44.81, 42.86, 33.53, 28.45, 23.36, 13.71, 11.43. HRMS (EI):  $m/z$  calcd for  $\text{C}_{14}\text{H}_{20}\text{OS}^+$ : 236.12294 [ $M$ ] $^+$ ; found: 236.12266.

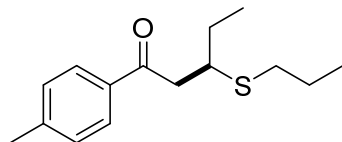

**3v**

**3-(propylthio)-1-(p-tolyl)pentan-1-one (3v)**: yellow oil, 24% yield (12.0 mg),  $R_f = 0.53$  (petroleum ether/ethyl acetate = 10/1, v/v).  $^1\text{H}$  NMR (400 MHz,  $\text{CDCl}_3$ )  $\delta$  7.86 (d,  $J = 7.6$  Hz, 2H), 7.27 – 7.24 (m, 2H), 3.25 – 3.22 (m, 1H), 3.16 – 3.10 (m, 1H), 2.95 – 2.92 (m, 1H), 2.51 (t,  $J = 7.2$  Hz, 2H), 2.41 (s, 3H), 1.64 – 1.55 (m, 4H), 1.03 (t,  $J = 7.2$  Hz, 3H), 0.97 (t,  $J = 7.2$  Hz, 3H).  $^{13}\text{C}$  NMR (100 MHz,  $\text{CDCl}_3$ )  $\delta$  198.36, 144.02, 135.06, 129.46, 128.43, 44.70, 42.99, 33.53, 28.44, 23.37, 21.73, 13.68, 11.40. HRMS (EI):  $m/z$  calcd for  $\text{C}_{15}\text{H}_{22}\text{OS}^+$ : 250.13859 [ $M$ ] $^+$ ; found: 250.13832.

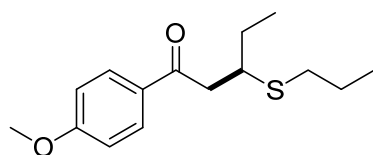

**3w**

**1-(4-methoxyphenyl)-3-(propylthio)pentan-1-one (3w):** brown oil, 21% yield (11.2 mg),  $R_f = 0.32$  (petroleum ether/ethyl acetate = 10/1, v/v).  $^1\text{H NMR}$  (400 MHz,  $\text{CDCl}_3$ )  $\delta$  7.95 (d,  $J = 8.8$  Hz, 2H), 6.94 (d,  $J = 8.8$  Hz, 2H), 3.87 (s, 3H), 3.29 – 3.25 (m, 1H), 3.21 – 3.11 (m, 1H), 3.10 – 2.89 (m, 1H), 2.53 – 2.49 (m, 2H), 1.70 – 1.55 (m, 4H), 1.02 (t,  $J = 7.2$  Hz, 3H), 0.96 (t,  $J = 7.2$  Hz, 3H).  $^{13}\text{C NMR}$  (100 MHz,  $\text{CDCl}_3$ )  $\delta$  197.29, 163.77, 130.58, 130.46, 113.98, 55.62, 44.45, 43.11, 33.54, 28.45, 23.37, 13.67, 11.39. HRMS (EI):  $m/z$  calcd for  $\text{C}_{15}\text{H}_{22}\text{O}_2\text{S}^+$ : 266.13350  $[M]^+$ ; found: 266.13328.

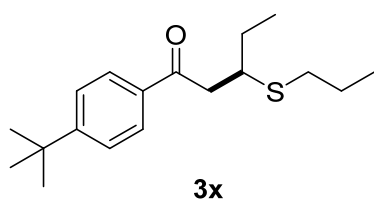

**1-(4-(tert-butyl)phenyl)-3-(propylthio)pentan-1-one (3x):** colorless oil, 27% yield (15.8 mg),  $R_f = 0.68$  (petroleum ether/ethyl acetate = 10/1, v/v).  $^1\text{H NMR}$  (400 MHz,  $\text{CDCl}_3$ )  $\delta$  7.93 (d,  $J = 8.4$  Hz, 2H), 7.50 (d,  $J = 8.0$  Hz, 2H), 3.31 – 3.25 (m, 2H), 3.20 – 3.15 (m, 1H), 2.54 (td,  $J = 7.2, 2.4$  Hz, 2H), 1.76 – 1.59 (m, 4H), 1.36 (s, 9H), 1.05 (t,  $J = 7.2$  Hz, 3H), 0.99 (t,  $J = 7.6$  Hz, 3H).  $^{13}\text{C NMR}$  (100 MHz,  $\text{CDCl}_3$ )  $\delta$  198.41, 157.05, 134.90, 128.29, 125.73, 44.72, 42.92, 35.29, 33.52, 31.27, 28.43, 23.37, 13.70, 11.42. HRMS (EI):  $m/z$  calcd for  $\text{C}_{18}\text{H}_{28}\text{OS}^+$ : 292.18554  $[M]^+$ ; found: 292.18533.

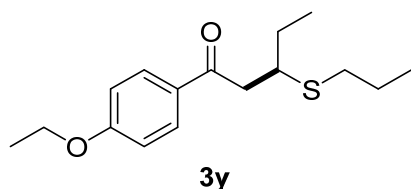

**1-(4-ethoxyphenyl)-3-(propylthio)pentan-1-one (3y):** orange oil, 21% yield (11.8 mg),  $R_f = 0.38$  (petroleum ether/ethyl acetate = 10/1, v/v).  $^1\text{H NMR}$  (400 MHz,  $\text{CDCl}_3$ )  $\delta$  7.93 (d,  $J = 7.2$  Hz, 2H), 6.92 (d,  $J = 7.6$  Hz, 2H), 4.10 (q,  $J = 6.4$  Hz, 2H), 3.29 – 3.25 (m, 1H), 3.21 – 3.11 (m, 1H), 3.09 – 2.89 (m, 1H), 2.51 (t,  $J = 6.8$  Hz, 2H), 1.70 – 1.55 (m, 4H), 1.44 (t,  $J = 7.2$  Hz, 3H), 1.03 (t,  $J = 7.2$  Hz, 3H), 0.97 (t,  $J = 7.2$  Hz, 3H).  $^{13}\text{C NMR}$  (100 MHz,  $\text{CDCl}_3$ )  $\delta$  197.23, 163.18, 130.58, 130.46, 114.44, 63.95, 44.43, 43.11, 33.53, 28.45, 23.37, 14.81, 13.68, 11.40. HRMS (ESI):  $m/z$  calcd for  $\text{C}_{15}\text{H}_{25}\text{O}_2\text{S}+\text{H}^+$ : 281.1570  $[M+\text{H}]^+$ ; found: 281.1563.

## 6. Copies of NMR Spectra of All Products

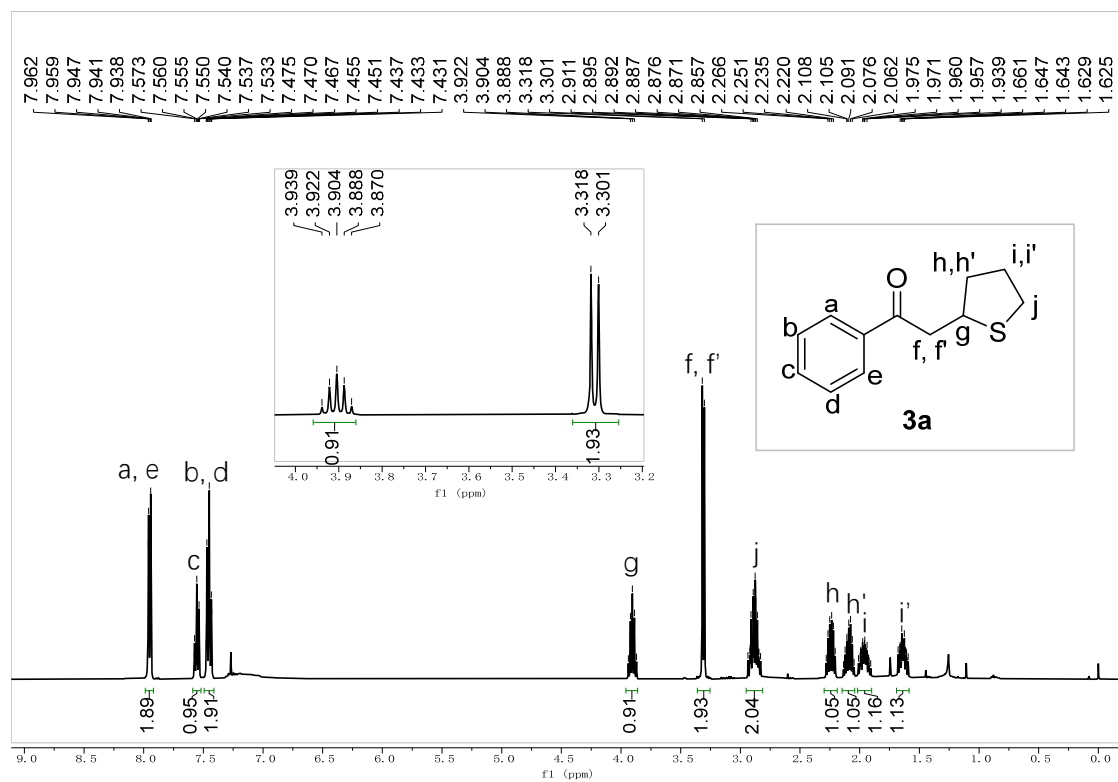

$^1\text{H}$  NMR spectrum of product **3a**

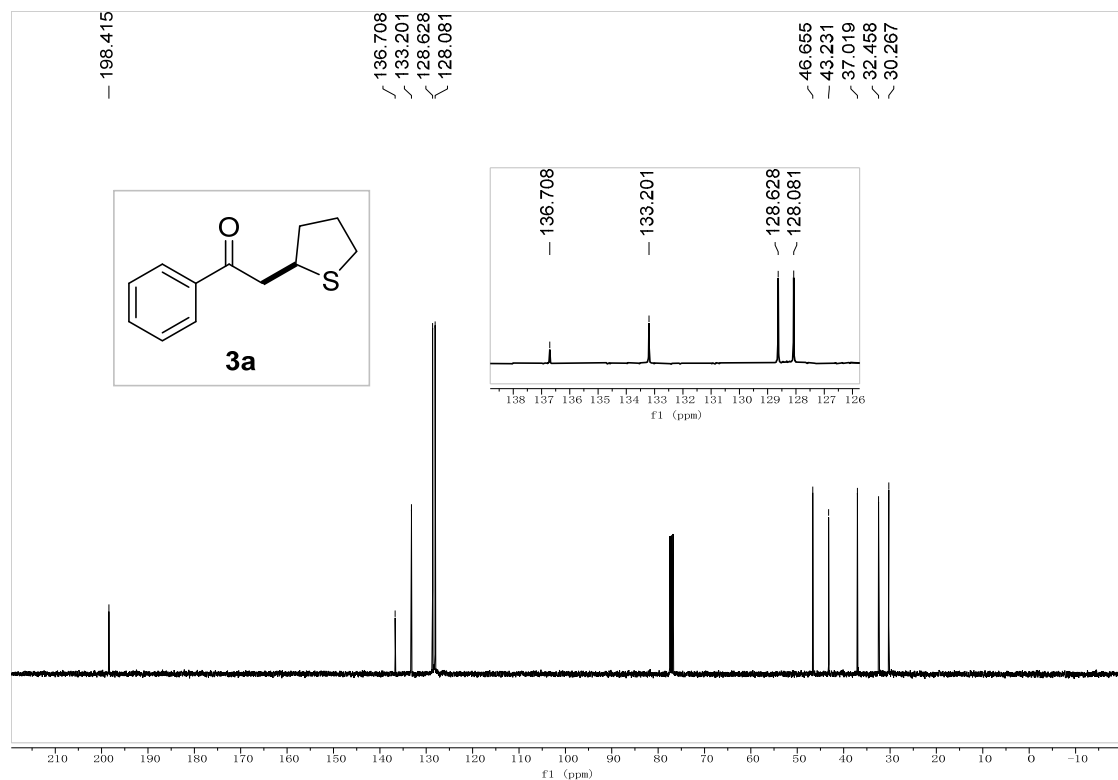

$^{13}\text{C}$  NMR spectrum of product **3a**

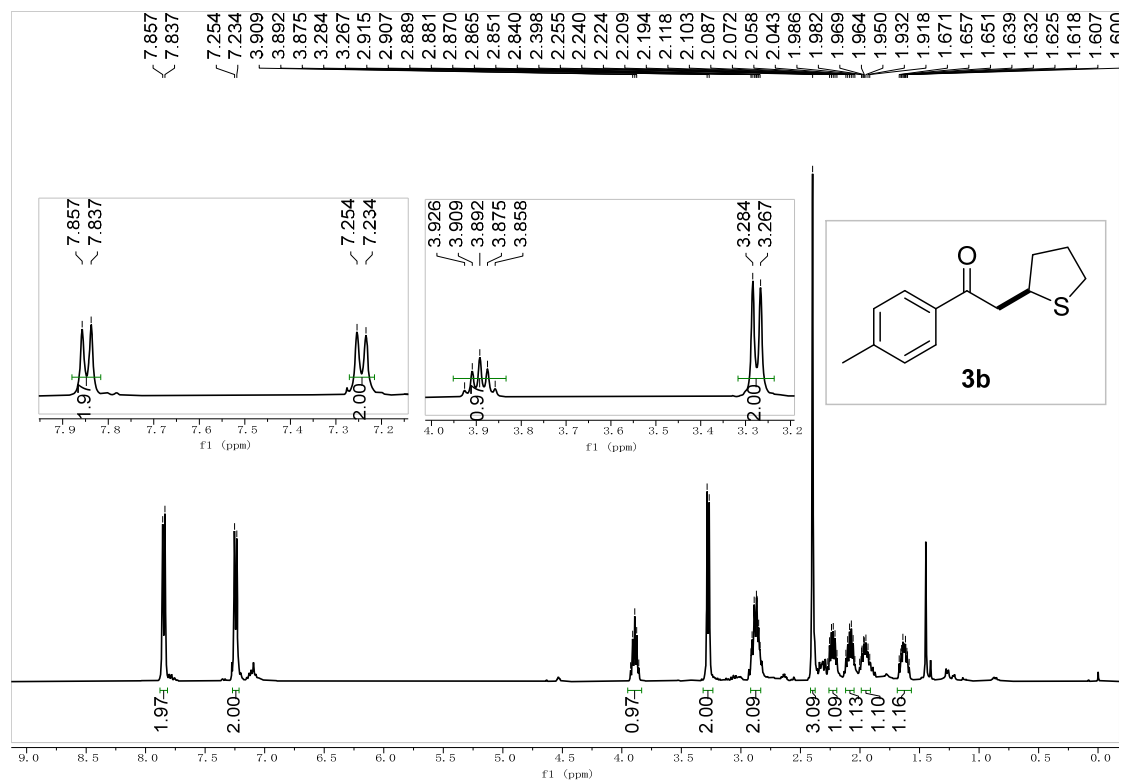

**<sup>1</sup>H NMR spectrum of product 3b**

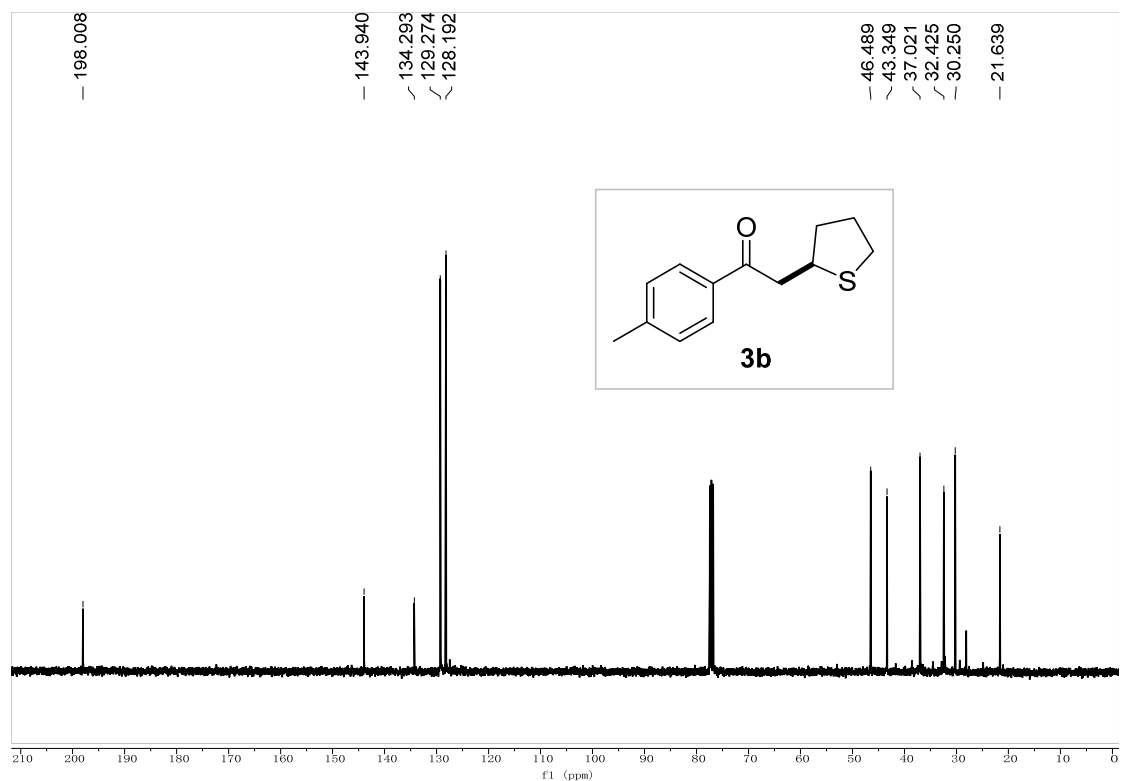

**<sup>13</sup>C NMR spectrum of product 3b**

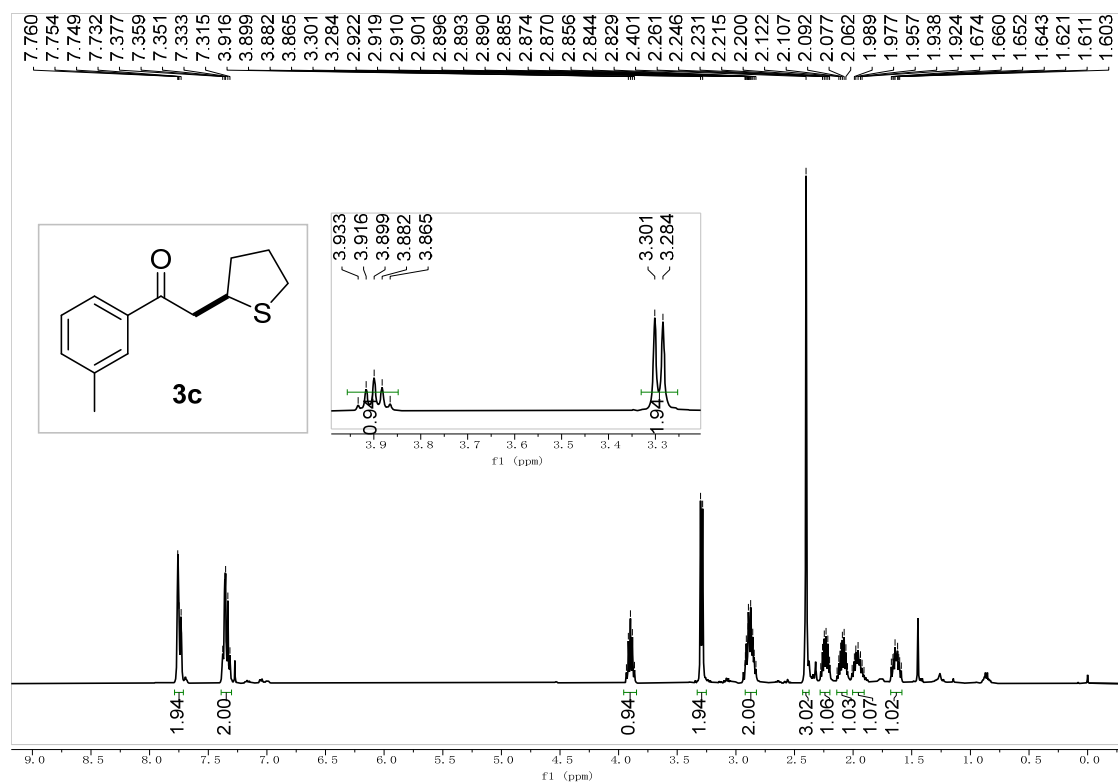

<sup>1</sup>H NMR spectrum of product 3c

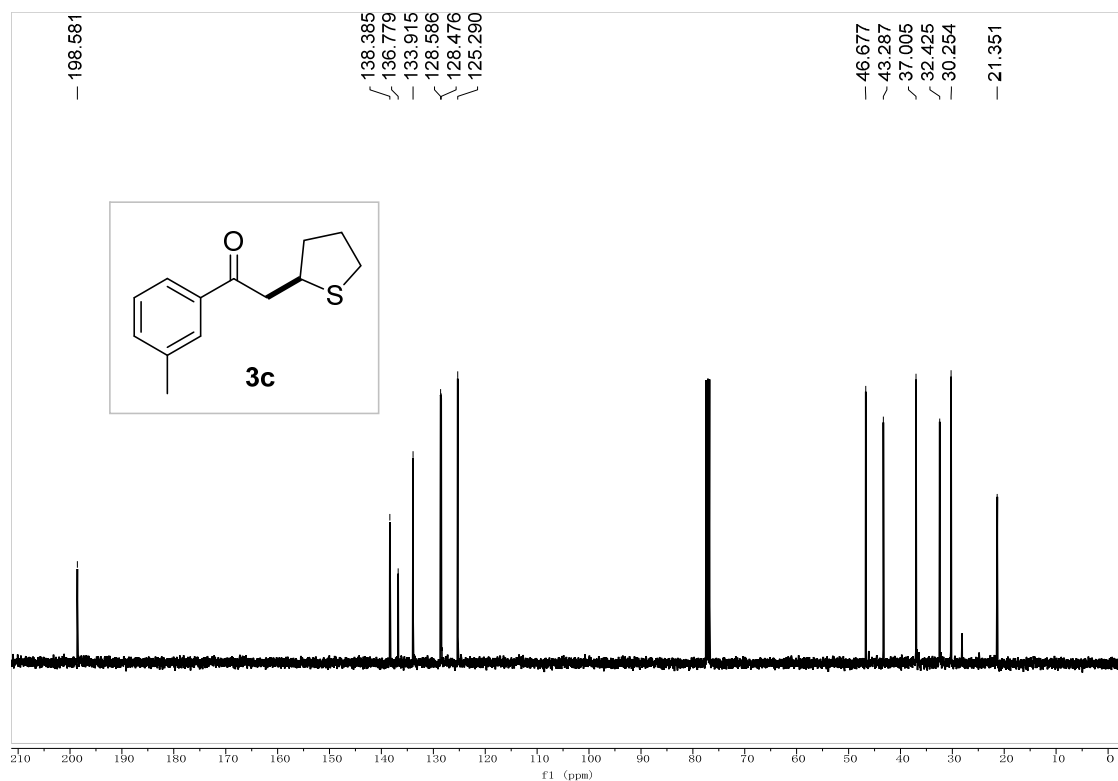

<sup>13</sup>C NMR spectrum of product 3c

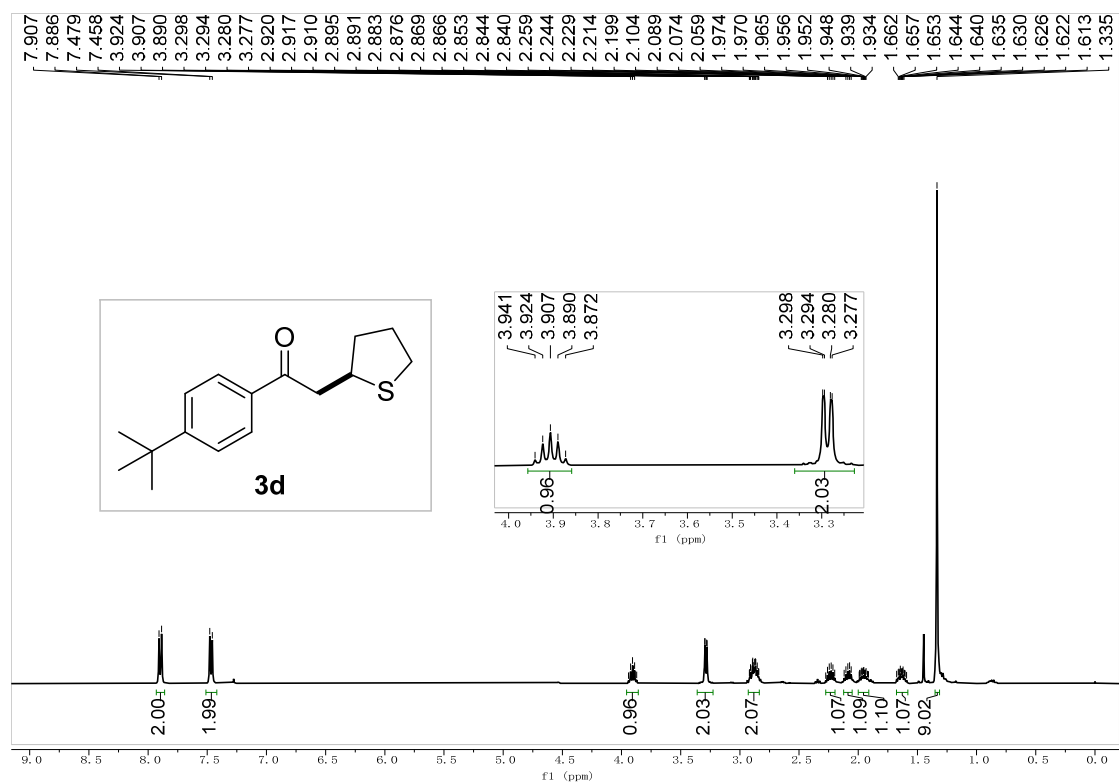

<sup>1</sup>H NMR spectrum of product 3d

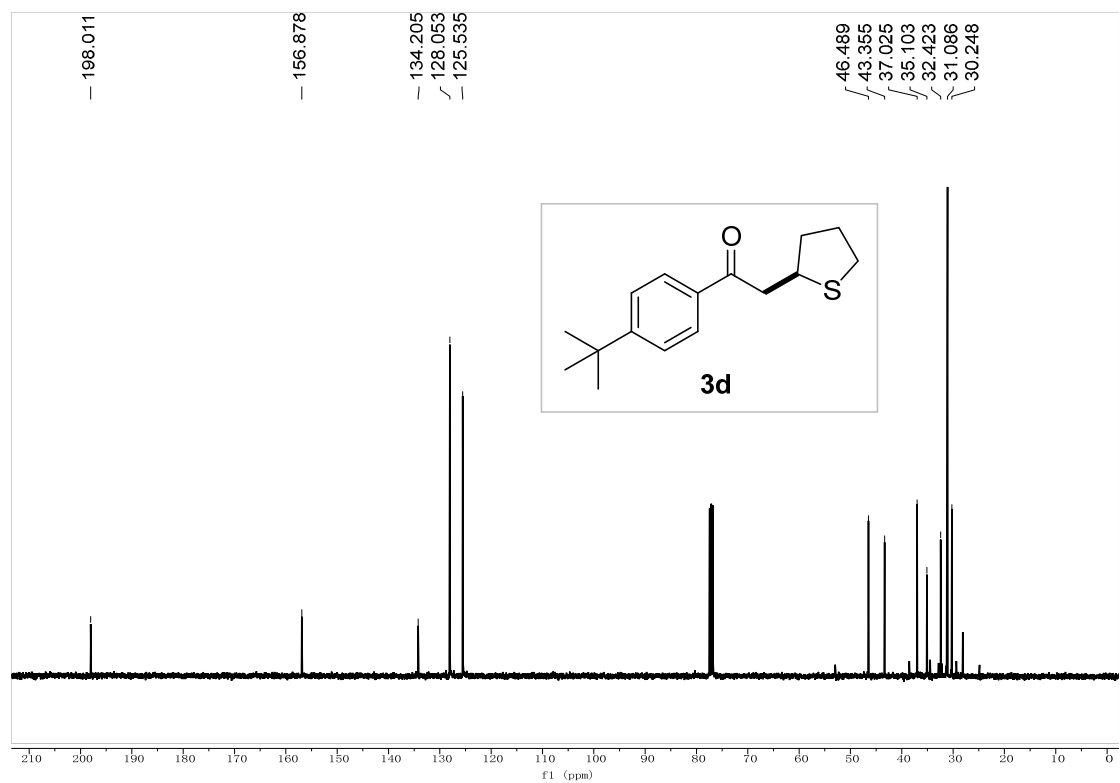

<sup>13</sup>C NMR spectrum of product 3d



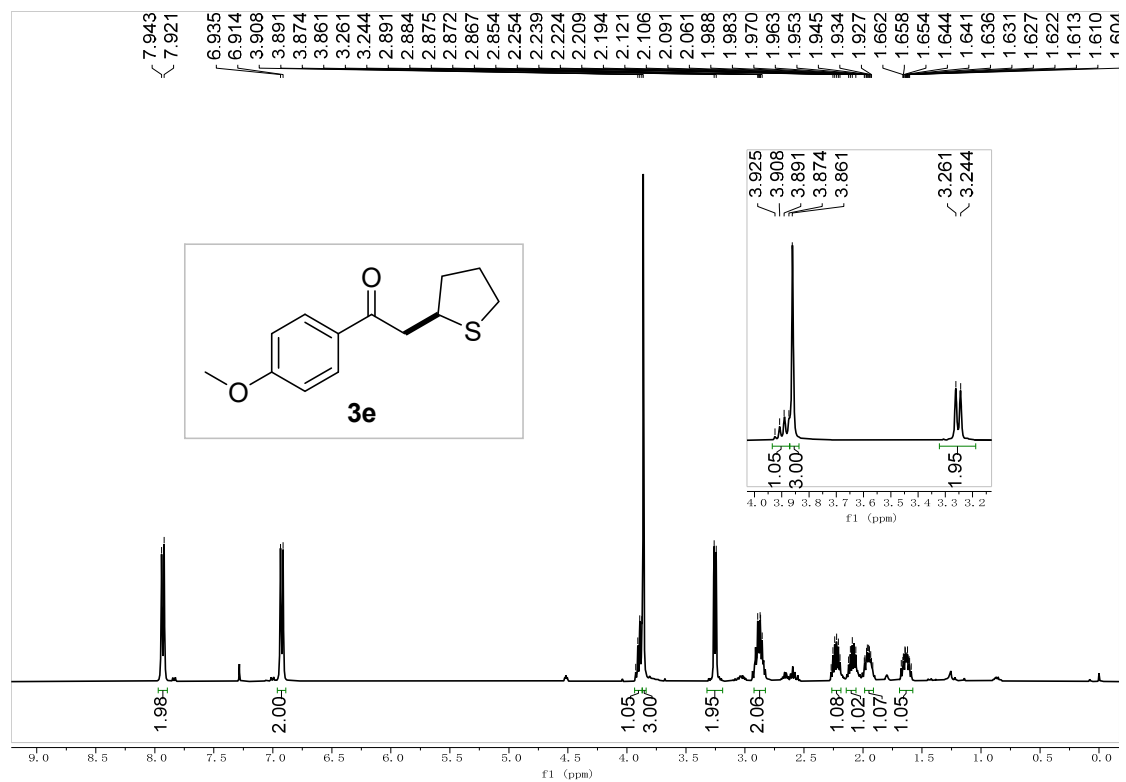

<sup>1</sup>H NMR spectrum of product **3e**

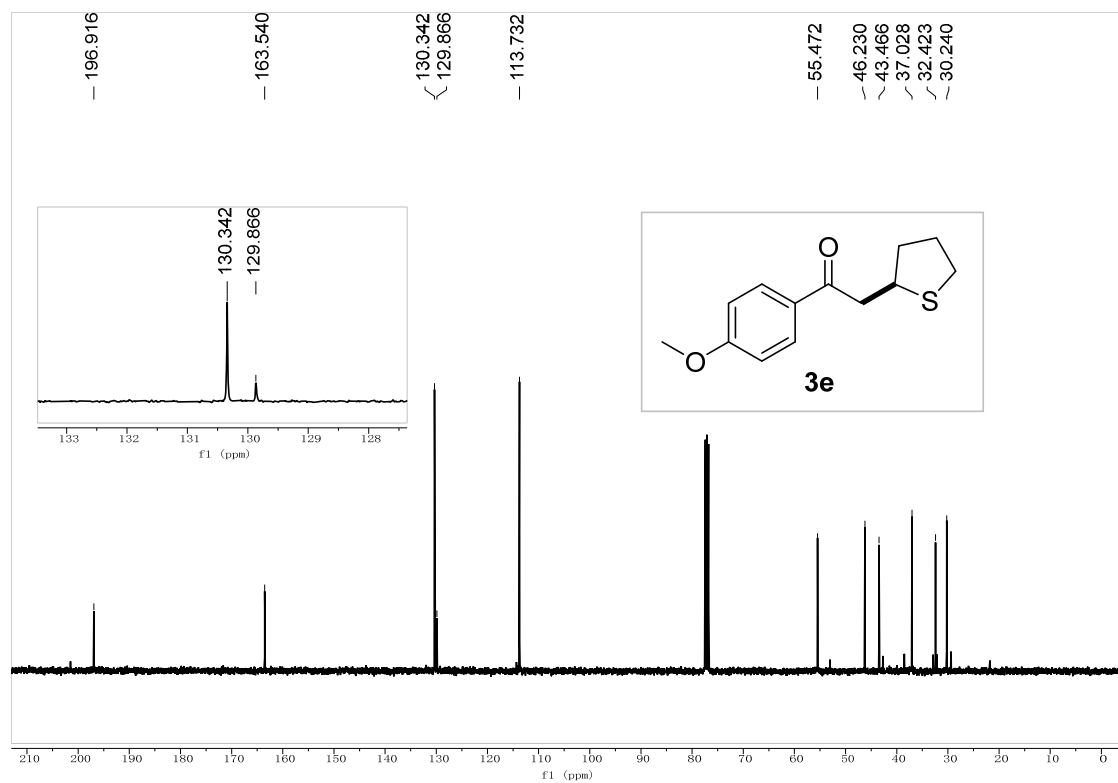

<sup>13</sup>C NMR spectrum of product **3e**

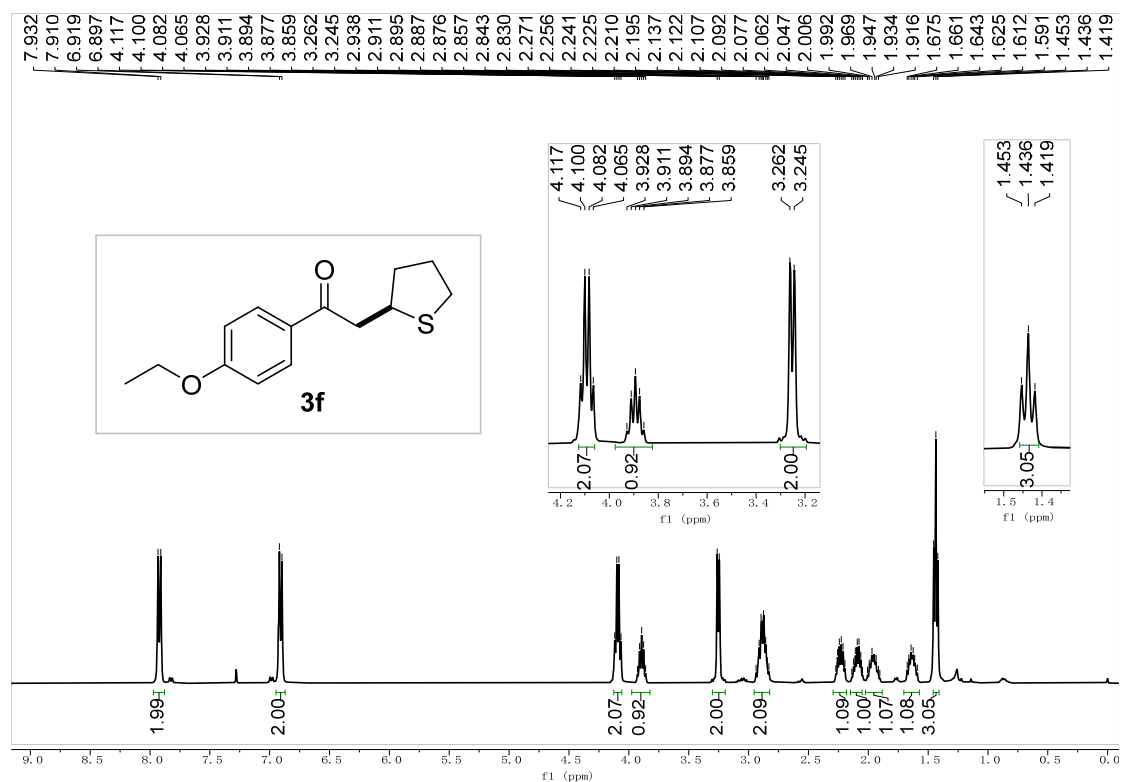

<sup>1</sup>H NMR spectrum of product **3f**

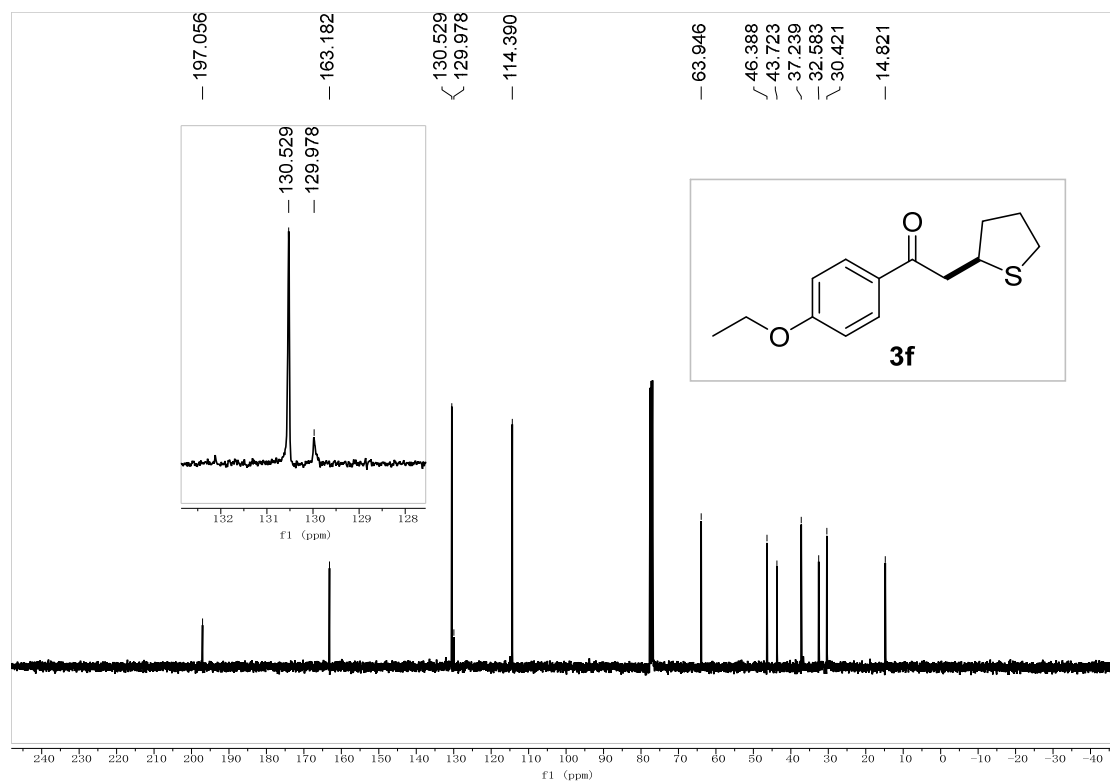

<sup>13</sup>C NMR spectrum of product **3f**

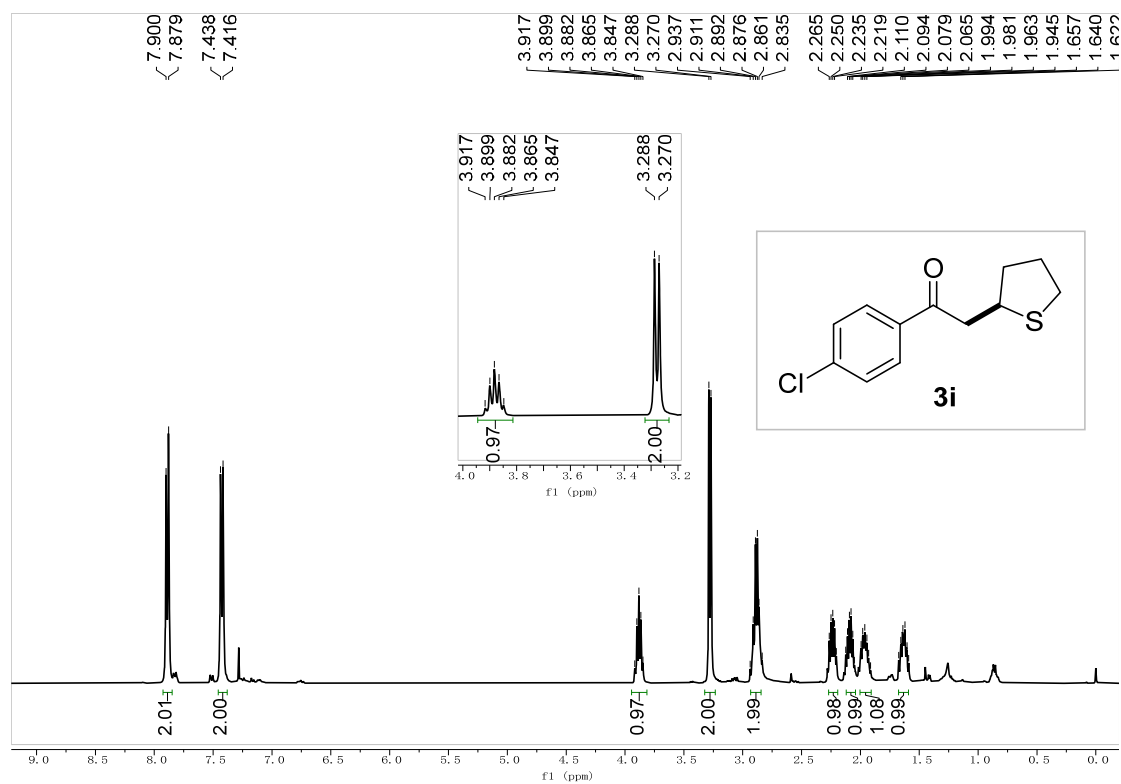

<sup>1</sup>H NMR spectrum of product **3i**

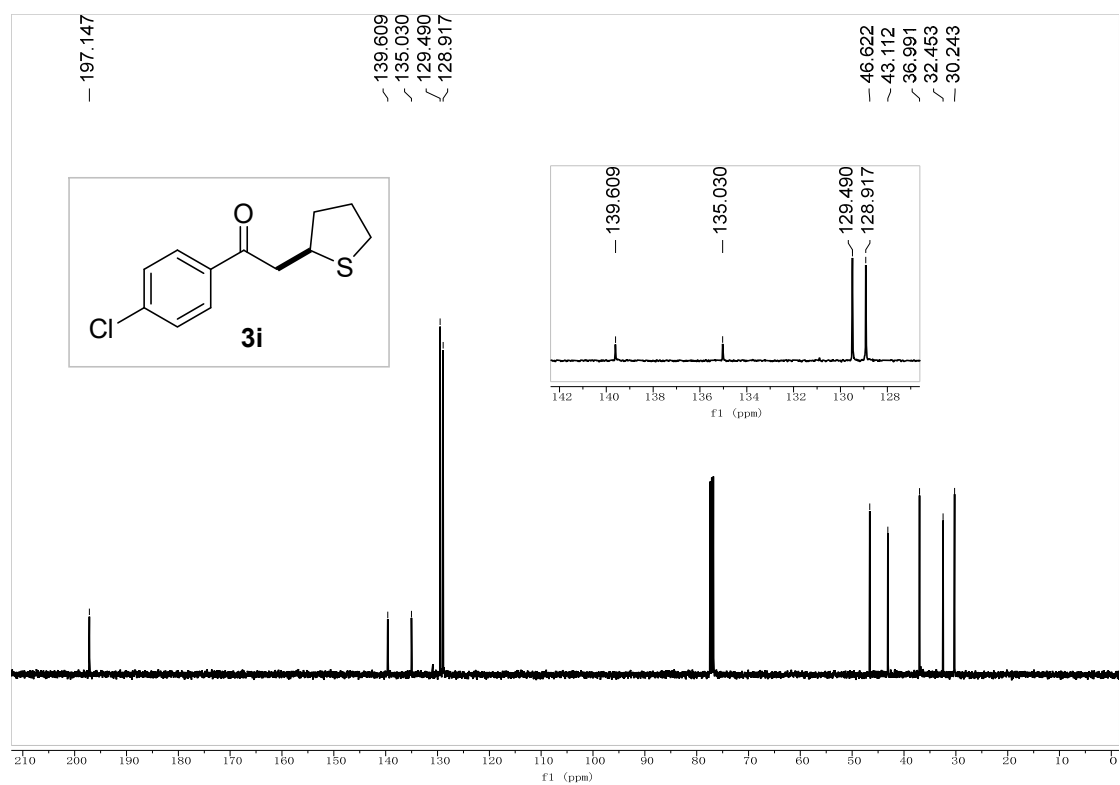

<sup>13</sup>C NMR spectrum of product **3i**

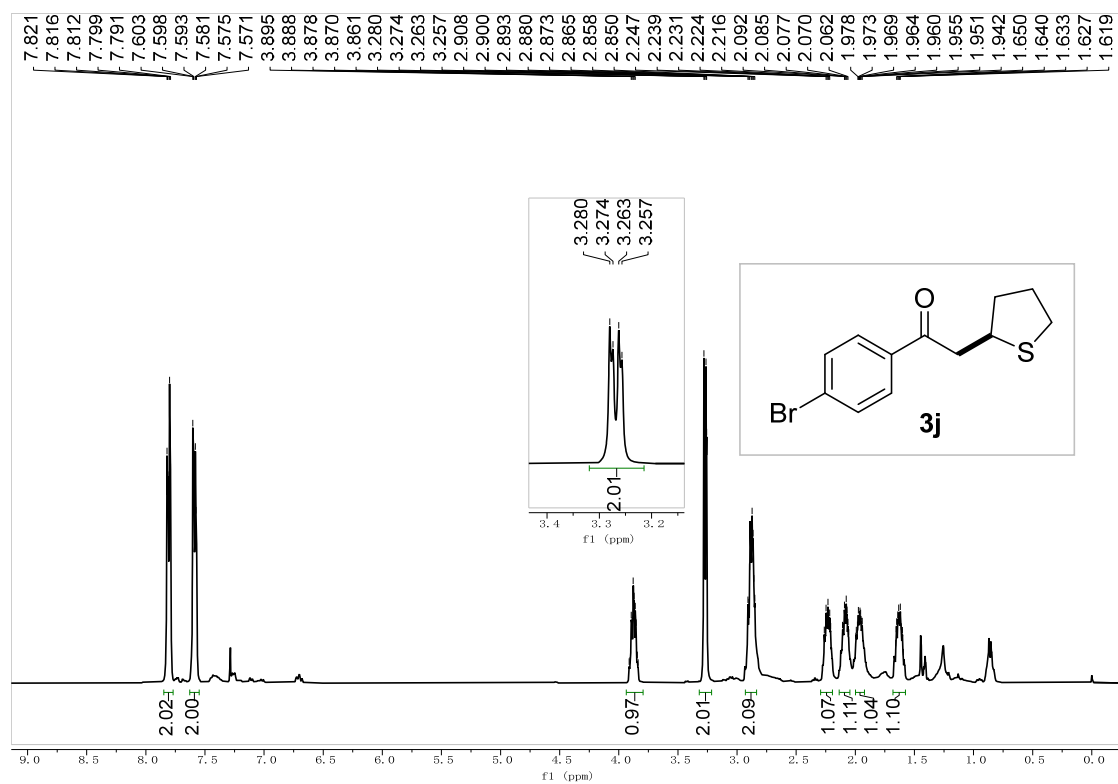

$^1\text{H}$  NMR spectrum of product **3j**

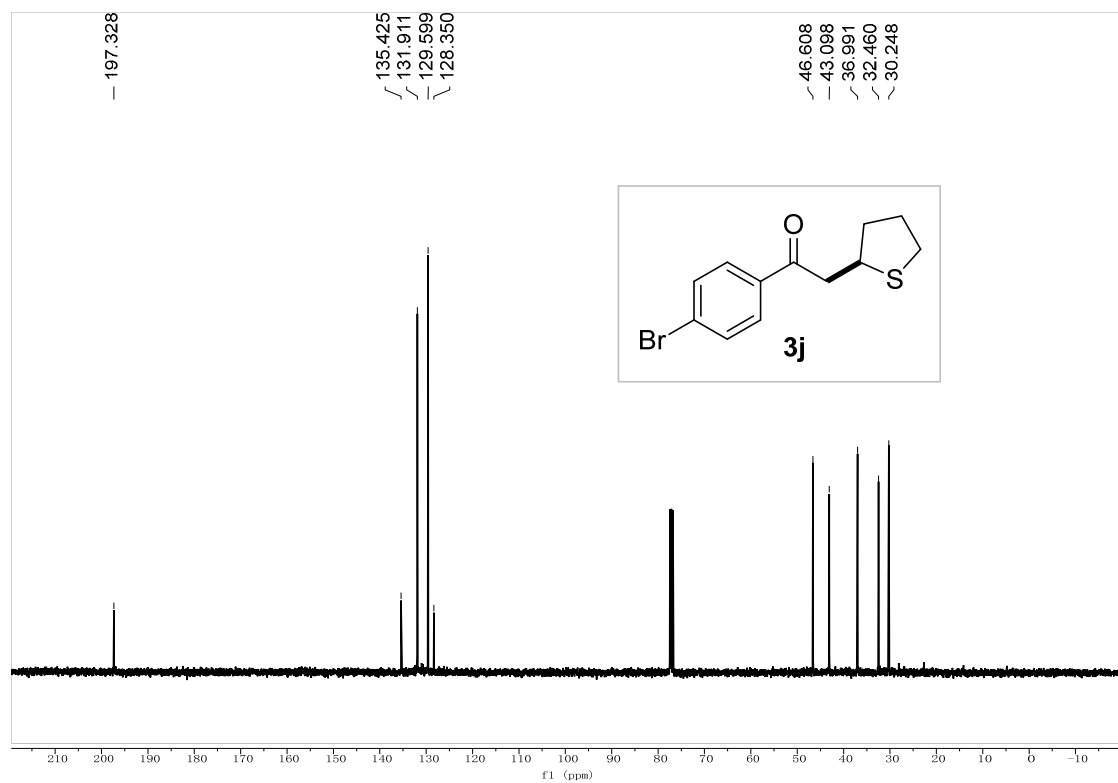

$^{13}\text{C}$  NMR spectrum of product **3j**

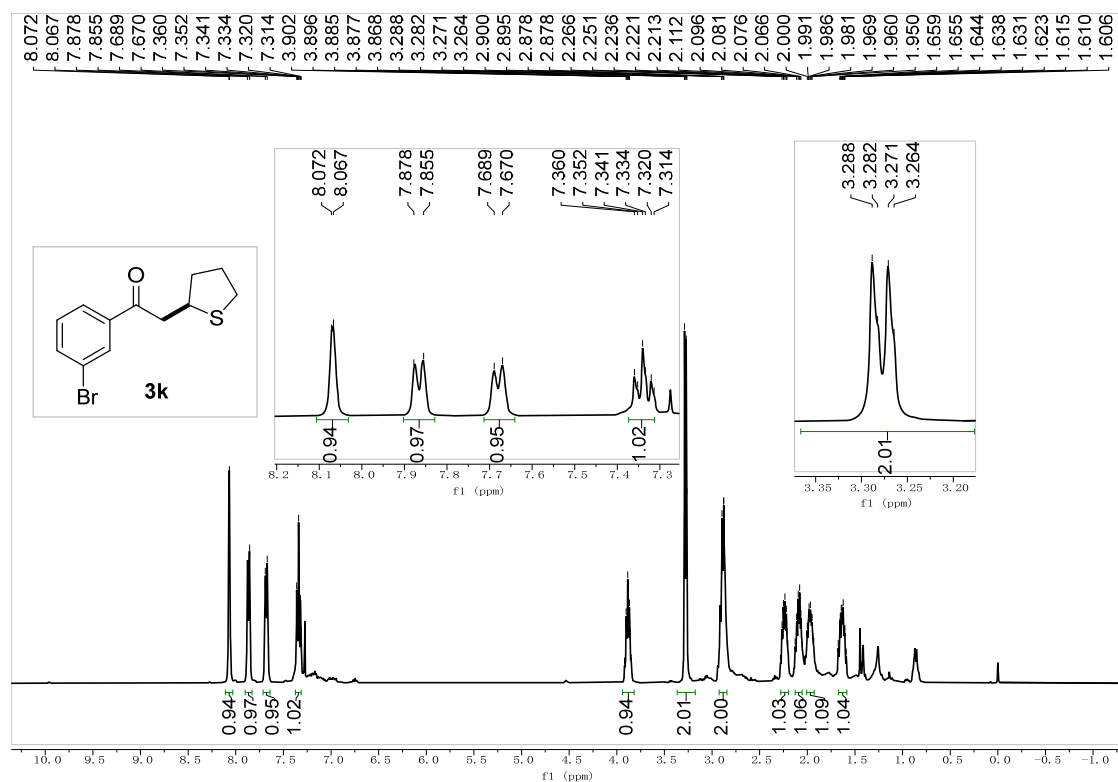

<sup>1</sup>H NMR spectrum of product 3k

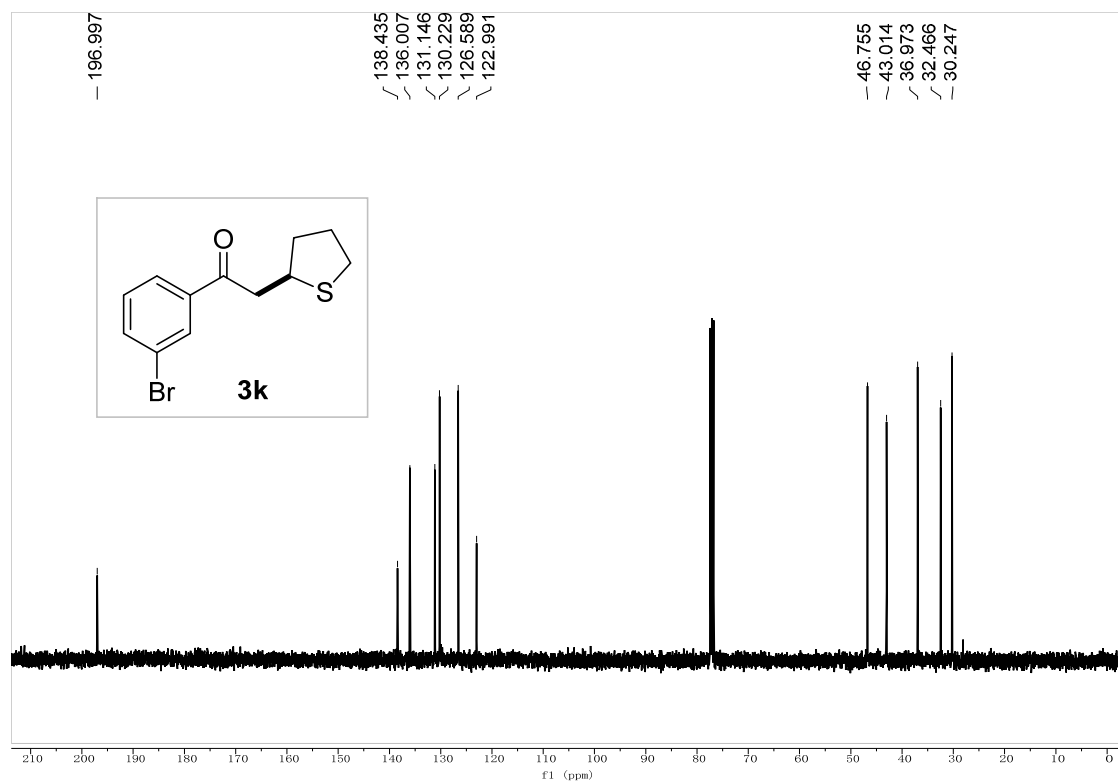

<sup>13</sup>C NMR spectrum of product 3k

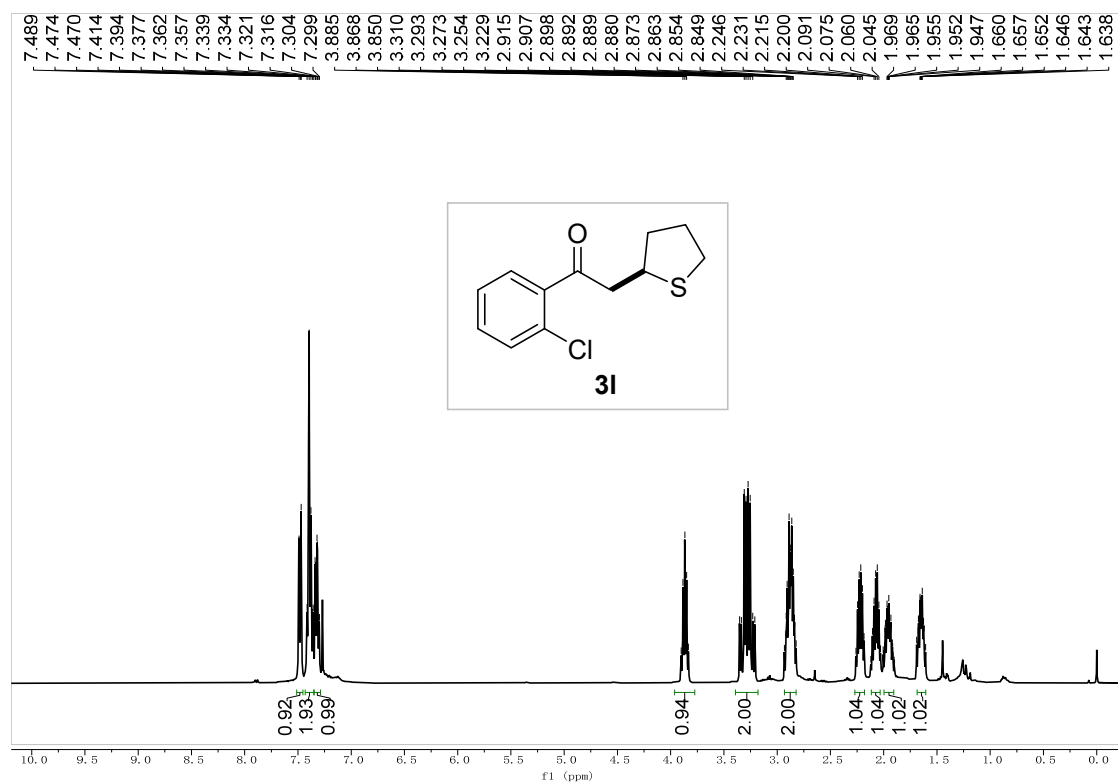

$^1\text{H}$  NMR spectrum of product **3I**

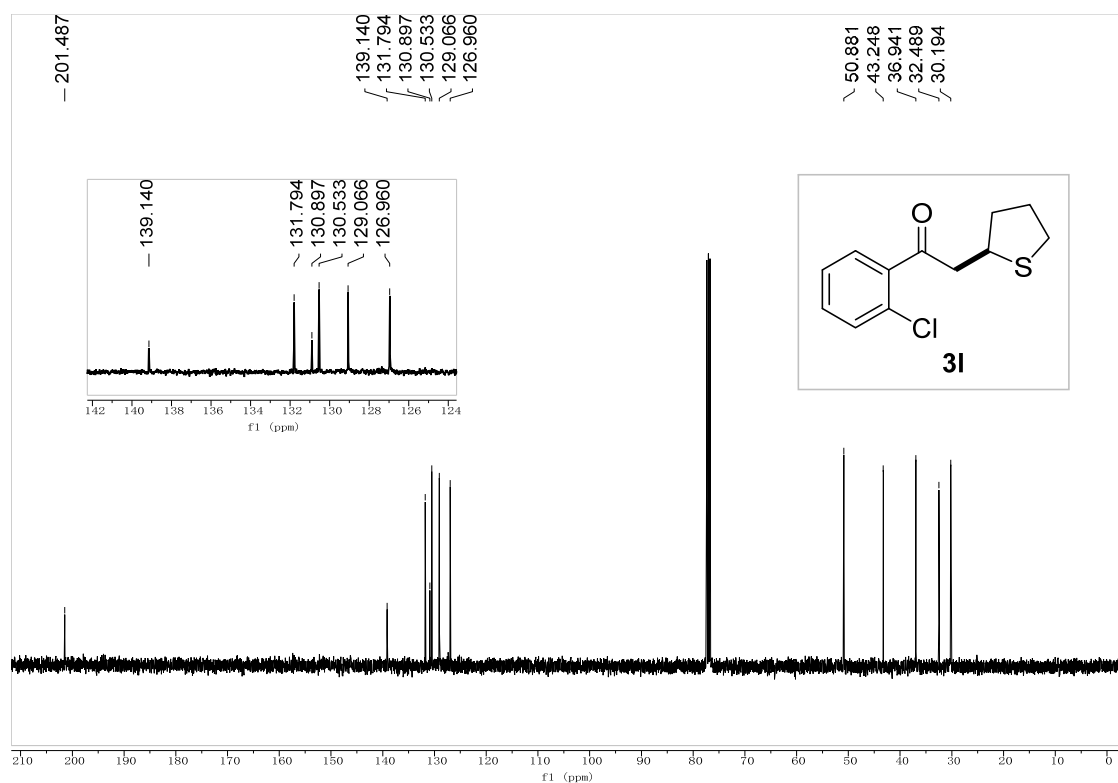

$^{13}\text{C}$  NMR spectrum of product **3I**

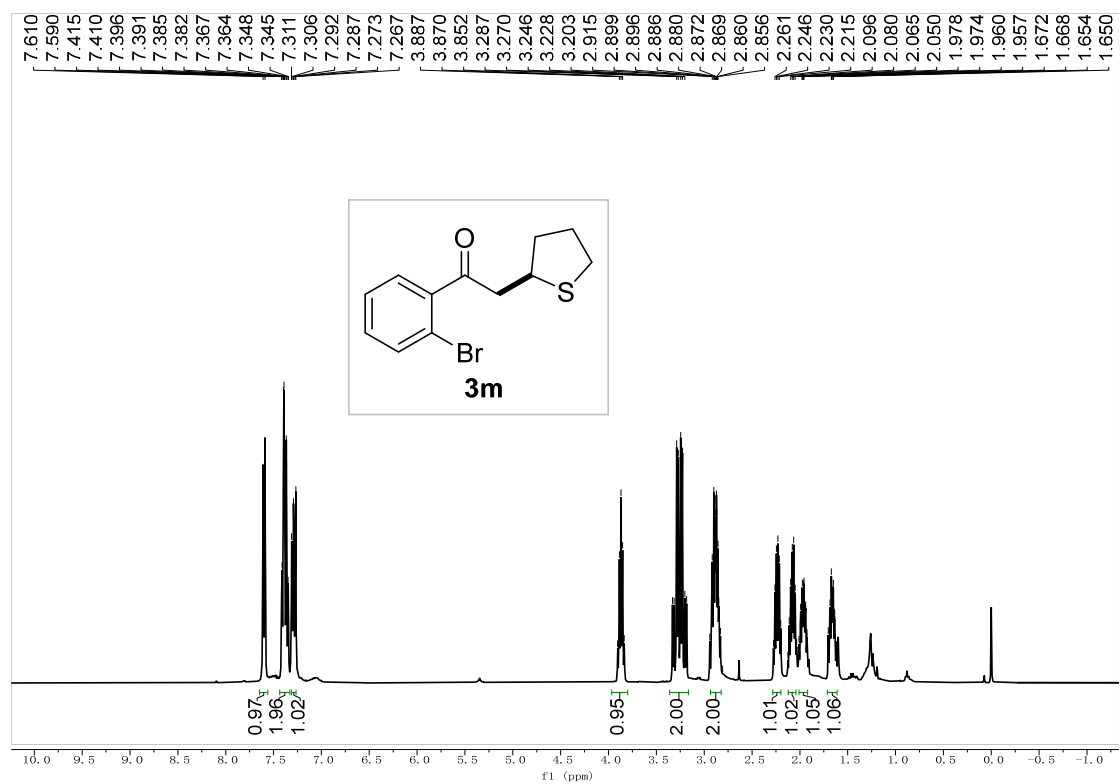

<sup>1</sup>H NMR spectrum of product **3m**

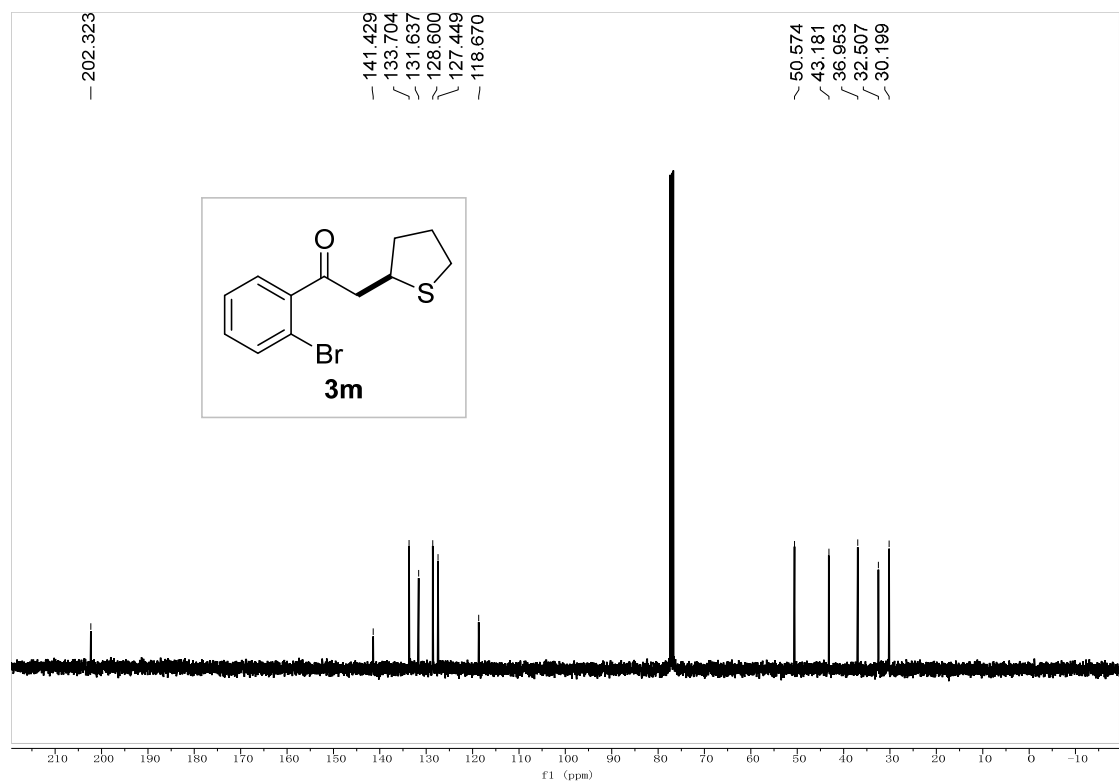

<sup>13</sup>C NMR spectrum of product **3m**

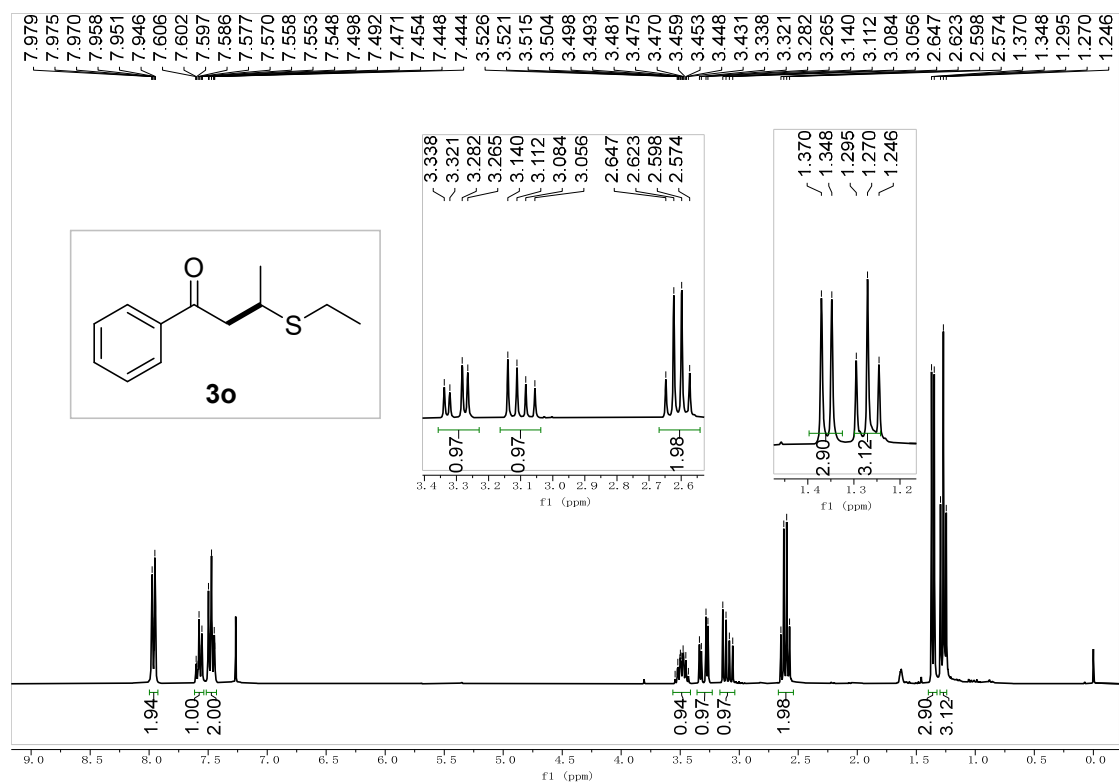

<sup>1</sup>H NMR spectrum of product 30

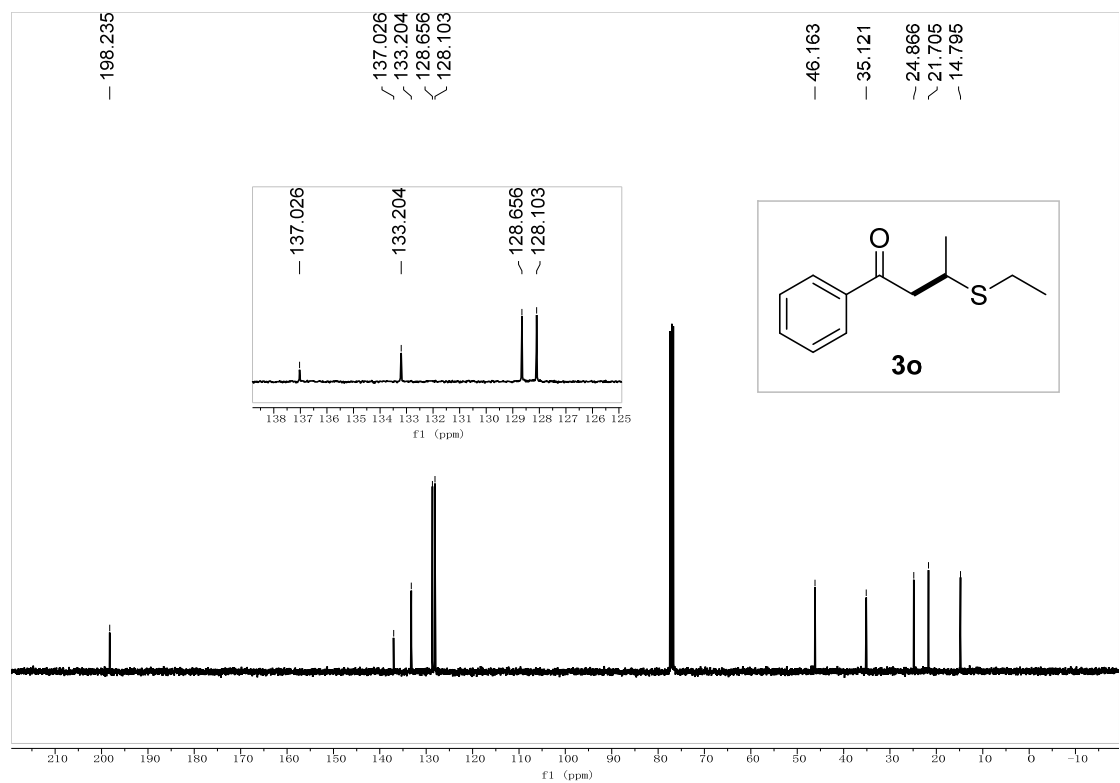

<sup>13</sup>C NMR spectrum of product 30



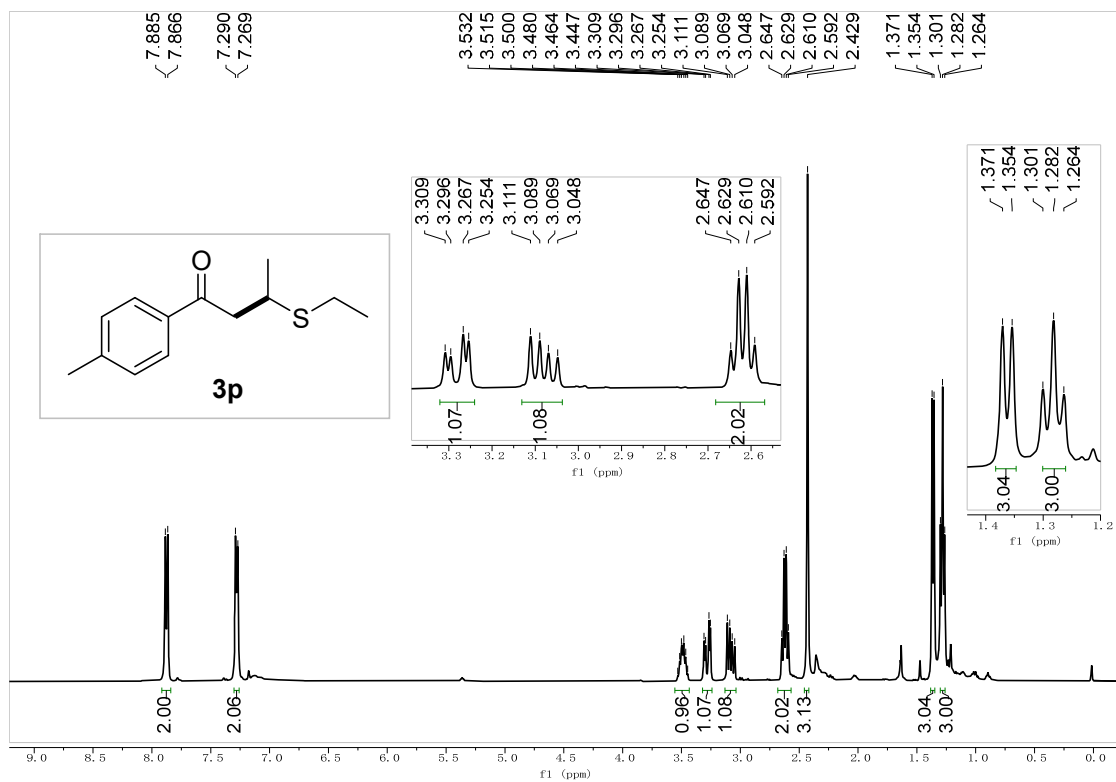

<sup>1</sup>H NMR spectrum of product **3p**

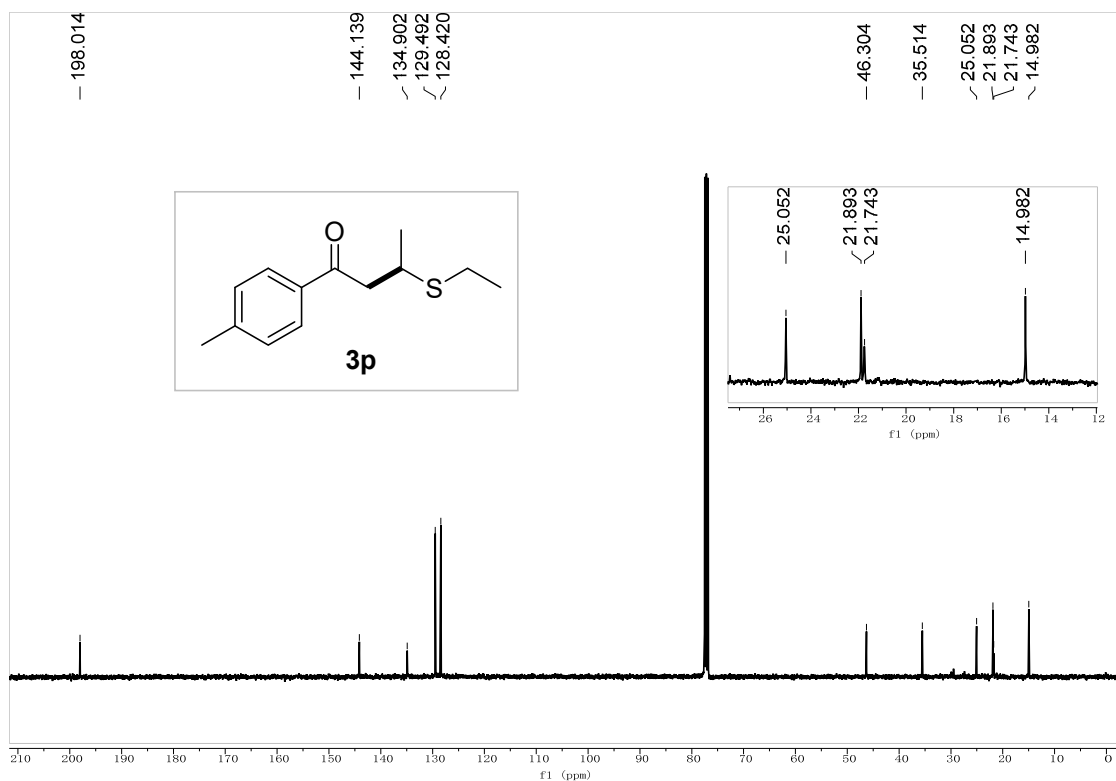

<sup>13</sup>C NMR spectrum of product **3p**

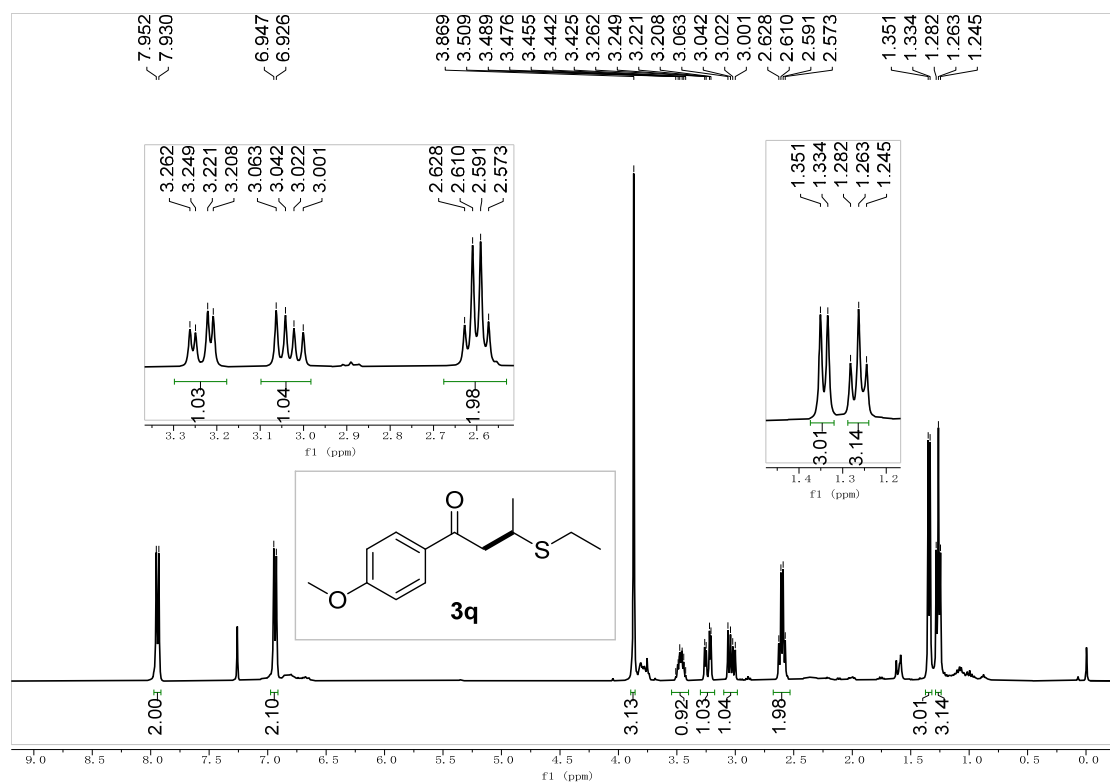

**<sup>1</sup>H NMR spectrum of product 3q**

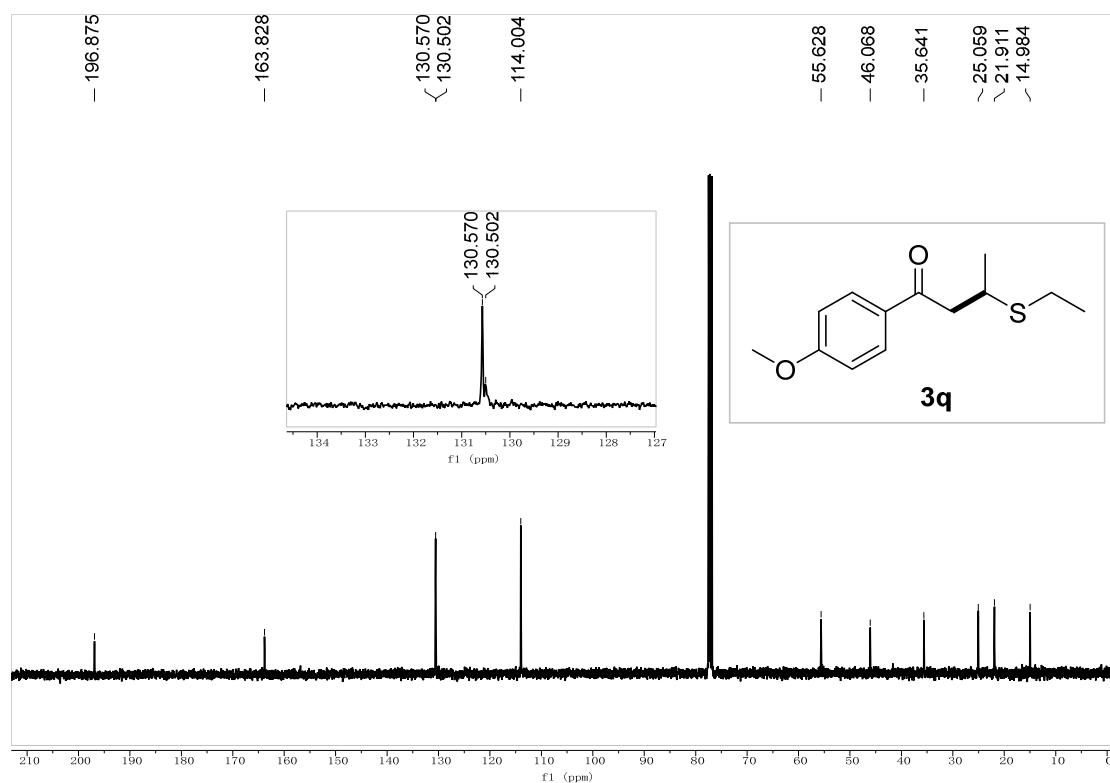

**<sup>13</sup>C NMR spectrum of product 3q**

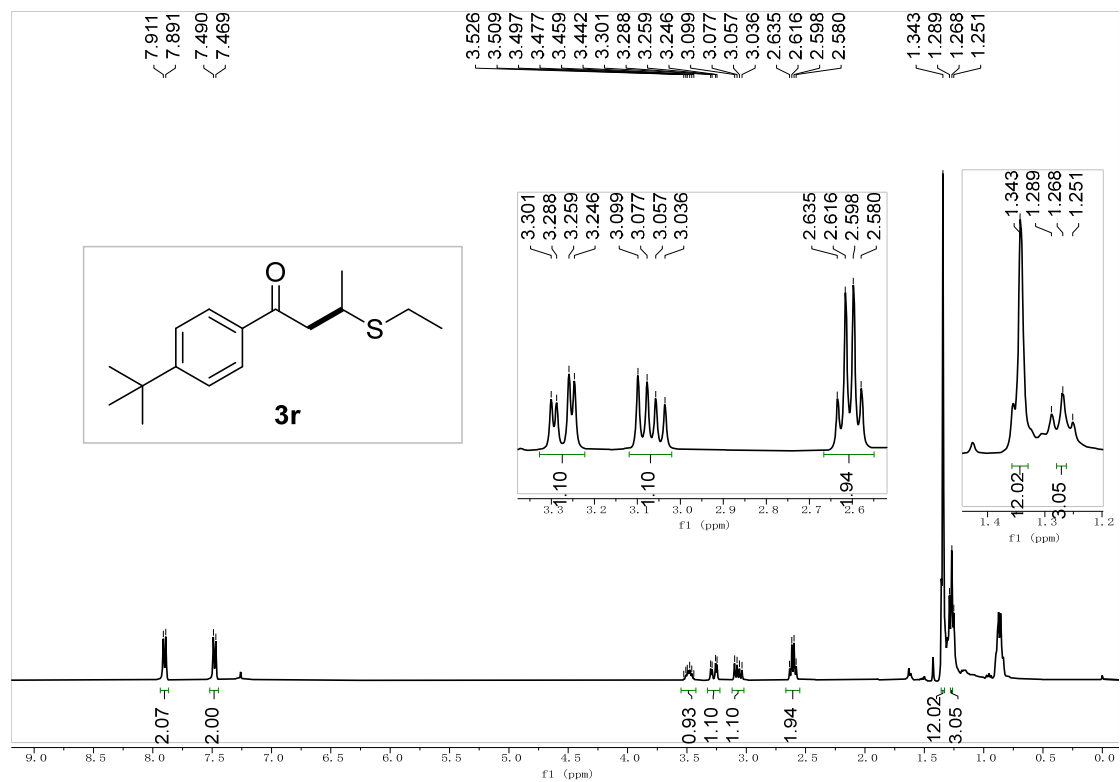

<sup>1</sup>H NMR spectrum of product **3r**

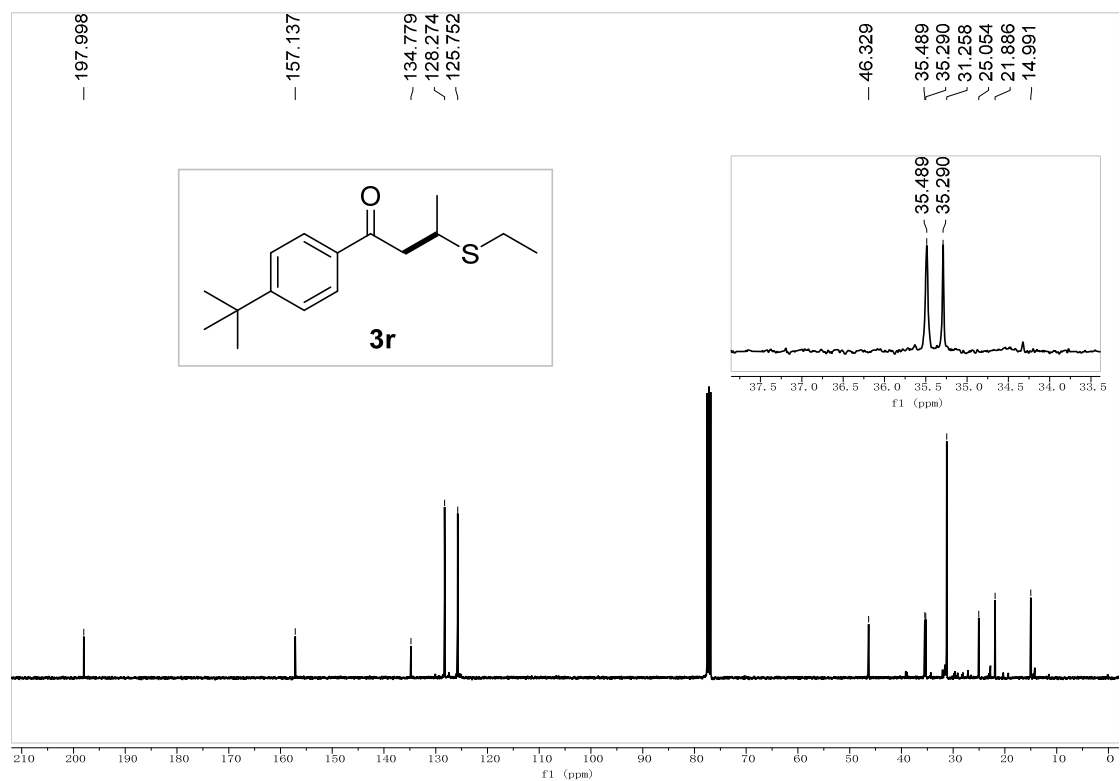

<sup>13</sup>C NMR spectrum of product **3r**

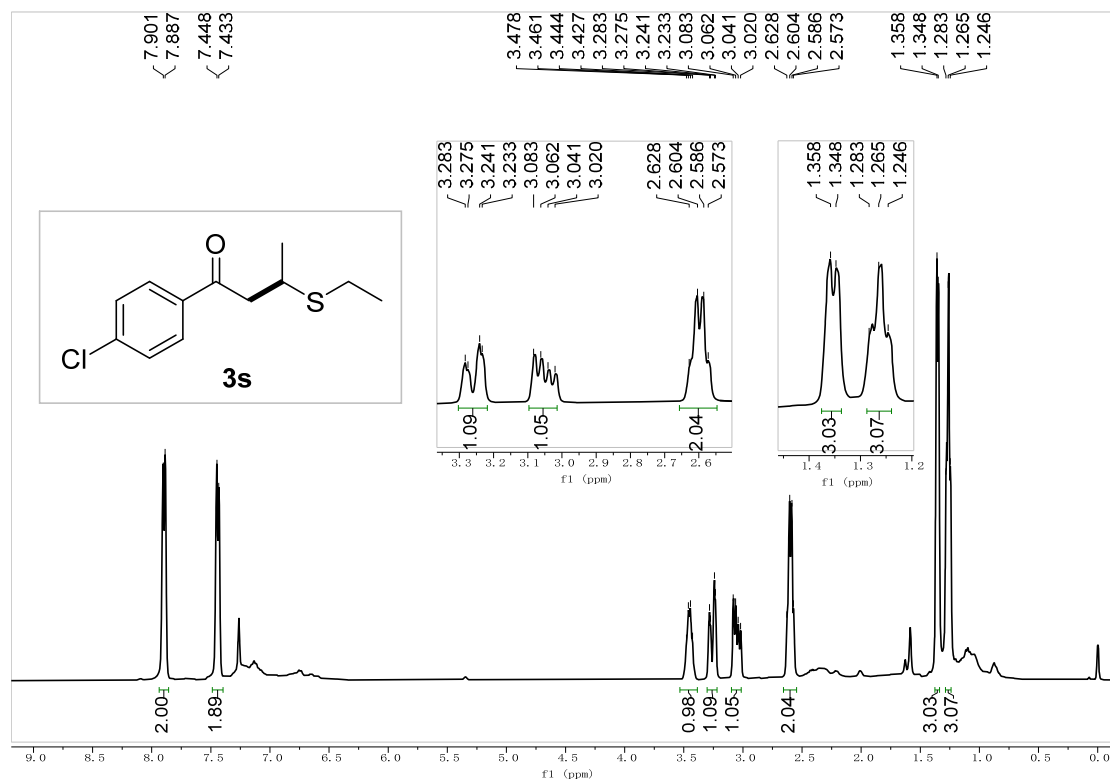

<sup>1</sup>H NMR spectrum of product 3s

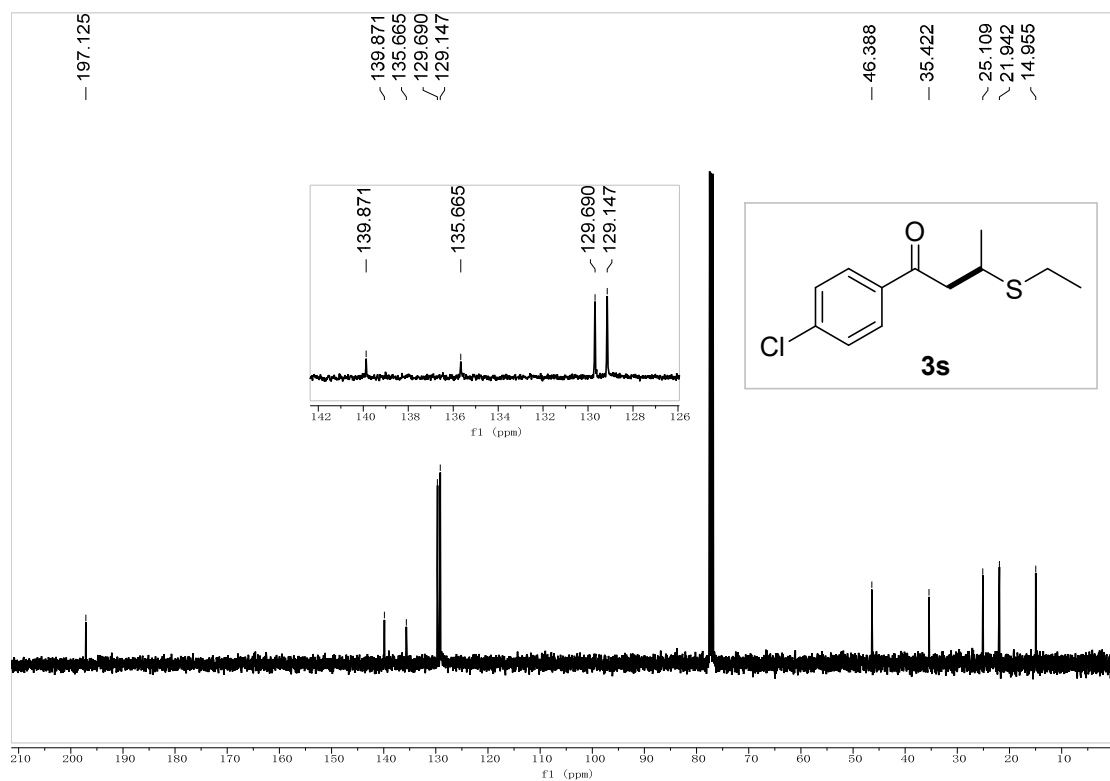

<sup>13</sup>C NMR spectrum of product 3s

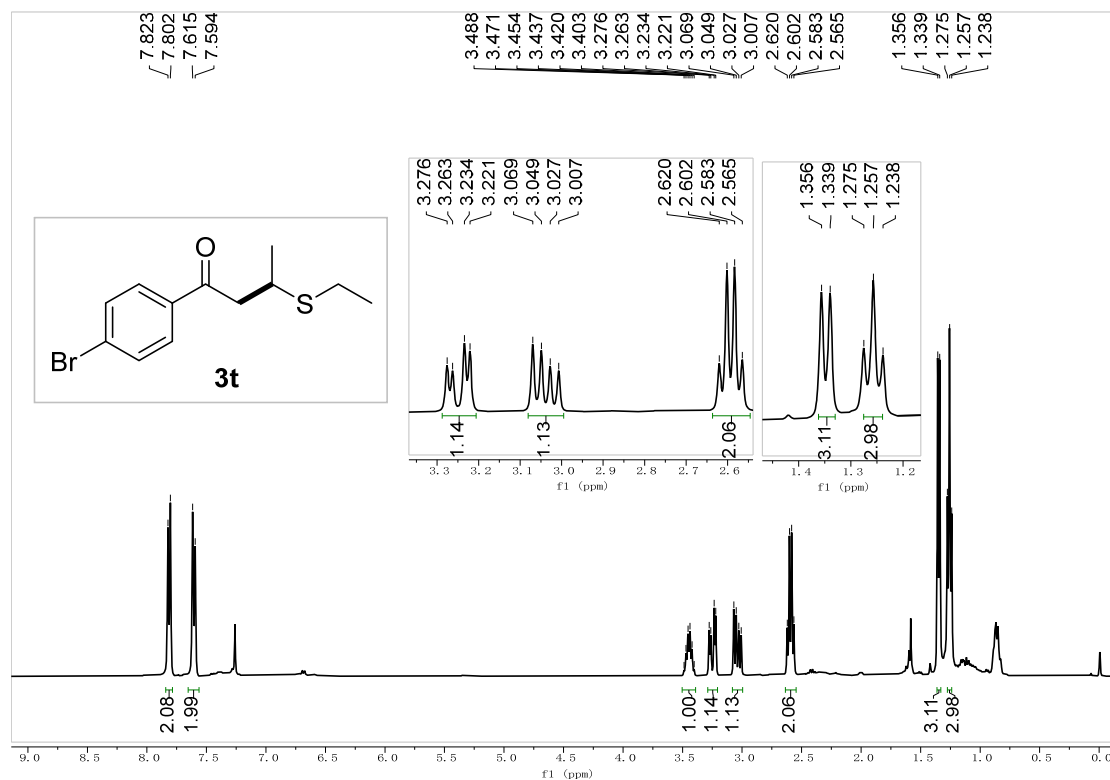

<sup>1</sup>H NMR spectrum of product **3t**

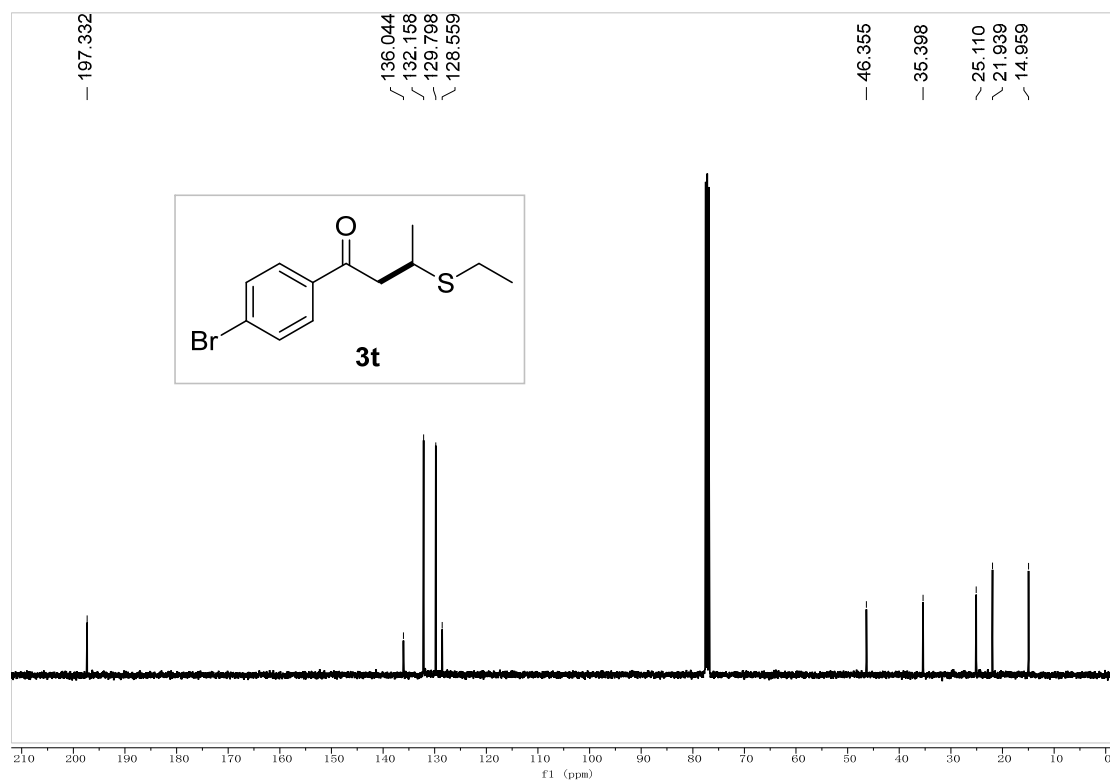

<sup>13</sup>C NMR spectrum of product **3t**

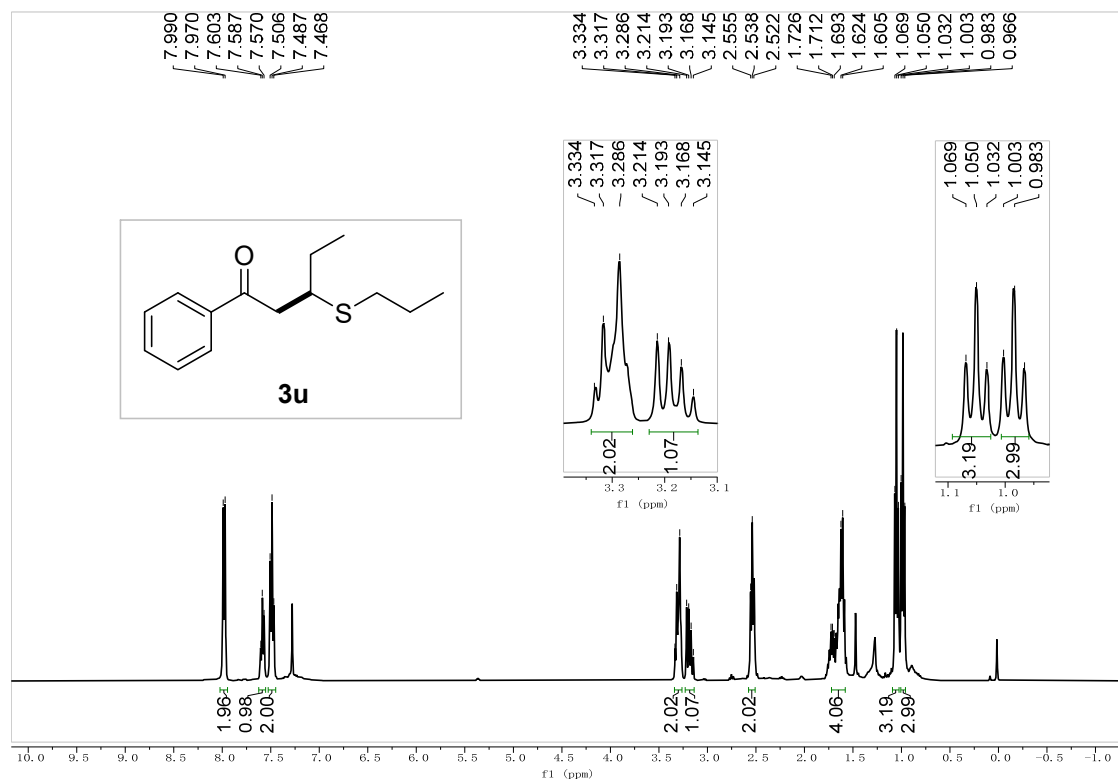

<sup>1</sup>H NMR spectrum of product **3u**

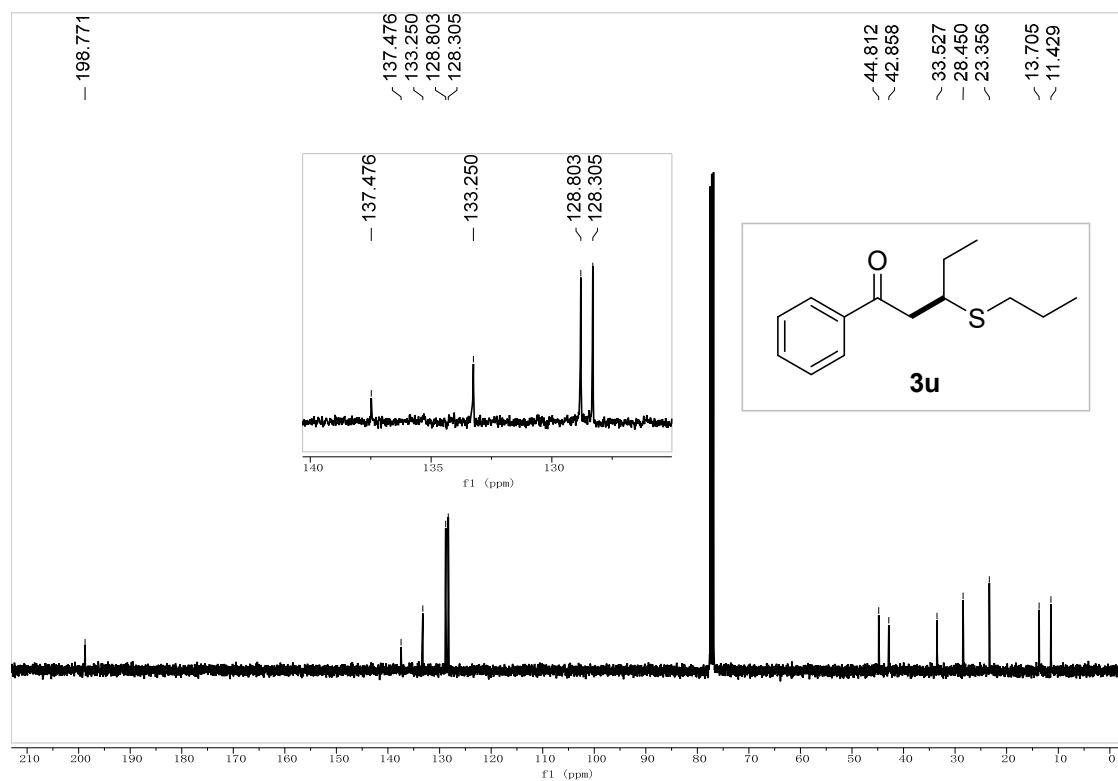

<sup>13</sup>C NMR spectrum of product **3u**

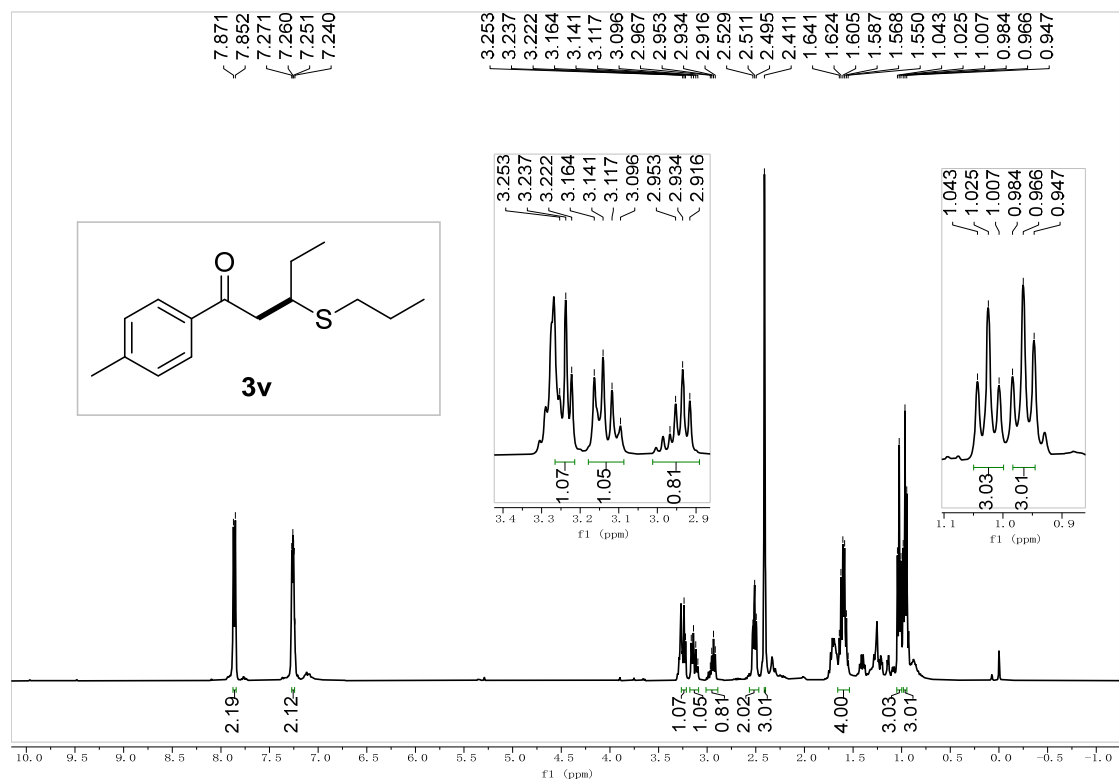

<sup>1</sup>H NMR spectrum of product 3v

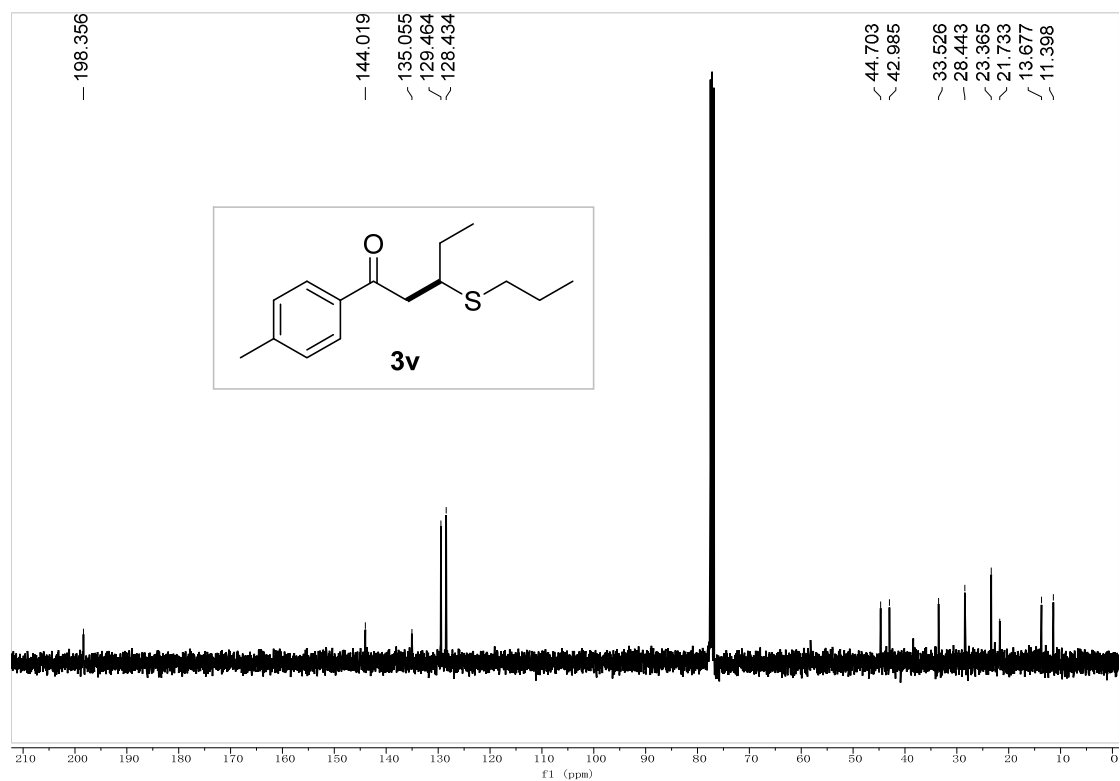

<sup>13</sup>C NMR spectrum of product 3v

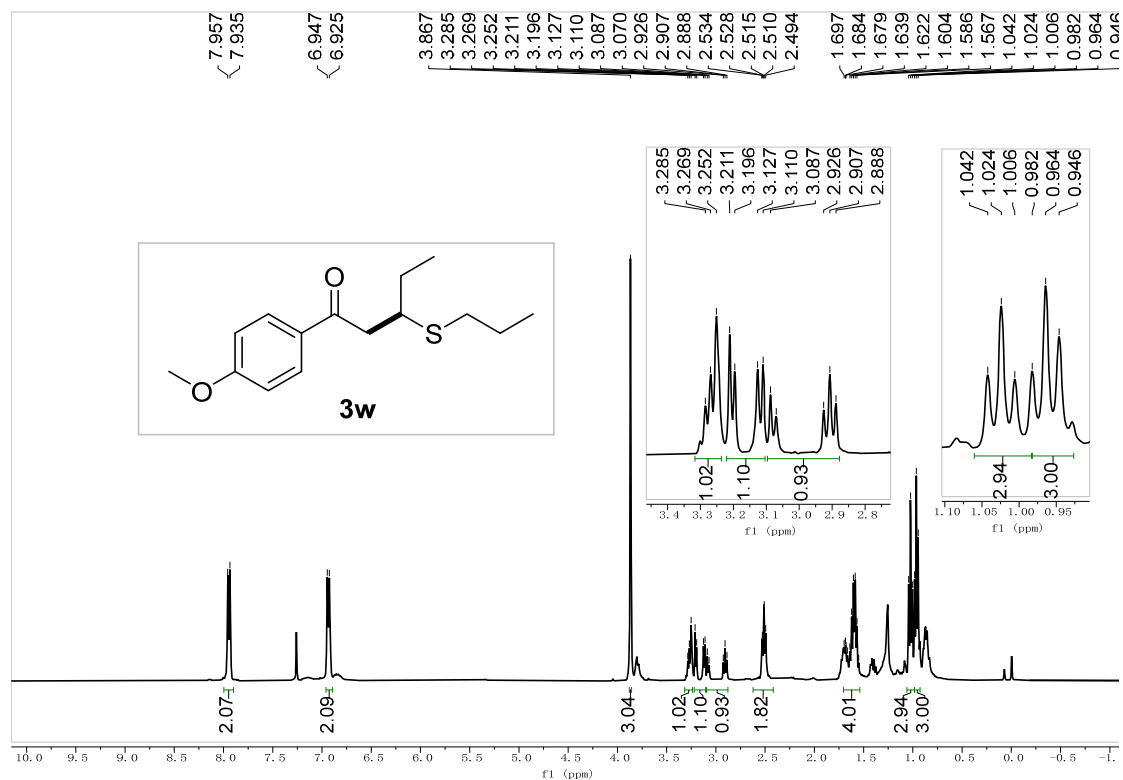

<sup>1</sup>H NMR spectrum of product **3w**

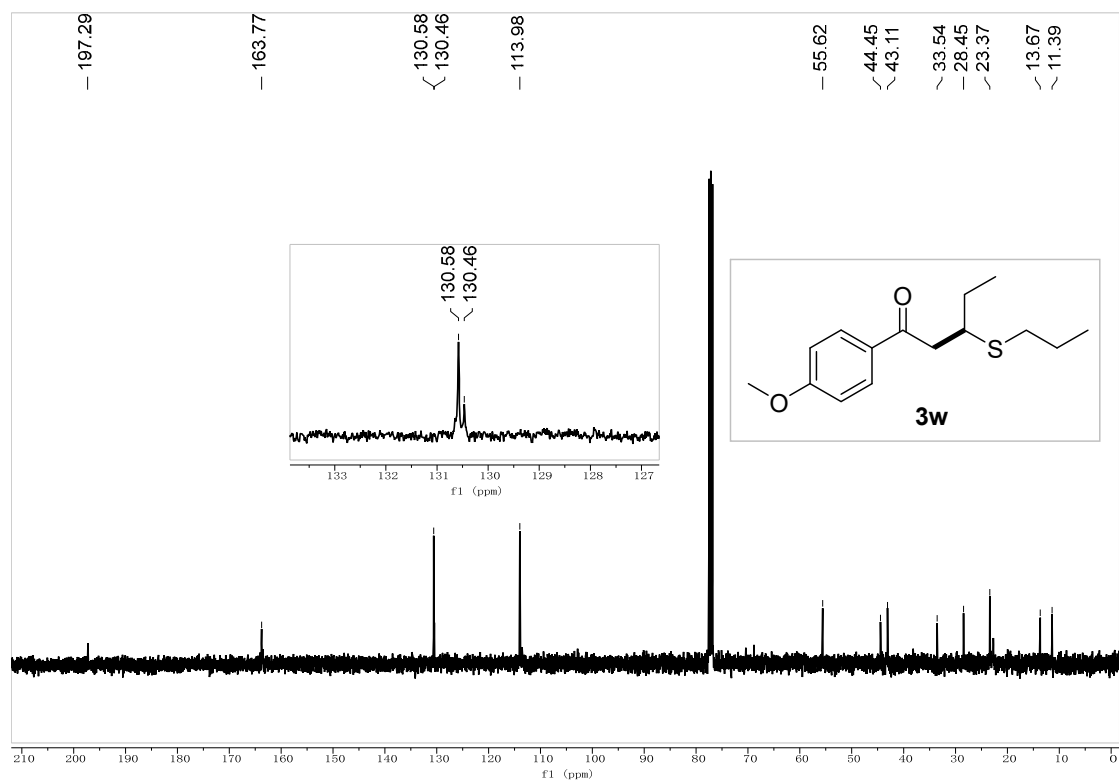

<sup>13</sup>C NMR spectrum of product **3w**



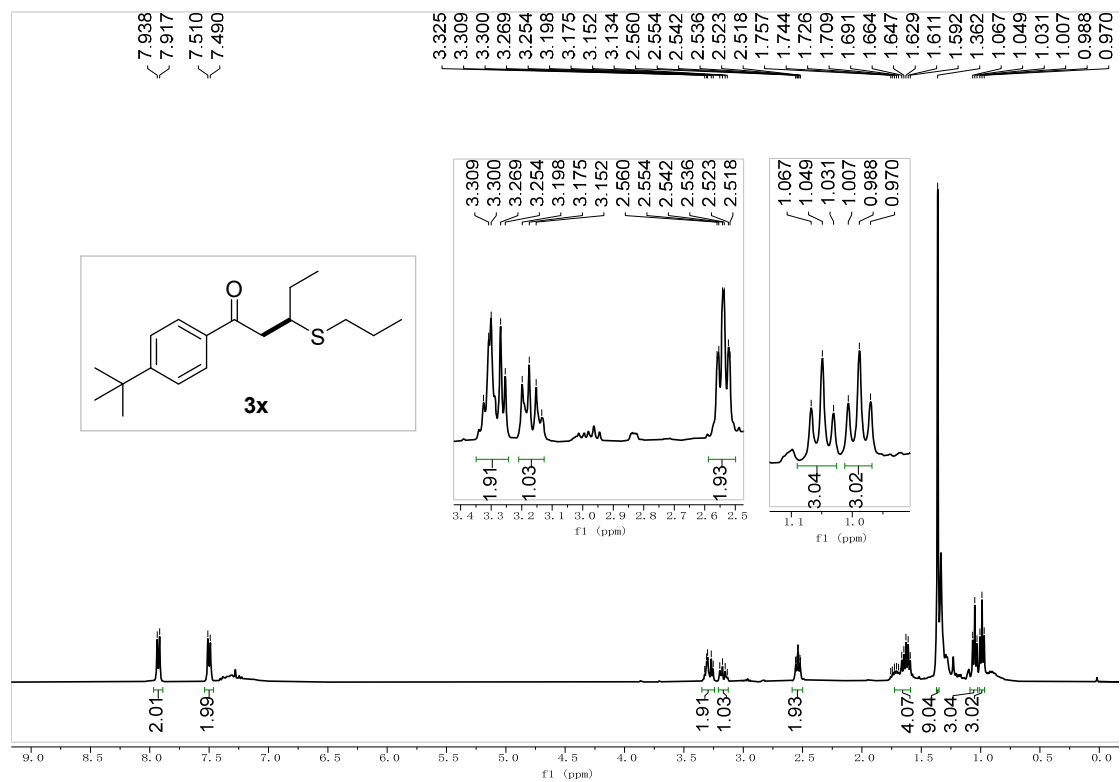

<sup>1</sup>H NMR spectrum of product **3x**

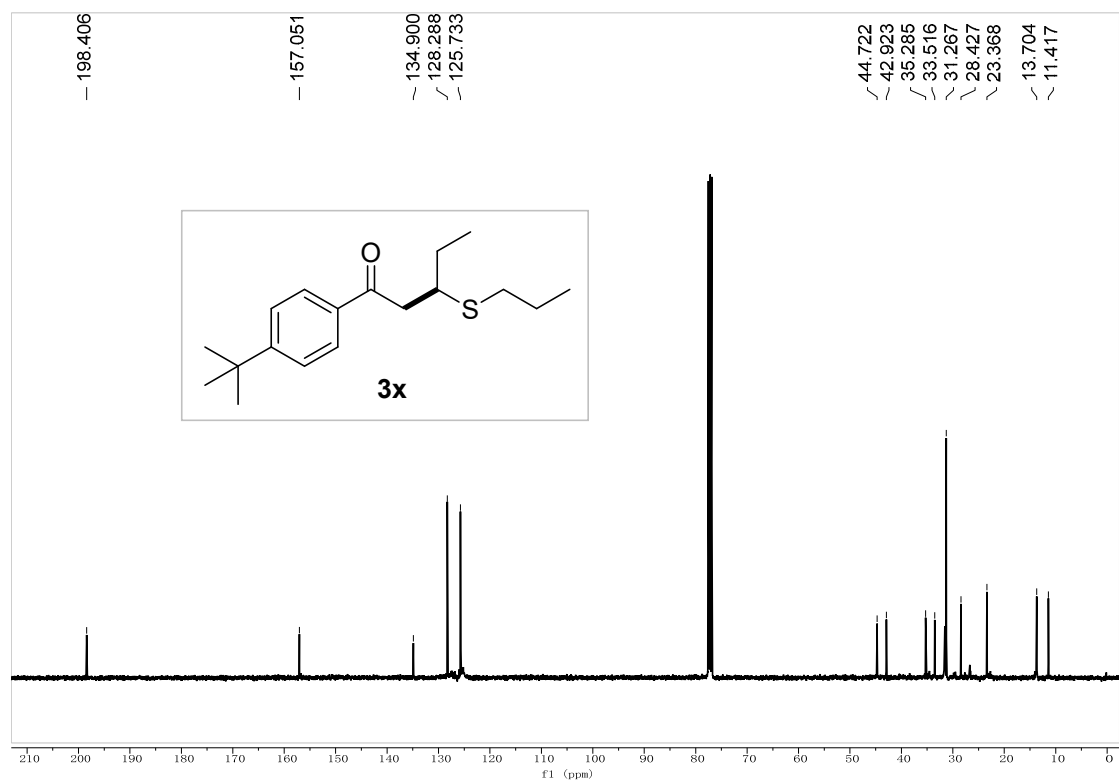

<sup>13</sup>C NMR spectrum of product **3x**

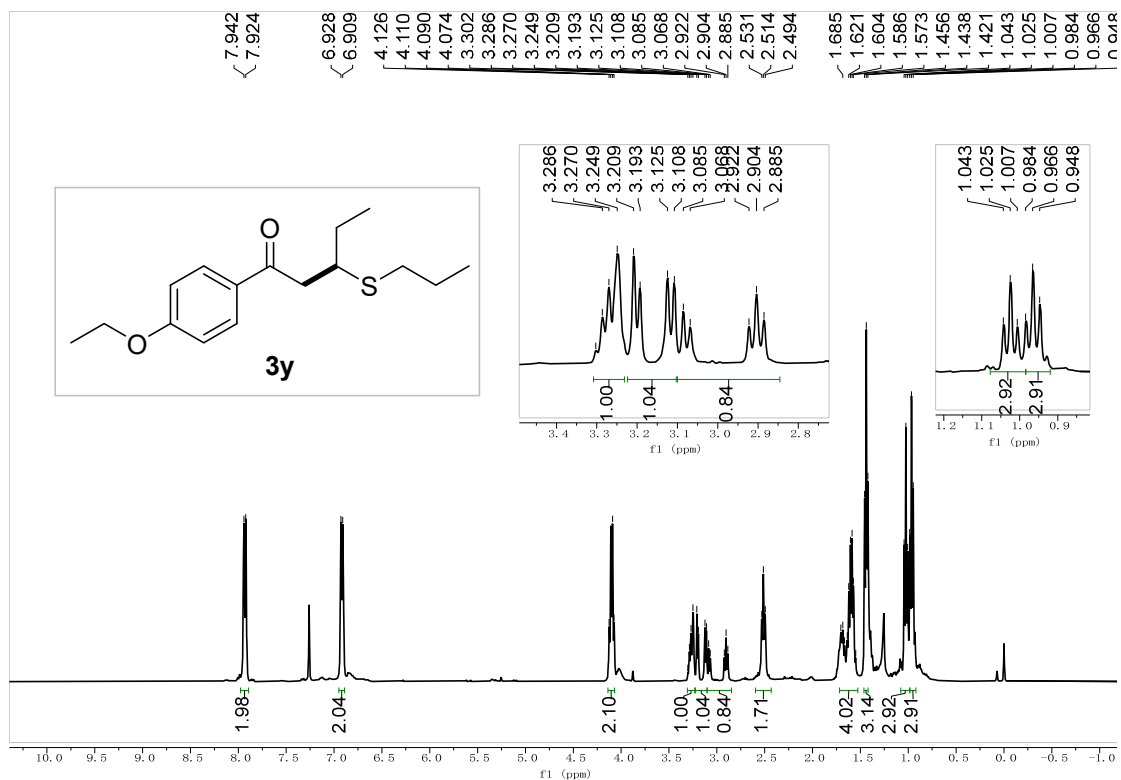

<sup>1</sup>H NMR spectrum of product **3y**

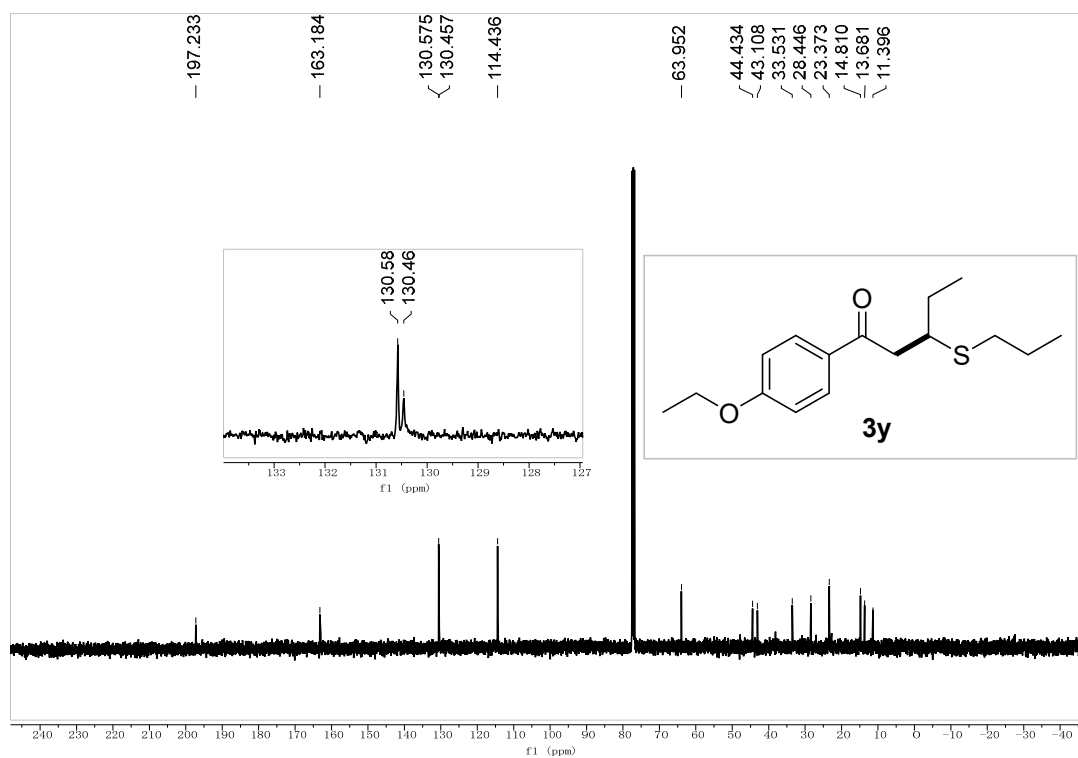

<sup>13</sup>C NMR spectrum of product **3y**

## 7. Copies of HRMS Spectra of All Products

Yarchan-1 #9 RT: 0.09 AV: 1 NL: 8.10E8  
T: FTMS+pESI Full lock: ms [50.0000-750.0000]

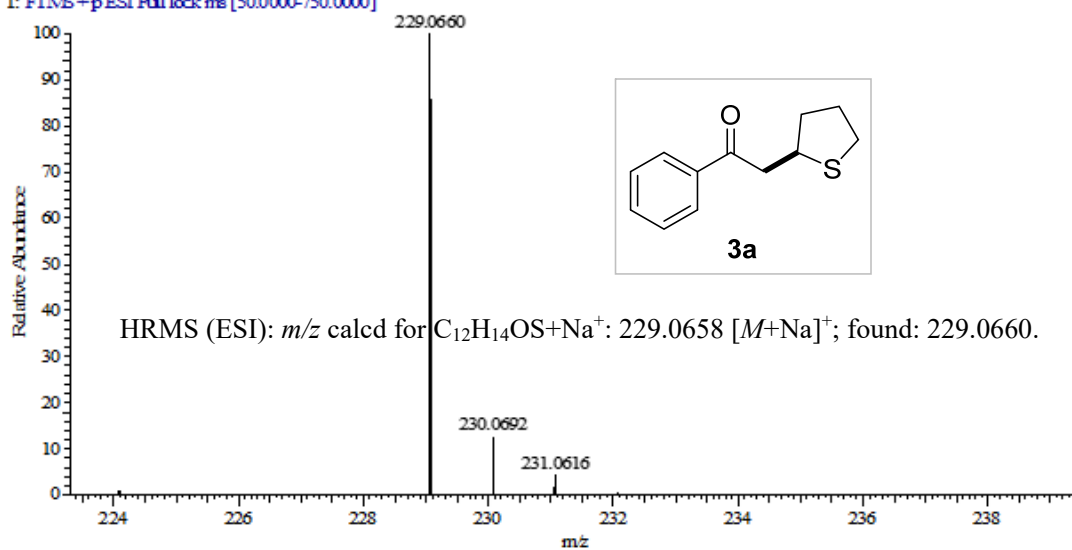

HRMS spectrum of product **3a**

Yarchan-1 #9 RT: 0.09 AV: 1 NL: 5.36E8  
T: FTMS+pESI Full lock: ms [50.0000-750.0000]

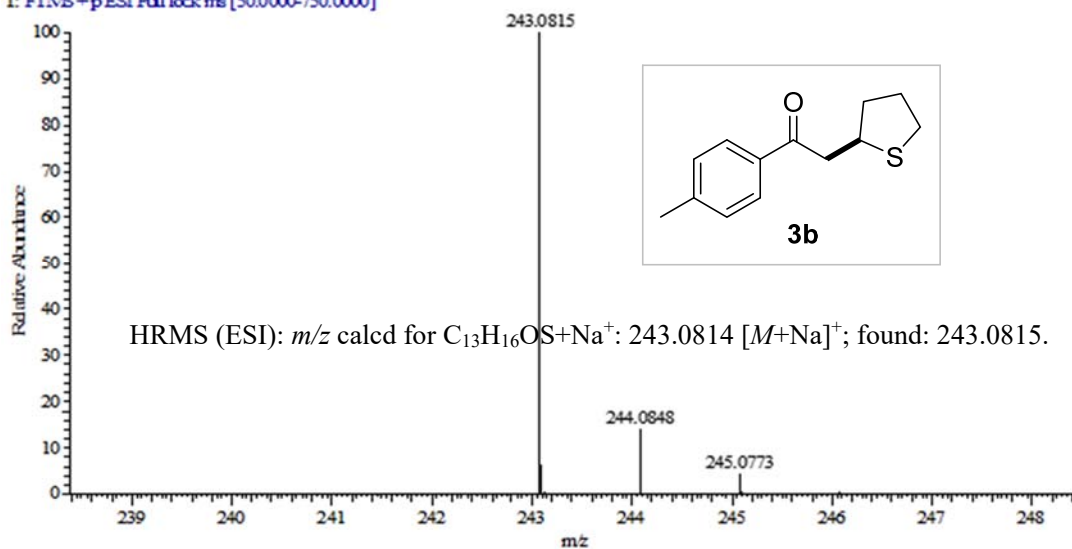

HRMS spectrum of product **3b**

20210409\_004 #1941 RT: 7.62 AV: 1 SB: 2 3.00, 3.00 NL: 5.37E7  
T: FTMS + p EI Full ms [50.0000-750.0000]

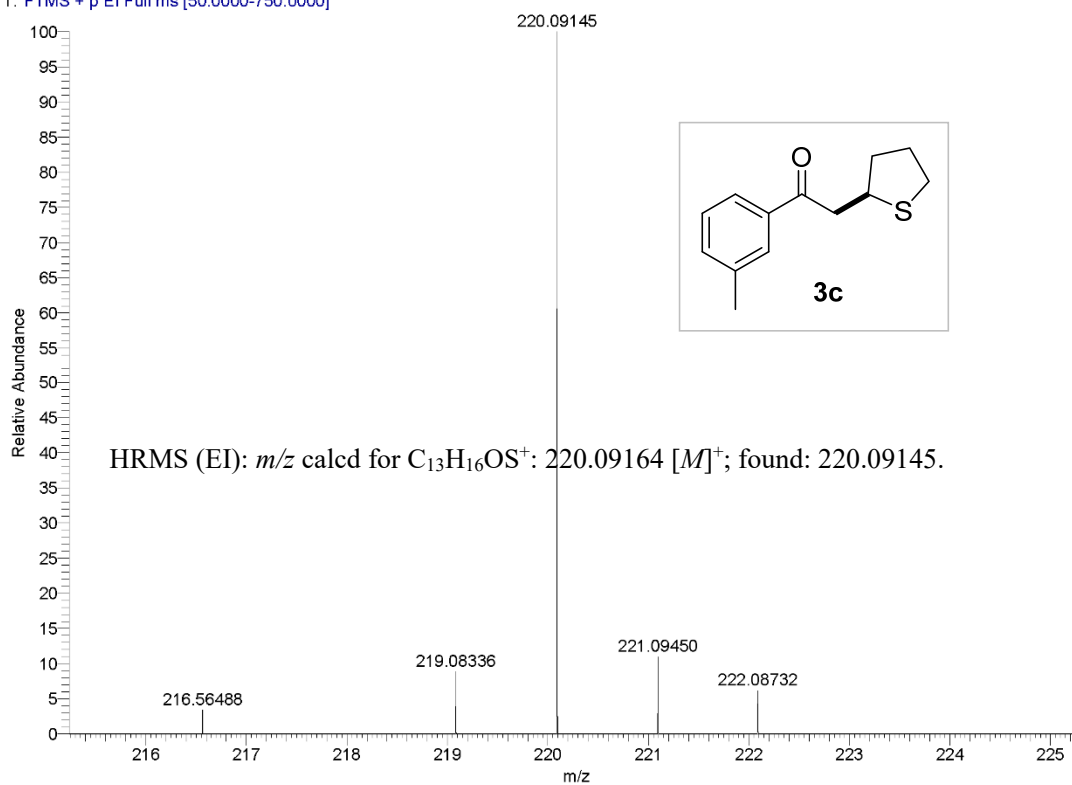

HRMS spectrum of product **3c**

Yarchan-#9 RT: 0.09 AV: 1 NL: 3.69E8  
T: FTMS + p ESI Full lock ms [50.0000-750.0000]

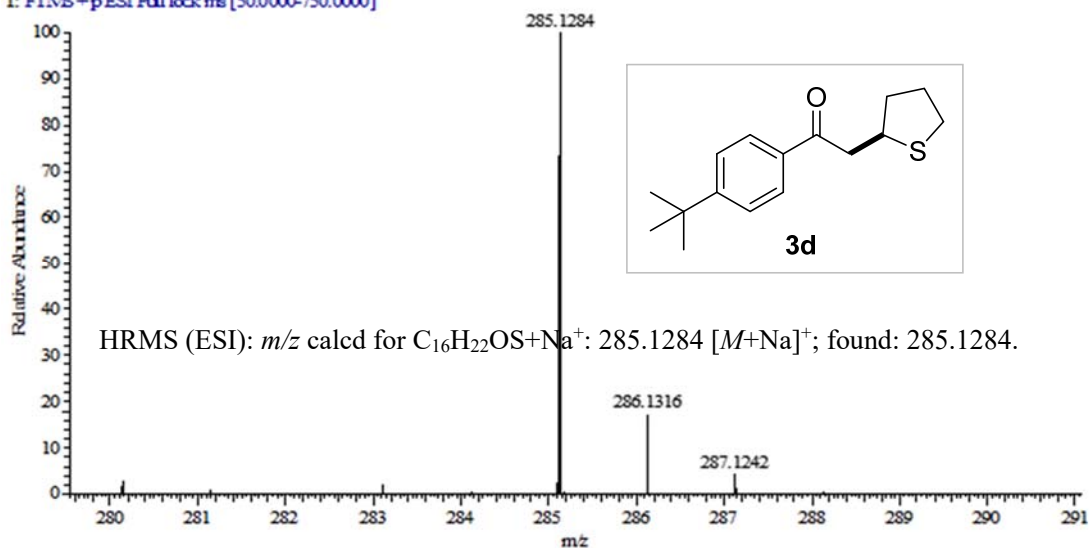

HRMS spectrum of product **3d**

Yarchan-4 #9 RT: 0.09 AV: 1 NL: 1.04E9  
T: FTMS → p ESI Full lock: ms [50.0000-750.0000]

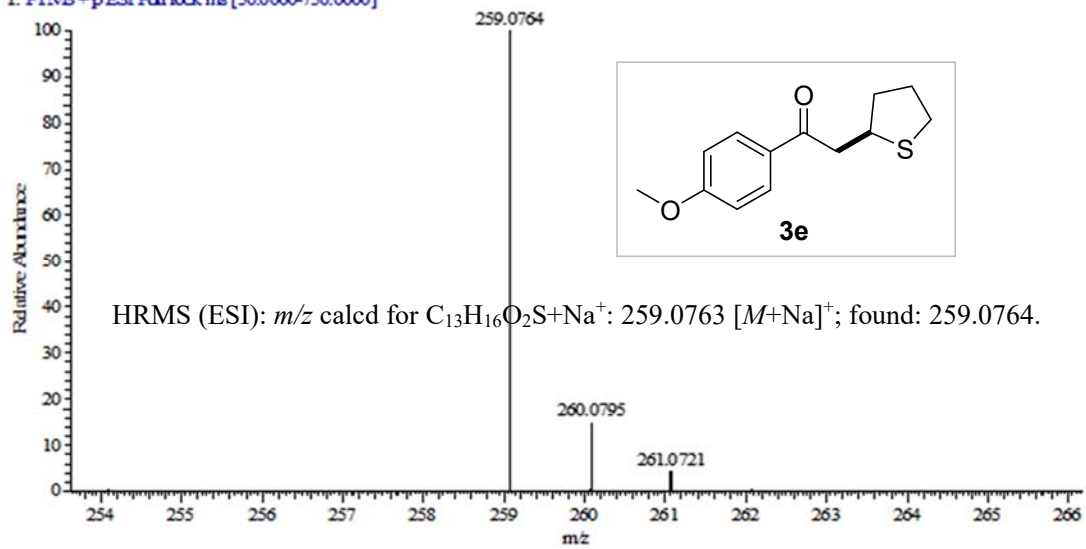

HRMS spectrum of product **3e**

D:\Test\20210518\_002

05/18/21 15:30:21

20210518\_002 #2326-2327 RT: 8.40-8.40 AV: 2 SB: 2 3.00, 3.00 NL: 1.57E8  
T: FTMS + p EI Full ms [50.0000-750.0000]

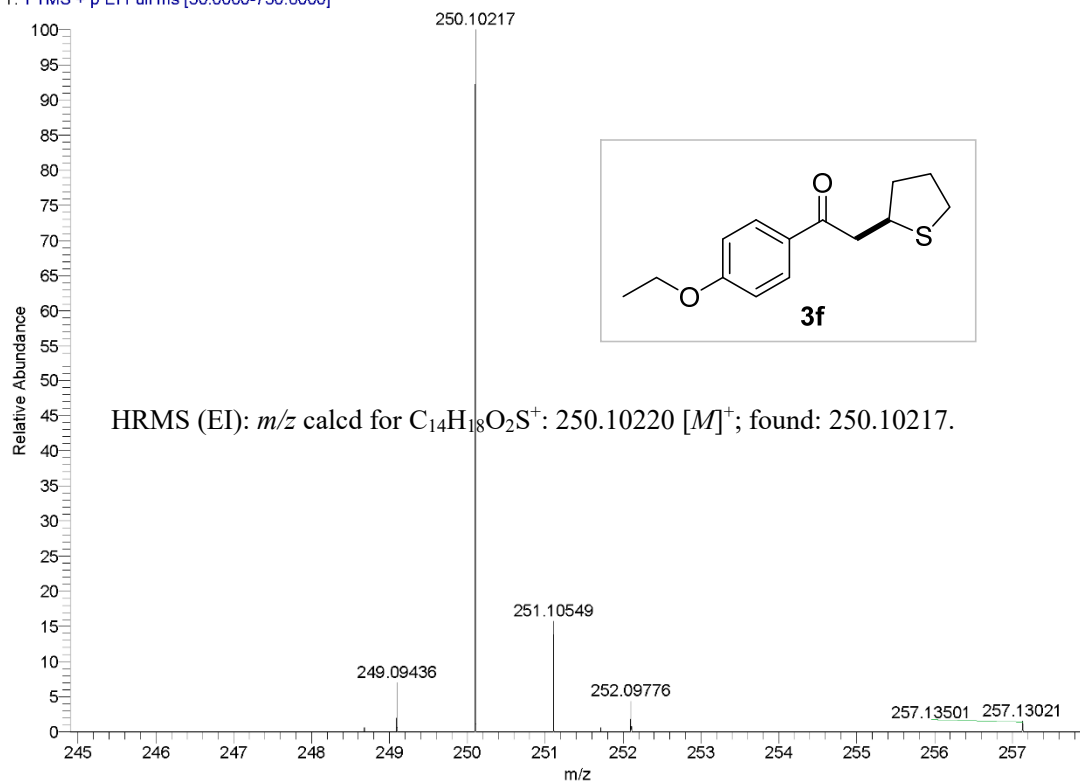

HRMS spectrum of product **3f**

20210409\_003 #2044 RT: 7.88 AV: 1 SB: 2 3.00, 3.00 NL: 5.42E7

T: FTMS + p EI Full ms [50.0000-750.0000]

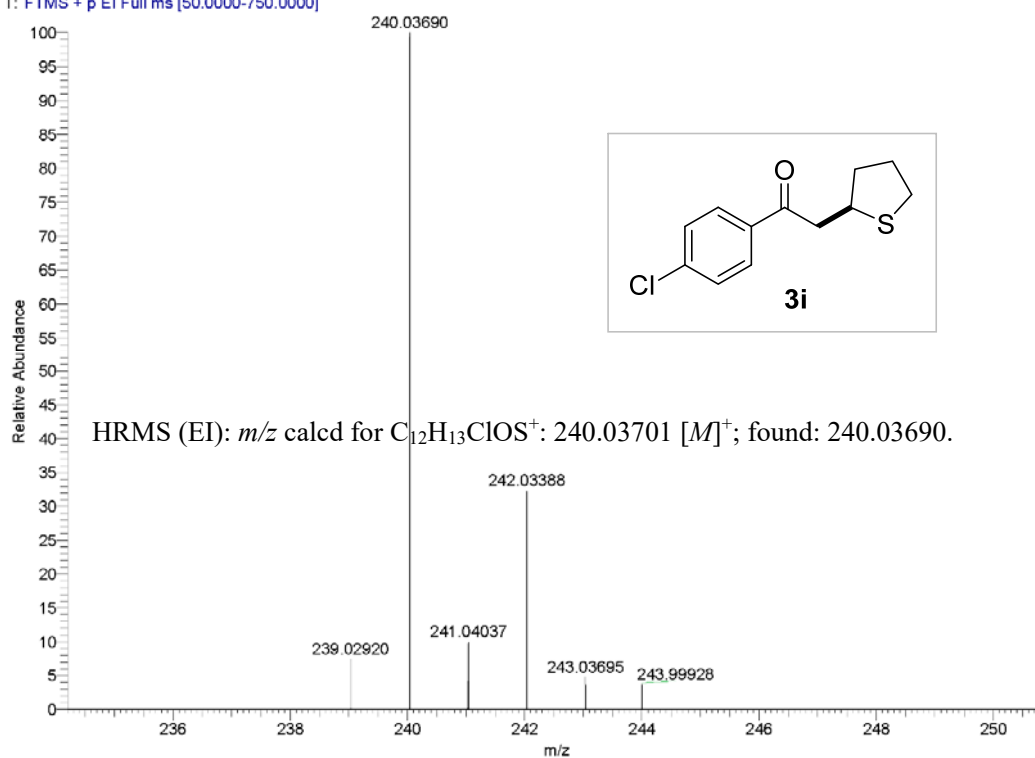HRMS spectrum of product **3i**

20210409\_001 #2237-2241 RT: 8.20-8.21 AV: 5 SB: 2 3.00, 3.00 NL: 6.12E7

T: FTMS + p EI Full ms [50.0000-750.0000]

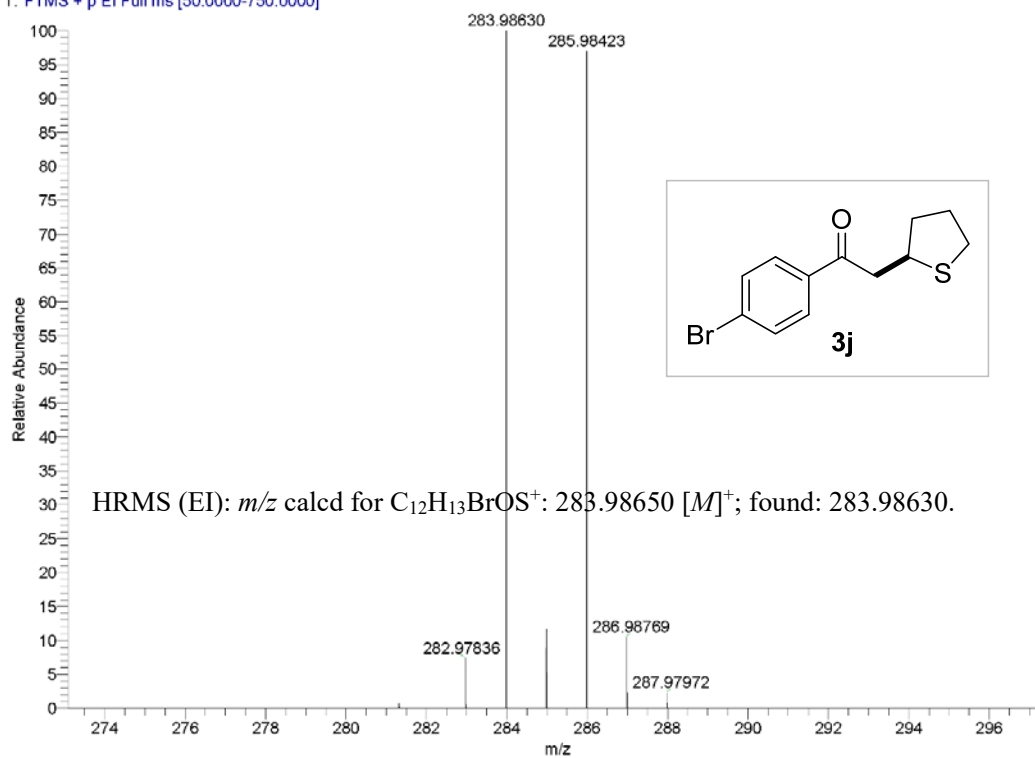HRMS spectrum of product **3j**

20210409\_002 #2166 RT: 8.14 AV: 1 SB: 2 3.00, 3.00 NL: 4.55E7  
T: FTMS + p EI Full ms [50.0000-750.0000]

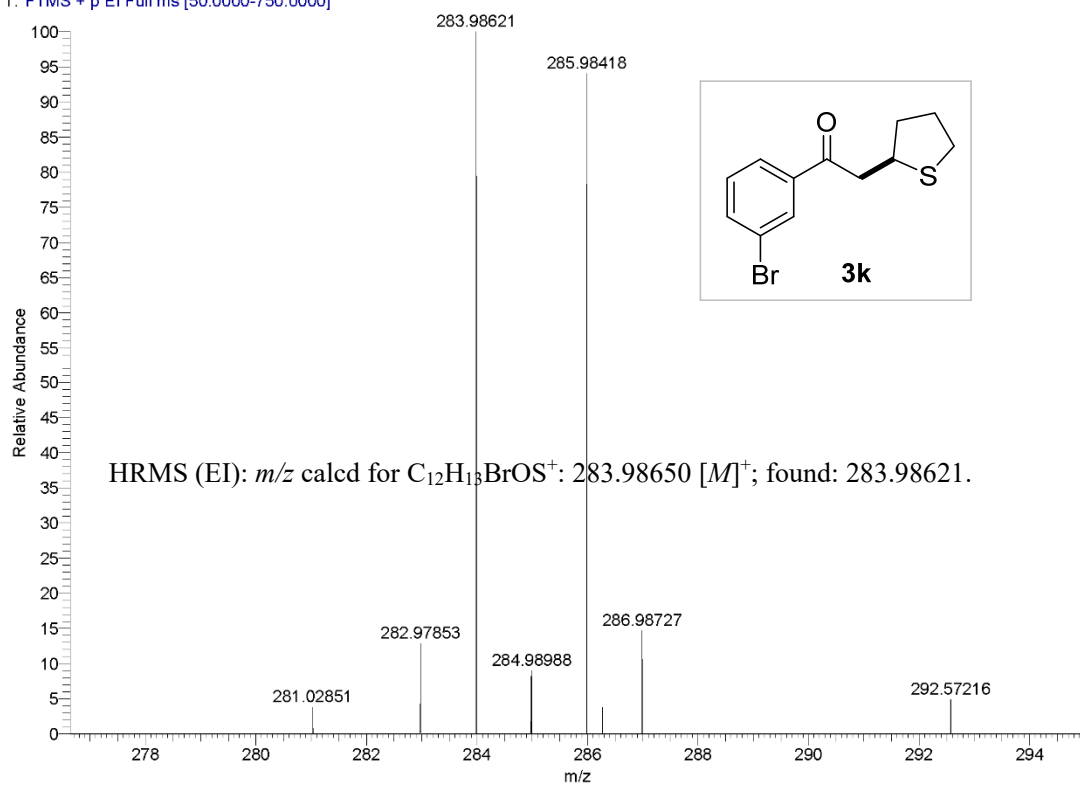

HRMS spectrum of product **3k**

20210409\_006 #2004-2028 RT: 7.83-7.88 AV: 25 SB: 2 3.00 , 3.00 NL: 5.59E4  
T: FTMS + p EI Full ms [50.0000-750.0000]

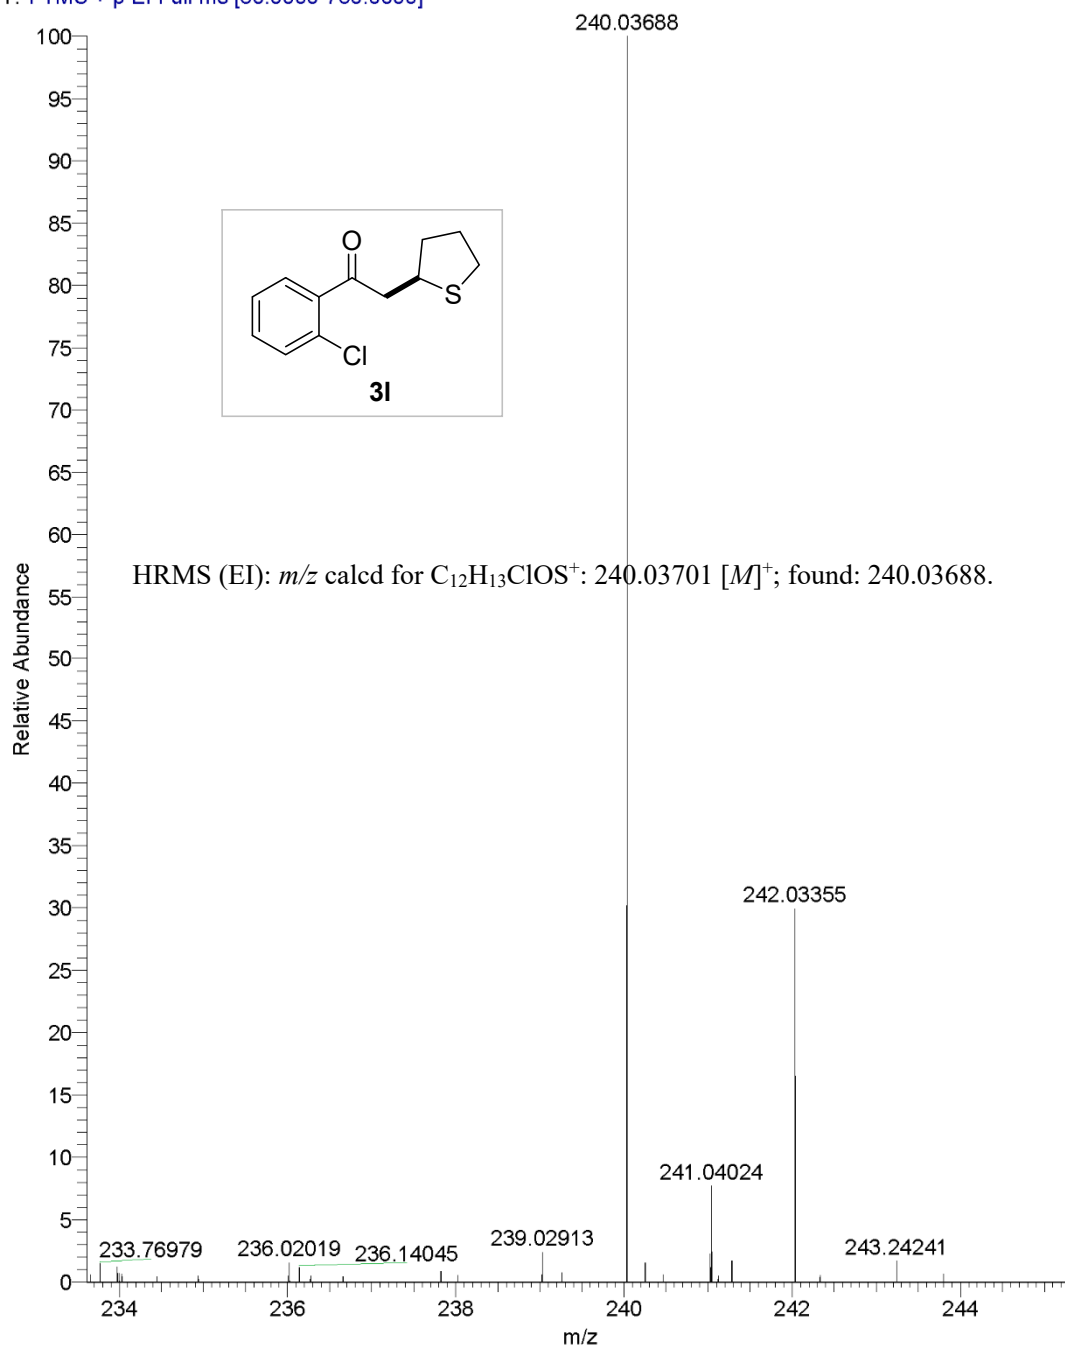

HRMS spectrum of product **3I**



20210409\_005 #2113-2119 RT: 8.02-8.03 AV: 7 SB: 21 7.99-8.00 , 8.10-8.13 NL: 6.37E4  
T: FTMS + p EI Full ms [50.0000-750.0000]

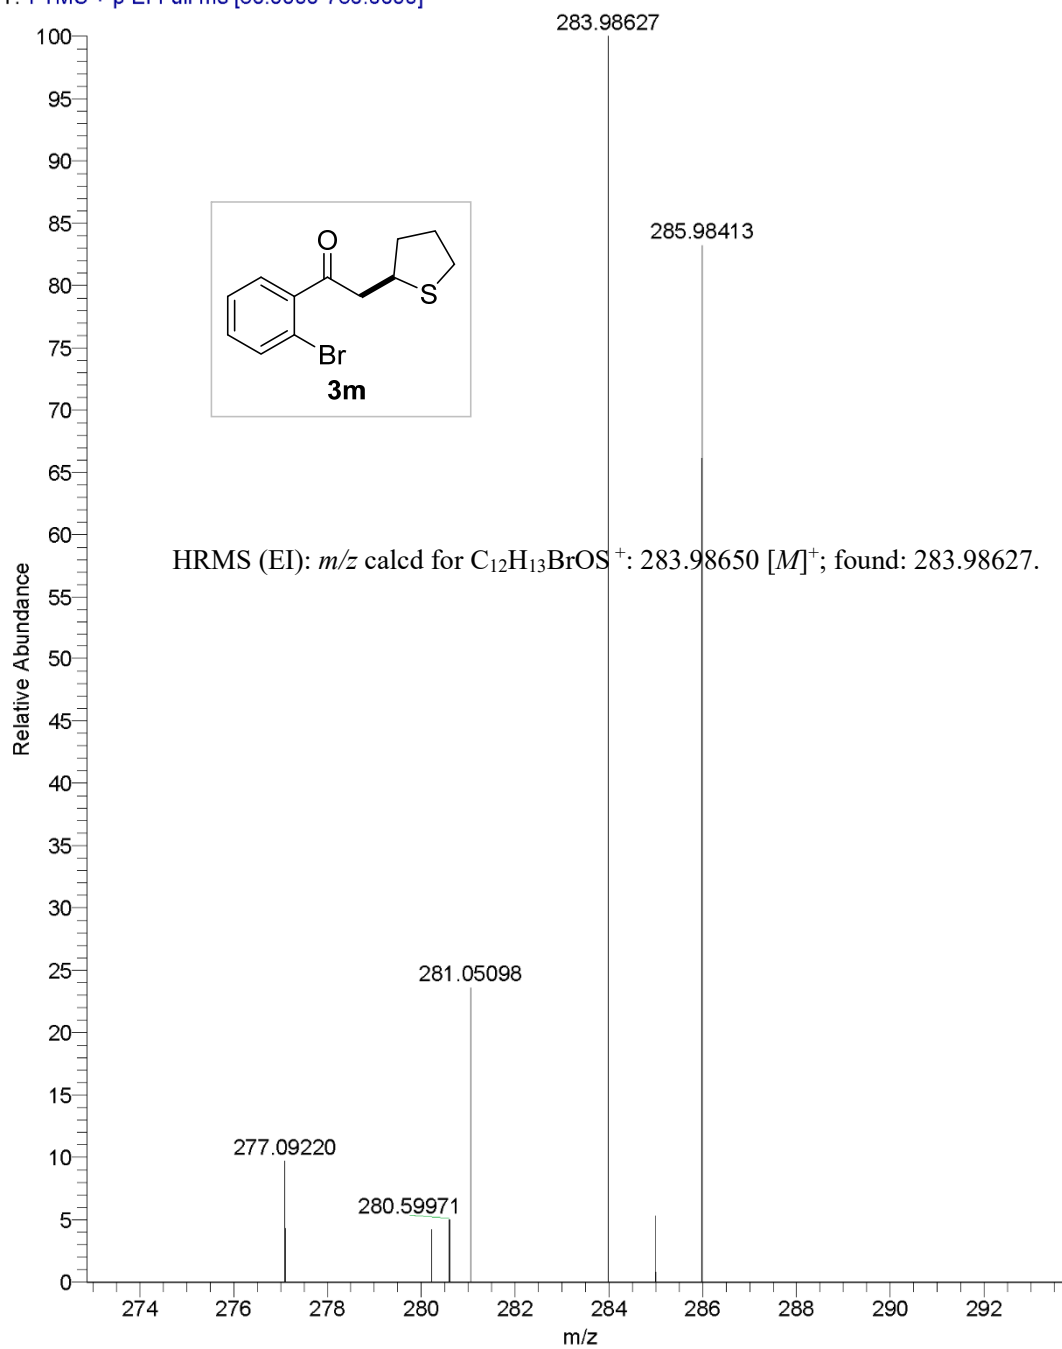

HRMS spectrum of product **3m**

Yarrhan-7 #9 RT: 0.09 AV: 1 NL: 8.03ES  
T: FTMS → p ESI Full lock: ms [50.0000-750.0000]

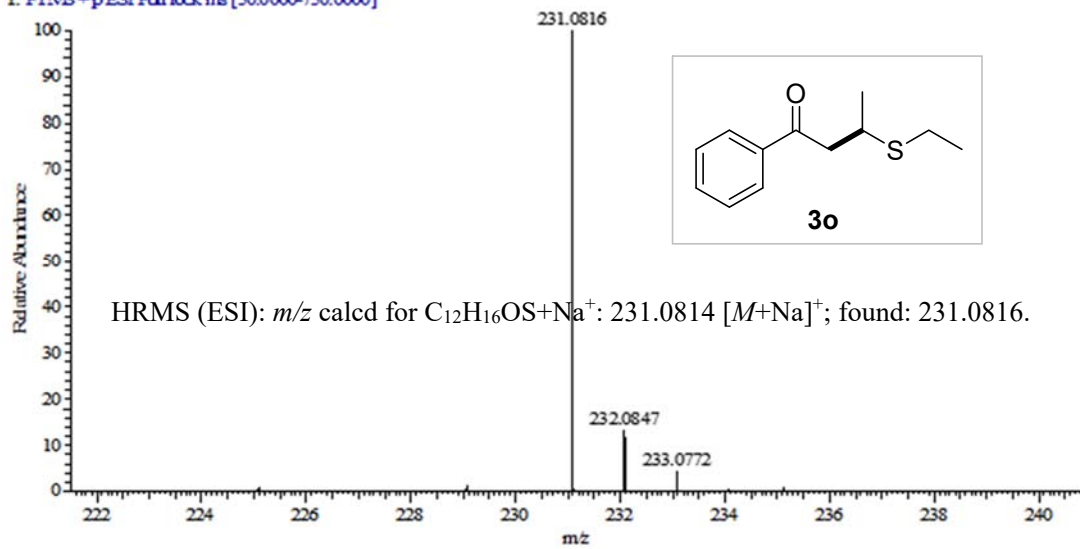

HRMS spectrum of product **3o**

D:\Test\20210518\_003

05/18/21 15:49:37

20210518\_003 #1762-1763 RT: 7.09-7.09 AV: 2 SB: 2 3.00 , 3.00 NL: 2.70E7  
T: FTMS + p EI Full ms [50.0000-750.0000]

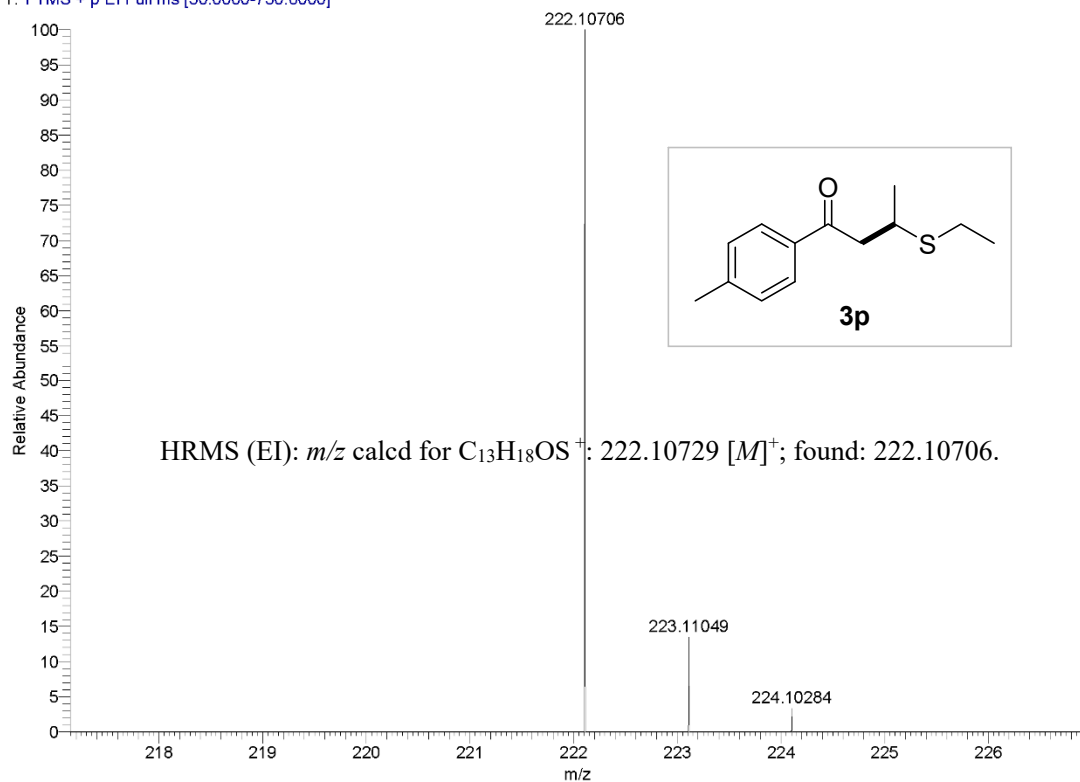

HRMS spectrum of product **3p**

20210618\_014 #1913-1918 RT: 7.60-7.61 AV: 6 SB: 2 3.00, 3.00 NL: 1.07E7  
T: FTMS + p EI Full ms [50.0000-750.0000]

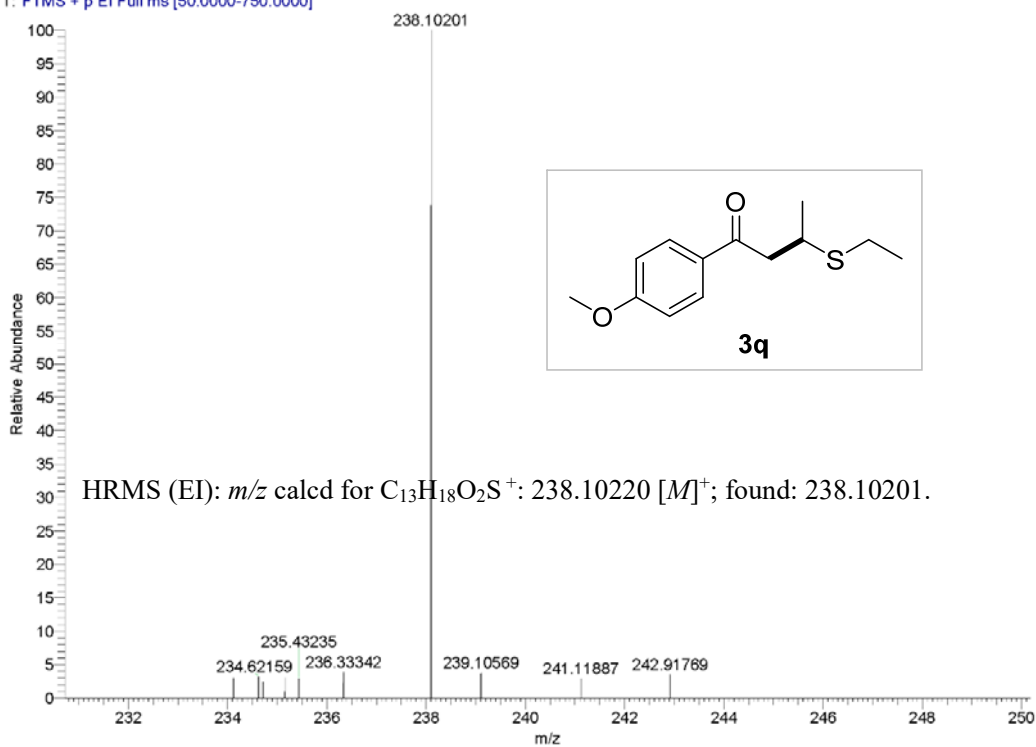HRMS spectrum of product **3q**

20210618\_011 #1980 RT: 7.77 AV: 1 SB: 2 3.00, 3.00 NL: 5.56E7  
T: FTMS + p EI Full ms [50.0000-750.0000]

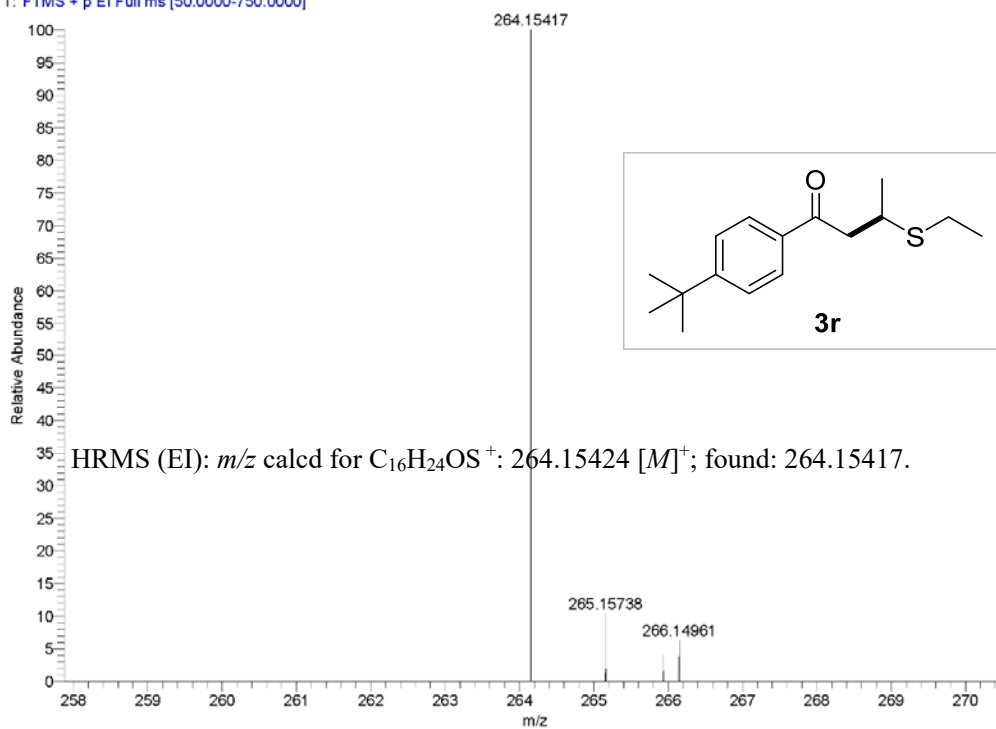HRMS spectrum of product **3r**

20210618\_013 #1762-1763 RT: 7.25-7.25 AV: 2 SB: 2 3.00, 3.00 NL: 3.38E7  
T: FTMS + p EI Full ms [50.0000-750.0000]

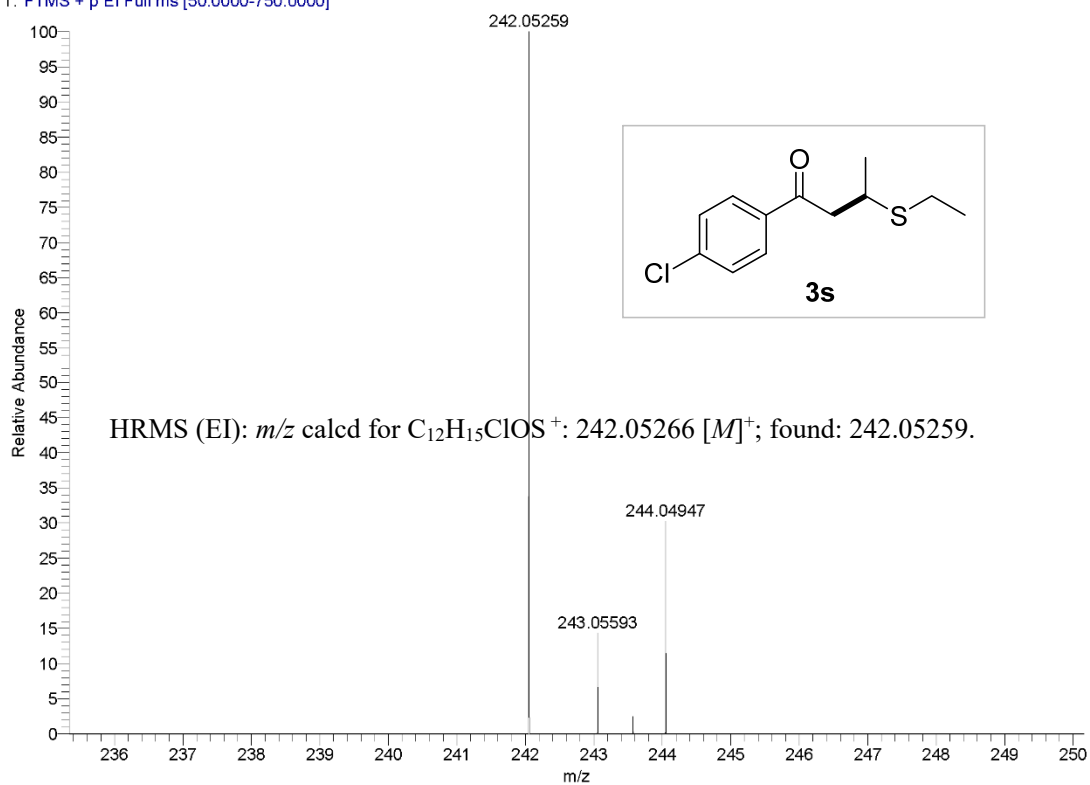

HRMS spectrum of product 3s

20210618\_012 #1908-1910 RT: 7.58-7.58 AV: 3 SB: 2 3.00, 3.00 NL: 2.21E7  
T: FTMS + p EI Full ms [50.0000-750.0000]

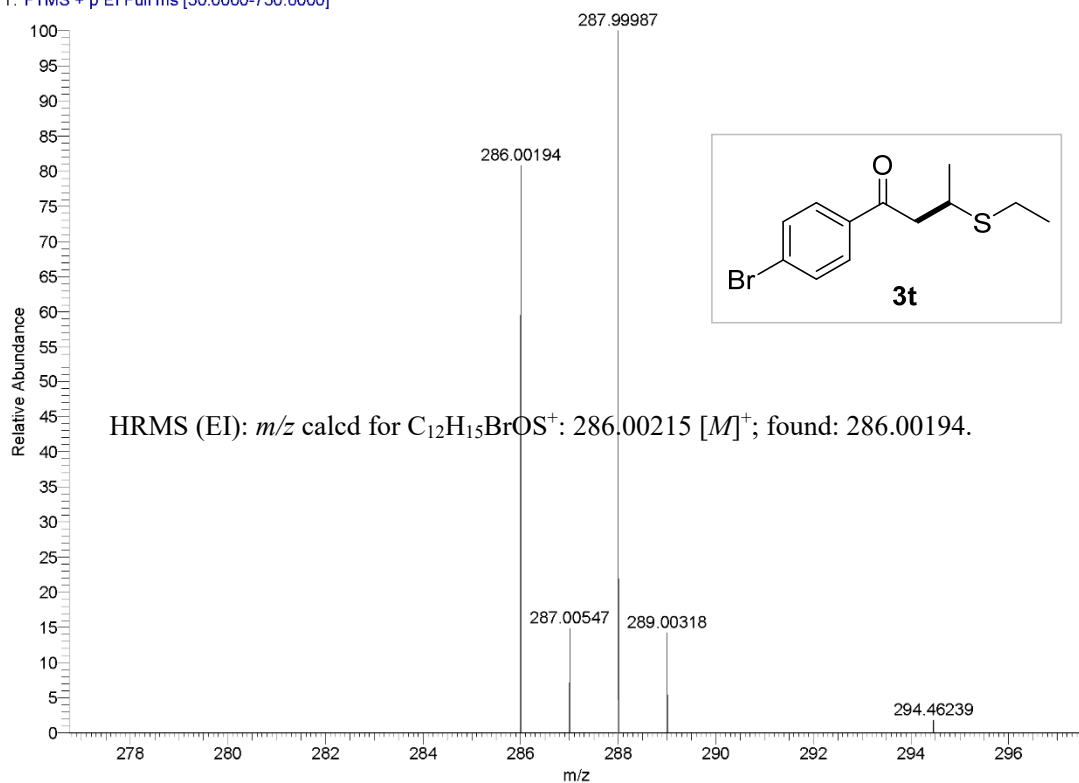

HRMS spectrum of product 3t

20210518\_001 #1812-1814 RT: 7.20-7.21 AV: 3 SB: 2 3.00, 3.00 NL: 1.68E7  
T: FTMS + p EI Full ms [50.0000-750.0000]

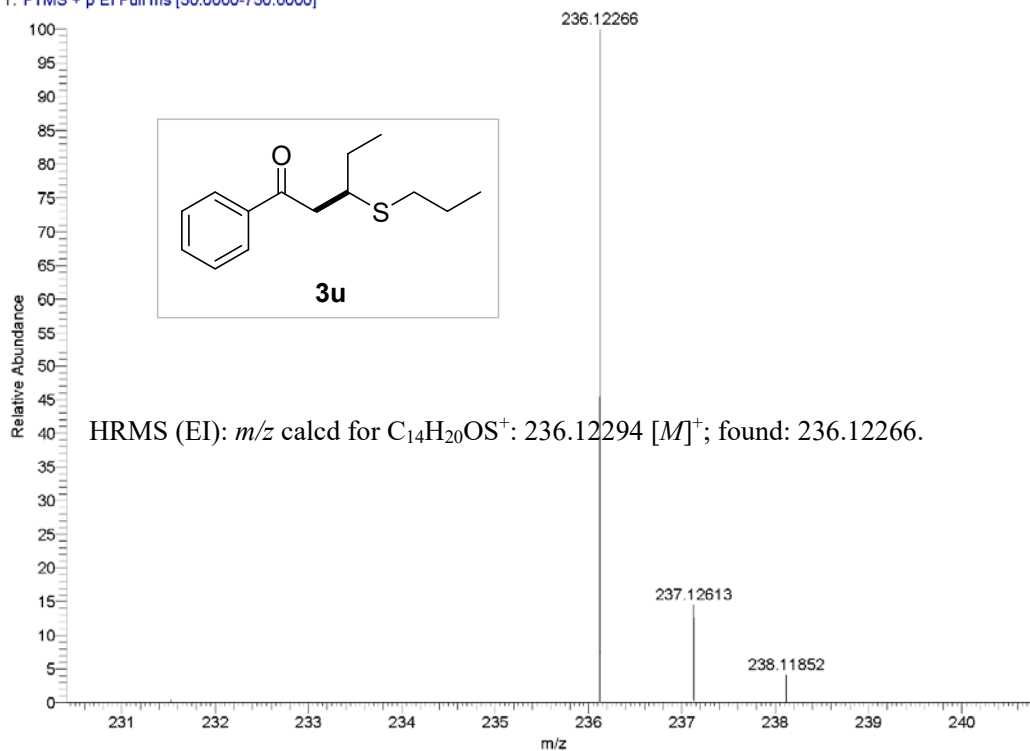

HRMS spectrum of product **3u**

20210518\_007 #1968-1971 RT: 7.57-7.57 AV: 4 SB: 2 3.00, 3.00 NL: 4.09E6  
T: FTMS + p EI Full ms [50.0000-750.0000]

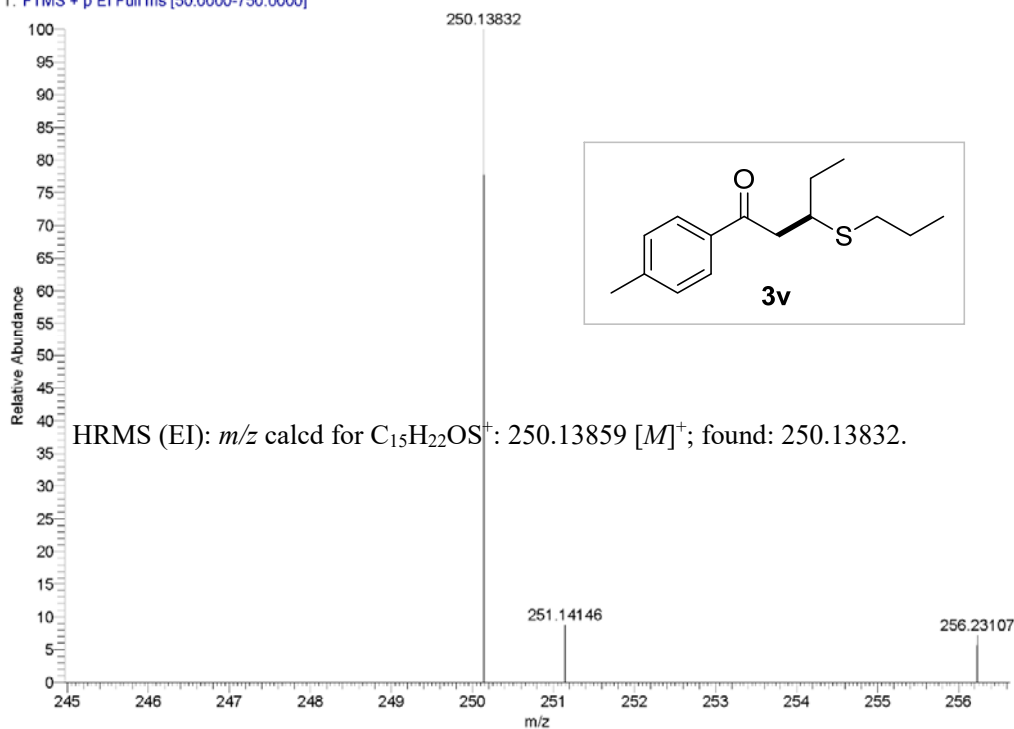

HRMS spectrum of product **3v**

20210518\_006 #2172-2176 RT: 8.04-8.05 AV: 5 SB: 2 3.00, 3.00 NL: 1.86E6  
T: FTMS + p EI Full ms [50.0000-750.0000]

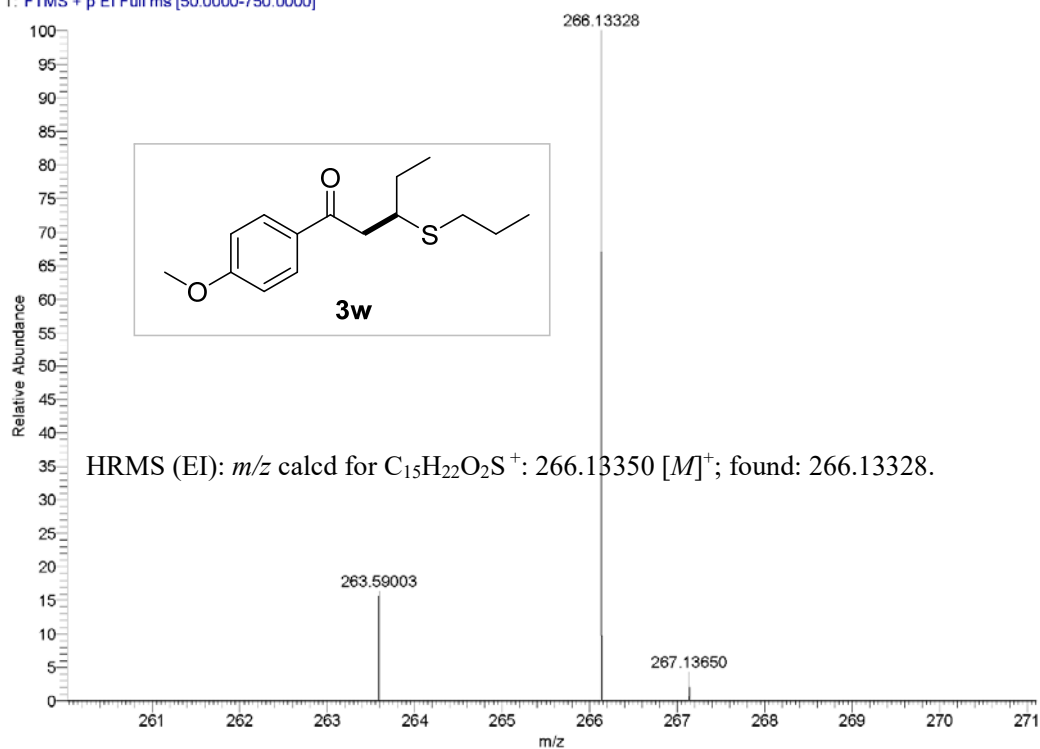

HRMS spectrum of product **3w**

20210518\_004 #2239-2242 RT: 8.19-8.19 AV: 4 SB: 2 3.00, 3.00 NL: 2.37E7  
T: FTMS + p EI Full ms [50.0000-750.0000]

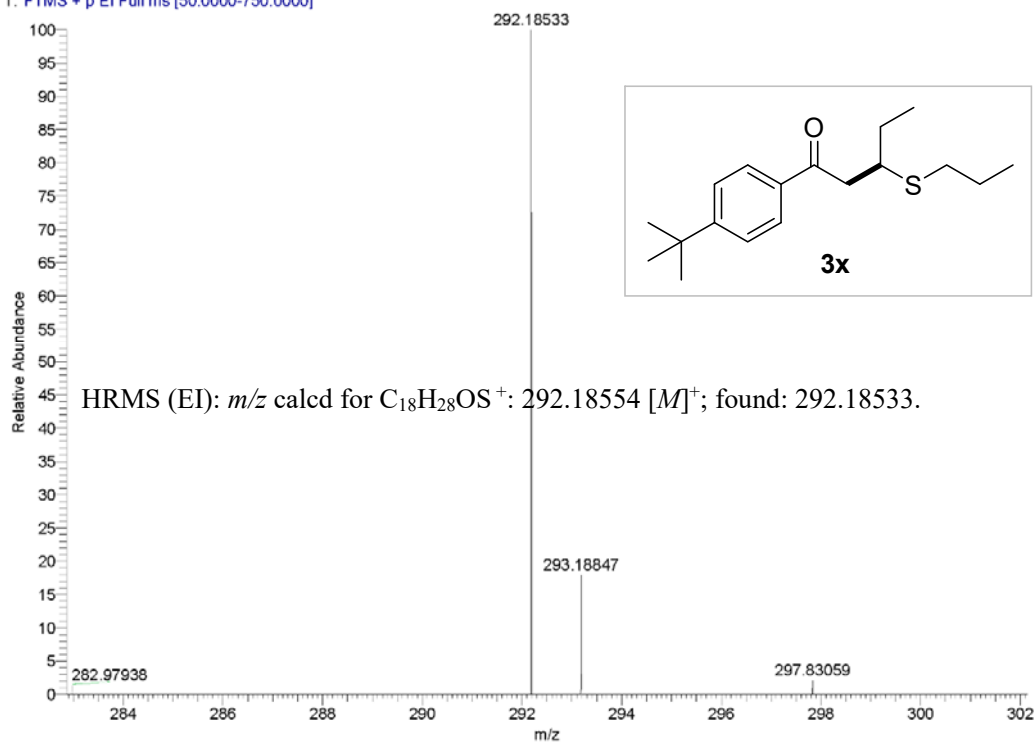

HRMS spectrum of product **3x**

yanthen-1#11 RT: 0.08 AV: 1 NL: 4.02E5  
T: FTMS+p ESI Full ms [50.0000-750.0000]

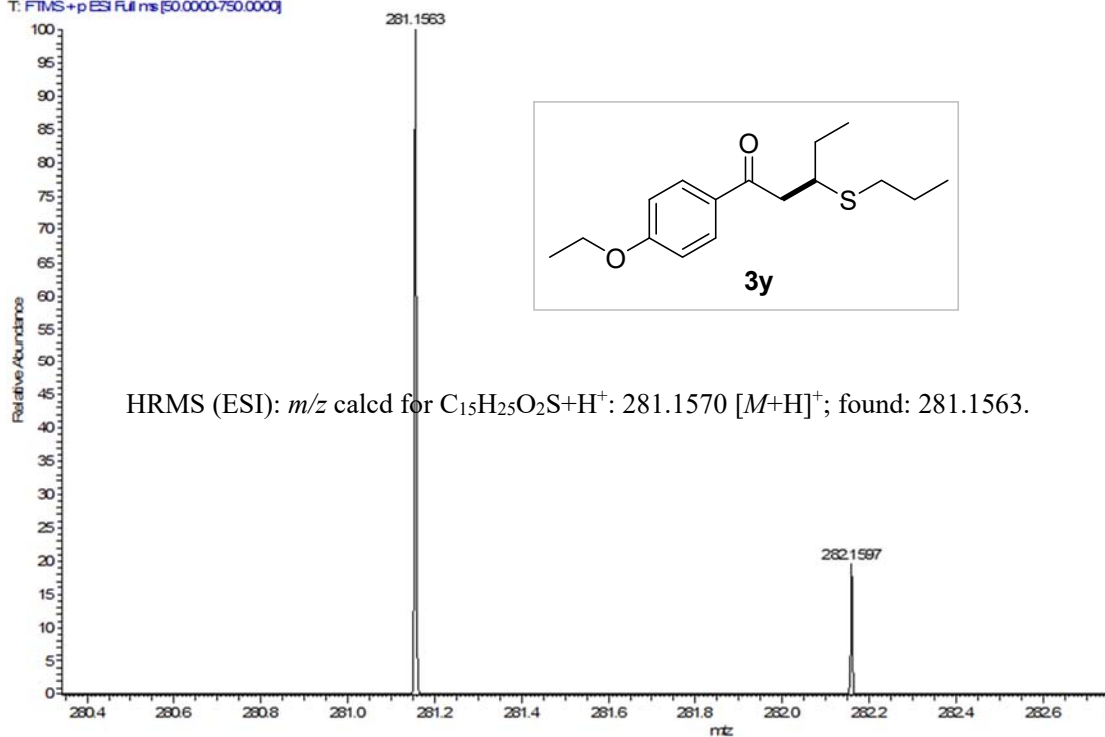

HRMS spectrum of product **3y**
